# Supplementary material for: A Computational Analysis in a Cohort of Parkinson’s Disease Patients and Clock-Modified Colorectal Cancer Cells Reveals Common Expression Alterations in Clock-Regulated Genes
Source: Cancers (Basel). 2021 Nov 28;13(23):5978. doi: 10.3390/cancers13235978 (PMC8657387; doi:10.3390/cancers13235978)
Supplement: Supplementary file 1 [file cancers-13-05978-s001.zip]

Archive with 13 entries (13 files):
- Supplementary_Files/Yalcinetal_Supplementary_Tables/Supplementary Table 3.xlsx
- Supplementary_Files/Yalcinetal_Supplementary_Tables/Supplementary Table 9.xlsx
- Supplementary_Files/Yalcinetal_Supplementary_Tables/Supplementary Table 2.xlsx
- Supplementary_Files/Yalcinetal_Supplementary_Tables/Supplementary Table 5.xlsx
- Supplementary_Files/Yalcinetal_Supplementary_Tables/Supplementary Table 10.xlsx
- Supplementary_Files/Yalcinetal_Supplementary_Tables/Supplementary Table 12.xlsx
- Supplementary_Files/Yalcinetal_Supplementary_Tables/Supplementary Table 11.xlsx
- Supplementary_Files/Yalcinetal_Supplementary_Tables/Supplementary Table 6.xlsx
- Supplementary_Files/Yalcinetal_Supplementary_Tables/Supplementary Table 1.xlsx
- Supplementary_Files/Yalcinetal_Supplementary_Tables/Supplementary Table 7.xlsx
- Supplementary_Files/Yalcinetal_Supplementary_Tables/Supplementary Table 8.xlsx
- Supplementary_Files/Yalcinetal_Supplementary_Tables/Supplementary Table 4.xlsx
- Supplementary_Files/Yalcinetal_2021_Cancers_Supplementary_File.pdf
