# Supplementary material for: A Computational Analysis in a Cohort of Parkinson’s Disease Patients and Clock-Modified Colorectal Cancer Cells Reveals Common Expression Alterations in Clock-Regulated Genes
Source: Cancers (Basel). 2021 Nov 28;13(23):5978. doi: 10.3390/cancers13235978 (PMC8657387; doi:10.3390/cancers13235978)
Supplement: Supplementary file 1 [file cancers-13-05978-s001.zip › Supplementary_Files/Yalcinetal_Supplementary_Tables/Supplementary Table 1.xlsx]

## Sheet: Sheet1
Supplementary Table 1. Demographic information of GSE99039 dataset downloaded from GEO (the date of data retrieval 16.02.2021) and ArrayQualityMetrics outlier test results
Sample (GEO Accession Number)	Distance_between_arrays	Boxplots	MA_Plots	Disease_Status	Sex	Age at 1st symptom	Age at exam	Mutated_PD	Batch	Hoehn&Yahr(off)	Hoehn&Yahr(on)	Moca Score	updrs.i	updrs.ii	updrs.iii.score.off	updrs.iii.score.on	updrs.iv
GSM2630758	x			CONTROL	Female	NA	NA	NONE	01/15/08_L	0	8	29	0	0	0	0	0
GSM2630759				IPD	Male	55	NA	NONE	01/15/08_L	0	9	0	3	6	0	18	1
GSM2630760				IPD	Female	66	NA	NONE	01/15/08_L	0	9	0	0	0	0	18	0
GSM2630761				CONTROL	Female	NA	NA	NONE	01/15/08_L	0	8	27	0	0	0	1	0
GSM2630762				IPD	Female	NA	NA	NONE	01/16/08_L	0	0	0	0	0	0	0	0
GSM2630763				IPD	Female	64	NA	NONE	01/16/08_L	0	9	0	0	2	0	15	0
GSM2630764				IPD	Male	NA	NA	NONE	01/16/08_L	0	0	0	0	0	0	0	0
GSM2630765				IPD	Male	NA	NA	NONE	01/16/08_L	0	9	30	0	4	0	0	0
GSM2630766				IPD	Male	65	NA	NONE	01/16/08_L	0	2	0	3	4	0	28	0
GSM2630768				IPD	Female	33	NA	NONE	02/22/08_L	0	2.5	29	0	15	0	39	0
GSM2630769				CONTROL	Female	43	NA	NONE	02/22/08_L	0	8	0	0	0	0	0	0
GSM2630770				IPD	Male	37	NA	NONE	02/22/08_L	0	3	26	0	16	0	51	12
GSM2630771				CONTROL	Female	NA	NA	NONE	02/22/08_L	0	0	0	0	0	0	0	0
GSM2630772				CONTROL	Male	NA	NA	NONE	02/22/08_L	0	8	30	0	0	0	2	1
GSM2630773				IPD	Male	55	NA	NONE	02/26/08_L	0	3	0	2	18	0	32	2
GSM2630774				CONTROL	Female	NA	NA	NONE	01/18/08_L	0	8	28	0	0	0	0	0
GSM2630777				CONTROL	Female	NA	NA	NONE	02/26/08_L	0	0	0	0	1	0	0	0
GSM2630778				CONTROL	Male	NA	NA	NONE	02/26/08_L	0	8	29	2	1	0	4	0
GSM2630779				CONTROL	Female	NA	NA	NONE	02/26/08_L	0	8	30	1	1	0	3	0
GSM2630780				CONTROL	Female	NA	NA	NONE	01/16/08_L	0	8	30	0	0	0	0	0
GSM2630781				IPD	Male	NA	NA	NONE	01/17/08_L	0	0	0	0	0	0	0	0
GSM2630783				CONTROL	Female	NA	NA	NONE	01/25/08_L	0	0	0	0	0	0	0	0
GSM2630784				CONTROL	Male	NA	NA	NONE	01/25/08_L	0	8	30	0	0	0	0	0
GSM2630785				CONTROL	Male	NA	NA	NONE	01/25/08_L	0	8	30	0	0	0	2	0
GSM2630787				CONTROL	Female	NA	NA		02/04/08_L	0	8	0	0	1	0	2	0
GSM2630788				CONTROL	Female	NA	NA		02/04/08_L	0	8	0	0	0	0	0	0
GSM2630789				CONTROL	Male	NA	NA		02/07/08_L	0	8	29	0	0	0	1	0
GSM2630790				CONTROL	Female	NA	NA		02/07/08_L	0	8	0	1	0	0	3	0
GSM2630791				IPD	Male	NA	NA	NONE	02/08/08_L	0	0	0	0	0	0	0	0
GSM2630793				IPD	Male	64	NA	NONE	02/08/08_L	0	3	30	1	14	0	33	0
GSM2630794				IPD	Male	NA	NA	NONE	03/08/08_L	0	0	0	0	0	0	0	0
GSM2630795				IPD	Female	55	NA	NONE	02/08/08_L	0	3	0	0	0	0	28	0
GSM2630799				CONTROL	Female	NA	NA	NONE	02/12/08_L	0	8	29	1	1	0	2	0
GSM2630800				CONTROL	Female	NA	NA	NONE	02/12/08_L	0	8	29	0	0	0	0	0
GSM2630801				CONTROL	Female	37	NA	NONE	02/12/08_L	0	3	30	1	14	0	20	0
GSM2630802				IPD	Female	36	NA	NONE	02/12/08_L	0	2.5	30	2	21	0	21	10
GSM2630803				IPD	Female	NA	NA	NONE	02/12/08_L	0	8	30	0	0	0	3	0
GSM2630804				IPD	Female	68	NA	NONE	02/12/08_L	0	1	29	2	7	0	19	2
GSM2630805				IPD	Male	52	NA	NONE	02/12/08_L	0	9	0	6	33	0	49	1
GSM2630806				IPD	Male	42	NA	NONE	02/12/08_L	0	2.5	28	0	6	0	22	2
GSM2630807				IPD	Female	43	NA	NONE	02/12/08_L	0	2.5	30	4	10	0	15	1
GSM2630810				CONTROL	Female	NA	NA	NONE	02/22/08_L	0	8	0	0	0	0	0	1
GSM2630812				CONTROL	Male	NA	NA	NONE	02/22/08_L	0	0	30	0	0	0	0	0
GSM2630813				IPD	Male	76	NA	NONE	05/16/08_L	0	2.5	0	1	8	0	23	1
GSM2630815				IPD	Male	64	NA	NONE	05/16/08_L	0	2	0	1	9	0	29	1
GSM2630816				CONTROL	Female	NA	NA	NONE	06/19/08_L	0	8	30	0	0	0	0	0
GSM2630817				IPD	Female	NA	NA	NONE	05/16/08_L	0	0	0	0	0	0	0	0
GSM2630818				CONTROL	Female	NA	NA	NONE	05/16/08_L	0	0	0	0	0	0	0	0
GSM2630821				IPD	Female	46	NA	NONE	05/16/08_L	0	9	30	1	0	0	9	0
GSM2630822				IPD	Male	56	NA	NONE	05/16/08_L	0	1.5	0	1	7	0	15	0
GSM2630823				IPD	Female	44	NA	NONE	05/16/08_L	0	3	29	7	17	0	24	7
GSM2630824				IPD	Female	60	NA	NONE	05/27/08_L	0	3	28	0	19	0	0	0
GSM2630825				IPD	Female	46	NA	NONE	05/27/08_L	0	2	30	0	12	0	12	2
GSM2630826				IPD	Female	NA	NA	NONE	05/29/08_L	0	0	0	0	0	0	0	0
GSM2630827				IPD	Female	76	NA	NONE	05/27/08_L	0	3	0	0	11	0	27	0
GSM2630828				IPD	Male	55	NA	NONE	05/27/08_L	0	2.5	30	1	5	0	17	6
GSM2630829				IPD	Male	67	NA	NONE	05/27/08_L	0	3	0	6	17	0	0	0
GSM2630830				CONTROL	Female	NA	NA	NONE	05/27/08_L	0	0	0	0	0	0	0	0
GSM2630835				IPD	Female	45	NA	NONE	05/27/08_L	0	2.5	29	3	5	0	22	3
GSM2630837				IPD	Female	51	NA	NONE	05/29/09_L	0	3	29	2	9	0	26	3
GSM2630838				IPD	Female	NA	NA	NONE	05/29/09_L	0	0	0	0	0	0	0	0
GSM2630839				IPD	Male	65	NA	NONE	05/29/08_L	0	3	0	0	0	0	0	0
GSM2630840				CONTROL	Female	NA	NA	NONE	05/29/08_L	0	8	29	0	0	0	2	0
GSM2630841				IPD	Male	78	NA	NONE	05/29/08_L	0	2	28	3	6	0	18	0
GSM2630842				IPD	Female	55	NA	NONE	05/29/08_L	0	2	0	0	3	0	0	0
GSM2630843				CONTROL	Male	NA	NA	NONE	05/29/08_L	0	8	30	0	0	0	0	0
GSM2630853				CONTROL	Male	41	NA	NONE	09/16/09_L	0	8	30	0	0	0	1	0
GSM2630854				IPD	Female	37	NA	NONE	08/28/09_L	0	1	29	2	1	0	7	0
GSM2630855				CONTROL	Male	NA	NA	NONE	08/28/09_L	0	0	29	1	0	0	4	0
GSM2630856				IPD	Male	75	NA	NONE	08/28/09_L	0	9	0	0	0	0	0	0
GSM2630857				CONTROL	Female	NA	NA	NONE	08/28/09_L	0	0	0	0	0	0	0	0
GSM2630861				CONTROL	Female	NA	NA	NONE	08/28/09_L	0	8	30	0	1	0	0	0
GSM2630862	x	x		IPD	Male	NA	NA	NONE	09/16/09_L	0	0	0	0	0	0	0	0
GSM2630863				CONTROL	Male	NA	NA	NONE	08/28/09_L	0	8	29	0	0	0	0	0
GSM2630864				CONTROL	Female	NA	NA	NONE	08/28/09_L	0	8	29	0	0	0	0	0
GSM2630865				CONTROL	Male	NA	NA	NONE	08/28/09_L	0	8	29	0	0	0	0	0
GSM2630866				CONTROL	Male	NA	NA	NONE	08/28/09_L	0	8	29	0	0	0	0	0
GSM2630867				IPD	Male	62	NA	NONE	08/28/09_L	0	9	30	0	0	0	31	0
GSM2630868				CONTROL	Female	NA	NA	NONE	08/28/09_L	0	0	0	0	0	0	0	0
GSM2630869				CONTROL	Male	NA	NA	NONE	08/28/09_L	0	8	29	0	1	0	0	0
GSM2630870				IPD	Male	NA	NA	NONE	08/28/09_L	0	0	0	0	0	0	0	0
GSM2630871				CONTROL	Female	NA	NA	NONE	08/28/09_L	0	8	30	0	0	0	0	0
GSM2630872				CONTROL	Female	NA	NA	NONE	08/28/09_L	0	8	29	0	0	0	1	0
GSM2630873				CONTROL	Female	NA	NA	NONE	08/28/09_L	0	8	30	0	0	0	0	0
GSM2630874				CONTROL	Female	NA	NA	NONE	08/28/09_L	0	8	30	0	0	0	0	0
GSM2630876				CONTROL	Female	NA	NA	NONE	08/28/09_L	0	8	29	0	0	0	0	1
GSM2630877				CONTROL	Female	NA	NA	NONE	08/28/09_L	0	8	29	0	0	0	1	0
GSM2630878				CONTROL	Male	NA	NA	NONE	08/28/09_L	0	8	29	0	0	0	6	0
GSM2630879				CONTROL	Male	NA	NA	NONE	08/28/09_L	0	8	30	0	0	0	1	0
GSM2630880				CONTROL	Female	NA	NA	NONE	08/28/09_L	0	8	29	1	1	0	1	0
GSM2630881				CONTROL	Female	NA	NA	NONE	08/28/09_L	0	8	30	0	0	0	0	0
GSM2630882				CONTROL	Female	NA	NA	NONE	08/28/09_L	0	8	30	1	0	0	0	0
GSM2630883				CONTROL	Male	NA	NA	NONE	08/28/09_L	0	8	30	1	0	0	0	0
GSM2630884				CONTROL	Male	NA	NA	NONE	08/28/09_L	0	8	30	0	0	0	0	0
GSM2630885				CONTROL	Male	NA	NA	NONE	08/28/09_L	0	8	30	1	0	0	0	0
GSM2630886				IPD	Female	NA	NA	NONE	08/28/09_L	0	8	30	0	0	0	0	2
GSM2630888				CONTROL	Male	NA	NA	NONE	08/31/09_L	0	8	28	0	0	0	1	0
GSM2630890				IPD	Male	NA	NA	NONE	08/28/09_L	0	0	0	0	0	0	0	0
GSM2630891				IPD	Male	72	NA	NONE	08/28/09_L	0	3	30	4	16	0	29	3
GSM2630892				IPD	Male	55	NA	NONE	08/28/09_L	0	1.5	28	5	11	0	6	2
GSM2630893				IPD	Male	68	NA	NONE	08/28/09_L	0	2	28	4	6	0	15	0
GSM2630895				IPD	Female	NA	NA	NONE	08/28/09_L	0	0	0	0	0	0	0	0
GSM2630896	x			CONTROL	Female	NA	NA	NONE	08/28/09_L	0	8	30	0	0	0	0	0
GSM2630897	x			CONTROL	Female	NA	NA	NONE	08/31/09_L	0	8	29	1	0	0	0	0
GSM2630898				IPD	Male	NA	NA	NONE	09/16/09_L	0	0	0	0	0	0	0	0
GSM2630899				CONTROL	Male	NA	NA	NONE	08/28/09_L	0	0	0	0	0	0	0	0
GSM2630900				IPD	Female	NA	NA	NONE	08/28/09_L	0	0	0	0	0	0	0	0
GSM2630901				IPD	Male	NA	NA	NONE	08/28/09_L	0	0	0	0	0	0	0	0
GSM2630902				IPD	Male	NA	NA	NONE	08/28/09_L	0	0	0	0	0	0	0	0
GSM2630903				IPD	Male	NA	NA	NONE	08/28/09_L	0	0	0	0	0	0	0	0
GSM2630904				IPD	Male	NA	NA	NONE	08/28/09_L	0	0	0	0	0	0	0	0
GSM2630905				CONTROL	Male	NA	NA	NONE	08/28/09_L	0	0	0	0	0	0	0	0
GSM2630906				CONTROL	Male	NA	NA	NONE	08/28/09_L	0	0	0	0	0	0	0	0
GSM2630907				CONTROL	Female	NA	NA	NONE	08/28/09_L	0	0	0	0	0	0	0	0
GSM2630908				CONTROL	Female	NA	NA	PINK1	08/28/09_L	0	8	0	0	0	0	0	0
GSM2630909				CONTROL	Female	NA	NA	NONE	08/28/09_L	0	0	0	0	0	0	0	0
GSM2630910				CONTROL	Male	NA	NA	NONE	08/28/09_L	0	8	28	0	0	0	1	0
GSM2630911				IPD	Female	74	NA	NONE	08/28/09_L	0	3	22	3	10	0	32	0
GSM2630912				CONTROL	Male	NA	NA	NONE	08/28/09_L	0	8	30	2	0	0	0	0
GSM2630913				CONTROL	Female	NA	NA	NONE	08/28/09_L	0	8	30	0	0	0	0	0
GSM2630914				IPD	Male	39	NA	NONE	08/28/09_L	0	1	28	0	1	0	12	0
GSM2630915				IPD	Female	NA	NA	NONE	08/28/09_L	0	0	0	0	0	0	0	0
GSM2630916				CONTROL	Female	NA	NA	NONE	09/01/09_L	0	0	0	0	0	0	0	0
GSM2630917				CONTROL	Male	NA	NA	NONE	09/01/09_L	0	0	0	0	0	0	0	0
GSM2630918				IPD		NA	NA		09/01/09_L	0	0	0	0	0	0	0	0
GSM2630921				IPD	Male	42	NA	NONE	09/01/09_L	0	3	30	3	18	0	40	0
GSM2630922				CONTROL	Male	NA	NA	NONE	09/01/09_L	0	0	0	0	0	0	0	0
GSM2630923				CONTROL	Female	NA	NA	NONE	09/01/09_L	0	0	0	0	0	0	0	0
GSM2630924				CONTROL	Male	NA	NA	NONE	09/01/09_L	0	0	0	0	0	0	0	0
GSM2630925				CONTROL	Female	NA	NA	NONE	09/01/09_L	0	0	0	0	0	0	0	0
GSM2630927				CONTROL	Female	NA	NA		09/01/09_L	0	0	0	0	0	0	0	0
GSM2630928				CONTROL	Female	NA	NA		09/01/09_L	0	0	0	0	0	0	0	0
GSM2630929				CONTROL	Female	NA	NA	NONE	09/01/09_L	0	0	0	0	0	0	0	0
GSM2630930				CONTROL	Female	NA	NA	NONE	09/01/09_L	0	0	0	0	0	0	0	0
GSM2630931				IPD	Male	NA	NA	NONE	09/01/09_L	0	0	0	0	0	0	0	0
GSM2630932				CONTROL	Female	NA	NA	NONE	09/01/09_L	0	0	0	0	0	0	0	0
GSM2630938				IPD	Male	67	72	NONE	09/01/09_TRO	NA	2	24	0	14	NA	23	2
GSM2630939				IPD	Female	59	65	NONE	09/02/09_TRO	NA	1	30	5	3	NA	9	4
GSM2630940				IPD	Female	51	58	NONE	09/01/09_TRO	NA	1	30	2	2	NA	8	3
GSM2630941				IPD	Male	57	61	NONE	09/01/09_TRO	NA	2	27	1	7	NA	30	0
GSM2630942				IPD	Female	62	64	NONE	09/01/09_TRO	NA	2.5	28	5	18	NA	20	6
GSM2630944				IPD	Female	53	61	NONE	09/01/09_TRO	NA	2.5	29	2	13	NA	26	10
GSM2630945				IPD	Female	41	45	NONE	09/16/09_TRO	NA	1	28	4	4	NA	17	1
GSM2630947				IPD	Male	55	56	NONE	09/01/09_TRO	NA	1	27	0	3	NA	12	0
GSM2630948				IPD	Female	58	67	NONE	09/01/09_TRO	NA	2	30	0	19	NA	22	4
GSM2630949				IPD	Female	44	54	NONE	09/02/09_TRO	NA	3	30	3	17	NA	42	11
GSM2630950				IPD	Male	70	75	NONE	09/01/09_TRO	3	NA	20	6	17	46	NA	2
GSM2630951				IPD	Male	58	63	NONE	09/01/09_TRO	NA	2	25	1	4	NA	16	1
GSM2630956				IPD	Male	58	71	NONE	09/01/09_TRO	4	NA	17	4	22	49	NA	7
GSM2630957				IPD	Female	58	67	NONE	09/01/09_TRO	NA	4	25	7	24	NA	58	9
GSM2630958				CONTROL	Female	NA	40	NONE	09/01/09_TRO	0	NA	30	NA	NA	0	NA	NA
GSM2630959				IPD	Female	58	71	NONE	09/01/09_TRO	NA	1	28	2	6	NA	7	3
GSM2630960				IPD	Female	62	70	NONE	09/01/09_TRO	NA	2	27	6	8	NA	14	4
GSM2630961				CONTROL	Male	NA	59	NONE	09/02/09_TRO	0	NA	26	NA	NA	0	NA	NA
GSM2630964				IPD	Male	41	44	NONE	09/01/09_TRO	1	NA	26	0	11	19	NA	0
GSM2630965				CONTROL	Female	NA	39	NONE	09/01/09_TRO	0	NA	30	NA	NA	0	NA	NA
GSM2630966				IPD	Female	67	71	NONE	09/01/09_TRO	NA	2	26	1	5	NA	12	0
GSM2630967				IPD	Female	60	80	NONE	09/01/09_TRO	NA	3	22	2	8	NA	42	4
GSM2630968				IPD	Male	68	70	NONE	09/01/09_TRO	NA	2	25	0	3	NA	31	1
GSM2630969				IPD	Male	56	64	NONE	08/20/09_TRO	NA	3	30	1	2	NA	16	4
GSM2630970				IPD	Male	60	71	NONE	08/20/09_TRO	NA	3	13	6	19	NA	46	7
GSM2630971				CONTROL	Female	NA	61	NONE	08/20/09_TRO	0	NA	28	NA	NA	0	NA	NA
GSM2630972				IPD	Male	43	48	NONE	08/20/09_TRO	NA	1	28	0	5	NA	13	0
GSM2630973		x		IPD	Male	55	58	NONE	08/20/09_TRO	NA	1	29	1	3	NA	8	1
GSM2630974				CONTROL	Male	NA	75	NONE	08/20/09_TRO	0	NA	30	NA	NA	2	NA	NA
GSM2630975				IPD	Female	46	47	NONE	08/20/09_TRO	NA	2.5	26	9	20	NA	34	10
GSM2630976				IPD	Female	73	75	NONE	08/25/09_TRO	NA	2.5	24	2	4	NA	24	0
GSM2630977				IPD	Female	66	71	NONE	08/25/09_TRO	NA	3	30	3	11	NA	17	2
GSM2630978				IPD	Male	47	49	NONE	09/02/09_TRO	NA	1	27	2	1	NA	5	2
GSM2630979				IPD	Female	61	65	NONE	08/25/09_TRO	NA	1	30	1	6	NA	7	2
GSM2630980				CONTROL	Female	NA	58	NONE	08/25/09_TRO	0	NA	25	NA	NA	1	NA	NA
GSM2630981				IPD	Female	60	62	NONE	08/25/09_TRO	ND	ND	25	0	3	NA	16	0
GSM2630982				IPD	Male	57	62	NONE	09/16/09_TRO	2	NA	29	2	8	13	NA	1
GSM2630983				IPD	Female	38	51	NONE	08/25/09_TRO	NA	2	ND	0	20	NA	11	11
GSM2630984				CONTROL	Female	NA	59	NONE	08/25/09_TRO	0	NA	29	NA	NA	0	NA	NA
GSM2630985				IPD	Female	50	58	NONE	08/25/09_TRO	NA	1	29	7	7	NA	6	1
GSM2630986				IPD	Male	53	59	NONE	08/25/09_TRO	NA	2	27	3	4	NA	24	0
GSM2630988				IPD	Male	43	57	NONE	08/25/09_TRO	NA	2	ND	4	9	NA	27	0
GSM2630989				IPD	Male	33	42	NONE	08/25/09_TRO	ND	ND	29	8	16	NA	22	5
GSM2630990				CONTROL	Female	NA	65	NONE	08/25/09_TRO	0	NA	26	NA	NA	0	NA	NA
GSM2630991				IPD	Female	65	74	NONE	08/25/09_TRO	NA	3	23	4	20	NA	22	11
GSM2630992				IPD	Female	43	58	NONE	08/25/09_TRO	NA	2.5	ND	4	6	NA	7	6
GSM2630993				CONTROL	Male	NA	53	NONE	08/25/09_TRO	0	NA	29	NA	NA	0	NA	NA
GSM2630994				IPD	Female	46	49	NONE	08/25/09_TRO	ND	ND	26	0	6	NA	19	0
GSM2630995				IPD	Male	68	69	NONE	08/25/09_TRO	2	NA	29	1	3	19	NA	0
GSM2630997				IPD	Male	40	59	NONE	08/25/09_TRO	NA	2	25	3	13	NA	28	1
GSM2630998				IPD	Female	56	59	NONE	08/25/09_TRO	NA	1	27	0	4	NA	15	1
GSM2630999				CONTROL	Female	NA	61	NONE	08/25/09_TRO	0	NA	30	NA	NA	0	NA	NA
GSM2631001				CONTROL	Male	NA	39	NONE	08/25/09_TRO	0	NA	29	NA	NA	0	NA	NA
GSM2631002				IPD	Male	44	49	NONE	08/25/09_TRO	1.5	NA	29	2	13	27	NA	8
GSM2631003				IPD	Female	50	69	NONE	08/25/09_TRO	NA	2.5	26	0	15	NA	31	4
GSM2631004				IPD	Female	65	67	NONE	08/25/09_TRO	NA	1.5	23	0	4	NA	14	0
GSM2631005				CONTROL	Female	NA	59	NONE	08/25/09_TRO	0	NA	26	NA	NA	0	NA	NA
GSM2631006				IPD	Male	58	60	NONE	08/25/09_TRO	NA	1	28	1	4	NA	11	0
GSM2631007				IPD	Male	59	64	NONE	08/25/09_TRO	4	NA	23	6	20	46	NA	0
GSM2631008				IPD	Male	58	71	NONE	08/26/09_TRO	NA	4	24	7	26	NA	34	8
GSM2631009				IPD	Male	53	54	NONE	08/26/09_TRO	NA	1	28	7	12	NA	14	2
GSM2631010				CONTROL	Female	NA	63	NONE	08/26/09_TRO	0	NA	23	NA	NA	0	NA	NA
GSM2631011				CONTROL	Male	NA	57	NONE	08/26/09_TRO	0	NA	28	NA	NA	0	NA	NA
GSM2631012				CONTROL	Male	NA	71	NONE	08/26/09_TRO	0	NA	27	NA	NA	0	NA	NA
GSM2631013				IPD	Male	67	69	NONE	08/26/09_TRO	NA	1	30	2	4	NA	4	0
GSM2631014				IPD	Male	54	60	NONE	08/26/09_TRO	NA	2	27	0	11	NA	14	2
GSM2631015				CONTROL	Female	NA	51	NONE	08/26/09_TRO	0	NA	29	NA	NA	0	NA	NA
GSM2631016				CONTROL	Female	NA	70	NONE	08/26/09_TRO	0	NA	30	NA	NA	0	NA	NA
GSM2631017				CONTROL	Female	NA	58	NONE	08/26/09_TRO	0	NA	23	NA	NA	2	NA	NA
GSM2631019				IPD	Female	NA	60	NONE	08/26/09_TRO	2	NA	26	3	3	17	NA	1
GSM2631020				CONTROL	Female	NA	60	NONE	09/16/09_TRO	0	NA	29	NA	NA	0	NA	NA
GSM2631021				IPD	Male	46	49	NONE	08/26/09_TRO	2	NA	29	1	18	19	NA	1
GSM2631022				CONTROL	Male	NA	50	NONE	08/26/09_TRO	0	NA	28	NA	NA	0	NA	NA
GSM2631023				CONTROL	Female	NA	62	NONE	08/26/09_TRO	0	NA	30	NA	NA	0	NA	NA
GSM2631024				CONTROL	Female	NA	58	NONE	08/27/09_TRO	0	NA	24	NA	NA	0	NA	NA
GSM2631025				CONTROL	Female	NA	65	NONE	08/26/09_TRO	0	NA	21	NA	NA	0	NA	NA
GSM2631026				CONTROL	Female	NA	71	NONE	08/26/09_TRO	0	NA	28	NA	NA	0	NA	NA
GSM2631027				CONTROL	Male	NA	62	NONE	08/26/09_TRO	0	NA	25	NA	NA	0	NA	NA
GSM2631028				CONTROL	Female	NA	82	NONE	08/26/09_TRO	0	NA	18	NA	NA	3	NA	NA
GSM2631029				CONTROL	Female	NA	58	NONE	08/26/09_TRO	0	NA	26	NA	NA	0	NA	NA
GSM2631030				IPD	Female	51	52	NONE	08/26/09_TRO	NA	1	25	1	7	NA	15	2
GSM2631031				CONTROL	Female	NA	79	NONE	08/26/09_TRO	0	NA	25	NA	NA	2	NA	NA
GSM2631032				CONTROL	Female	NA	57	NONE	08/26/09_TRO	0	NA	26	NA	NA	0	NA	NA
GSM2631033				CONTROL	Female	NA	60	NONE	08/26/09_TRO	0	NA	29	NA	NA	0	NA	NA
GSM2631035				IPD	Female	78	78	NONE	08/26/09_TRO	NA	1.5	23	0	13	NA	33	1
GSM2631036				IPD	Female	61	63	NONE	08/26/09_TRO	1.5	NA	18	8	11	45	NA	2
GSM2631037				CONTROL	Female	NA	65	NONE	08/26/09_TRO	0	NA	29	NA	NA	0	NA	NA
GSM2631038				CONTROL	Female	NA	71	NONE	08/26/09_TRO	0	NA	26	NA	NA	2	NA	NA
GSM2631039				CONTROL	Female	NA	42	NONE	08/26/09_TRO	0	NA	22	NA	NA	0	NA	NA
GSM2631040				CONTROL	Female	NA	60	NONE	09/03/09_TRO	0	NA	30	NA	NA	0	NA	NA
GSM2631041				CONTROL	Female	NA	58	NONE	09/03/09_TRO	0	NA	27	NA	NA	0	NA	NA
GSM2631042				CONTROL	Female	NA	69	NONE	09/03/09_TRO	0	NA	28	NA	NA	1	NA	NA
GSM2631043				CONTROL	Male	NA	67	NONE	09/03/09_TRO	0	NA	25	NA	NA	0	NA	NA
GSM2631044				CONTROL	Female	NA	54	NONE	09/03/09_TRO	0	NA	30	NA	NA	0	NA	NA
GSM2631045				CONTROL	Female	NA	69	NONE	09/03/09_TRO	0	NA	30	NA	NA	0	NA	NA
GSM2631046				CONTROL	Female	NA	57	NONE	09/03/09_TRO	0	NA	29	NA	NA	0	NA	NA
GSM2631047				CONTROL	Female	NA	71	NONE	09/03/09_TRO	0	NA	26	NA	NA	0	NA	NA
GSM2631048				IPD	Female	65	70	NONE	09/03/09_TRO	NA	1	24	2	5	NA	14	9
GSM2631049	x	x		CONTROL	Female	NA	59	NONE	09/16/09_TRO	0	NA	26	NA	NA	2	NA	NA
GSM2631050				IPD	Female	45	58	NONE	09/03/09_TRO	2.5	NA	25	5	8	44	NA	10
GSM2631051				IPD	Male	66	69	NONE	09/04/09_TRO	NA	1	29	0	7	NA	16	0
GSM2631052				IPD	Female	45	52	NONE	09/03/09_TRO	NA	2	26	0	4	NA	20	0
GSM2631053				IPD	Male	57	73	NONE	09/03/09_TRO	NA	4	22	4	27	NA	48	3
GSM2631054				CONTROL	Female	NA	45	NONE	09/03/09_TRO	0	NA	30	NA	NA	0	NA	NA
GSM2631055				CONTROL	Male	NA	62	NONE	09/03/09_TRO	0	NA	30	NA	NA	1	NA	NA
GSM2631056				CONTROL	Female	NA	49	NONE	09/03/09_TRO	0	NA	21	NA	NA	0	NA	NA
GSM2631057				CONTROL	Female	NA	67	NONE	09/03/09_TRO	0	NA	22	NA	NA	1	NA	NA
GSM2631058				CONTROL	Female	NA	62	NONE	09/03/09_TRO	0	NA	30	NA	NA	0	NA	NA
GSM2631059				CONTROL	Female	NA	65	NONE	09/03/09_TRO	0	NA	27	NA	NA	0	NA	NA
GSM2631060				IPD	Male	72	76	NONE	09/03/09_TRO	NA	2.5	24	3	10	NA	21	6
GSM2631061				CONTROL	Male	NA	60	NONE	09/03/09_TRO	0	NA	24	NA	NA	2	NA	NA
GSM2631064				CONTROL	Female	NA	72	NONE	09/03/09_TRO	0	NA	28	NA	NA	0	NA	NA
GSM2631065				CONTROL	Female	NA	55	NONE	09/03/09_TRO	0	NA	26	NA	NA	0	NA	NA
GSM2631066				IPD	Male	60	64	NONE	09/03/09_TRO	NA	1.5	18	3	10	NA	27	6
GSM2631067				IPD	Female	60	61	NONE	09/03/09_TRO	NA	1	29	2	9	NA	18	3
GSM2631068				CONTROL	Female	NA	63	NONE	09/03/09_TRO	0	NA	29	NA	NA	0	NA	NA
GSM2631070				CONTROL	Female	NA	72	NONE	09/03/09_TRO	0	NA	30	NA	NA	0	NA	NA
GSM2631071				IPD	Male	54	64	NONE	09/16/09_TRO	2	NA	29	6	10	37	NA	1
GSM2631072				CONTROL	Female	NA	69	NONE	09/03/09_TRO	0	NA	28	NA	NA	0	NA	NA
GSM2631073				CONTROL	Male	NA	67	NONE	09/02/09_TRO	0	NA	29	NA	NA	2	NA	NA
GSM2631074				CONTROL	Male	NA	56	NONE	09/02/09_TRO	0	NA	30	NA	NA	0	NA	NA
GSM2631075				CONTROL	Female	NA	70	NONE	09/02/09_TRO	0	NA	28	NA	NA	0	NA	NA
GSM2631076				CONTROL	Male	NA	61	NONE	09/02/09_TRO	0	NA	29	NA	NA	0	NA	NA
GSM2631077				CONTROL	Female	NA	62	NONE	09/02/09_TRO	0	NA	27	NA	NA	2	NA	NA
GSM2631078				IPD	Male	70	73	NONE	09/02/09_TRO	NA	1	ND	2	5	NA	9	1
GSM2631079				CONTROL	Male	NA	67	NONE	09/02/09_TRO	0	NA	27	NA	NA	0	NA	NA
GSM2631080				CONTROL	Female	NA	58	NONE	09/02/09_TRO	0	NA	30	NA	NA	0	NA	NA
GSM2631081				CONTROL	Female	NA	63	NONE	09/02/09_TRO	0	NA	30	NA	NA	0	NA	NA
GSM2631082				CONTROL	Female	NA	57	NONE	09/02/09_TRO	0	NA	26	NA	NA	0	NA	NA
GSM2631083				CONTROL	Male	NA	60	NONE	09/02/09_TRO	0	NA	29	NA	NA	0	NA	NA
GSM2631084				CONTROL	Female	NA	59	NONE	09/02/09_TRO	0	NA	28	NA	NA	1	NA	NA
GSM2631085				CONTROL	Female	NA	63	NONE	09/02/09_TRO	0	NA	27	NA	NA	1	NA	NA
GSM2631089				IPD	Female	63	63	NONE	09/02/09_TRO	NA	1	29	4	6	NA	10	0
GSM2631090				IPD	Female	65	67	NONE	09/02/09_TRO	1	NA	26	0	6	14	NA	2
GSM2631091	x			CONTROL	Female	NA	59	NONE	09/02/09_TRO	0	NA	24	NA	NA	0	NA	NA
GSM2631094				IPD	Male	62	66	NONE	09/03/09_TRO	1	NA	30	2	11	14	NA	3
GSM2631095				IPD	Female	51	60	NONE	09/03/09_TRO	NA	1	26	1	3	NA	4	3
GSM2631096				IPD	Male	49	53	NONE	09/03/09_TRO	NA	1	25	3	15	NA	12	9
GSM2631097				IPD	Female	60	66	NONE	09/04/09_TRO	ND	ND	30	2	4	NA	22	4
GSM2631099				IPD	Female	68	78	NONE	09/03/09_TRO	ND	ND	29	3	12	35	NA	5
GSM2631100				CONTROL	Male	NA	70	NONE	09/03/09_TRO	0	NA	20	NA	NA	0	NA	NA
GSM2631101				CONTROL	Female	NA	65	NONE	09/03/09_TRO	0	NA	25	NA	NA	0	NA	NA
GSM2631102				CONTROL	Female	NA	67	NONE	09/03/09_TRO	0	NA	23	NA	NA	0	NA	NA
GSM2631103				CONTROL	Female	NA	67	NONE	09/03/09_TRO	0	NA	23	NA	NA	0	NA	NA
GSM2631104				IPD	Male	65	69	NONE	09/03/09_TRO	3	NA	26	4	23	45	NA	2
GSM2631105				CONTROL	Male	NA	56	NONE	09/03/09_TRO	0	NA	26	NA	NA	0	NA	NA
GSM2631106				IPD	Female	68	69	NONE	09/03/09_TRO	NA	1	30	0	7	NA	21	2
GSM2631107				IPD	Male	60	77	NONE	09/03/09_TRO	NA	2.5	29	3	17	NA	36	5
GSM2631108				IPD	Male	43	60	NONE	09/03/09_TRO	NA	2	30	6	8	NA	6	3
GSM2631109				CONTROL	Female	NA	58	NONE	09/03/09_TRO	0	NA	26	NA	NA	0	NA	NA
GSM2631110				CONTROL	Female	NA	69	NONE	09/03/09_TRO	0	NA	22	NA	NA	2	NA	NA
GSM2631111				CONTROL	Female	NA	61	NONE	09/03/09_TRO	0	NA	27	NA	NA	0	NA	NA
GSM2631112				CONTROL	Female	NA	58	NONE	09/03/09_TRO	0	NA	29	NA	NA	0	NA	NA
GSM2631114				IPD	Female	47	52	NONE	09/03/09_TRO	NA	1	28	4	10	NA	13	3
GSM2631115				IPD	Male	60	63	NONE	09/04/09_TRO	NA	3	25	0	27	NA	62	8
GSM2631116				CONTROL	Female	NA	60	NONE	09/03/09_TRO	0	NA	30	NA	NA	0	NA	NA
GSM2631117				IPD	Male	47	50	NONE	09/03/09_TRO	1	NA	30	1	3	9	NA	3
GSM2631118				CONTROL	Male	NA	58	NONE	09/03/09_TRO	0	NA	21	NA	NA	0	NA	NA
GSM2631119				IPD	Female	41	42	NONE	09/03/09_TRO	NA	1	28	6	12	N	24	5
GSM2631120				IPD	Female	50	59	NONE	09/03/09_TRO	NA	1	29	1	11	N	8	5
GSM2631121				CONTROL	Male	NA	51	NONE	09/03/09_TRO	0	NA	30	NA	NA	0	NA	NA
GSM2631122				CONTROL	Male	NA	59	NONE	09/03/09_TRO	0	NA	30	NA	NA	0	NA	NA
GSM2631123				CONTROL	Female	NA	69	NONE	09/03/09_TRO	0	NA	29	NA	NA	1	NA	NA
GSM2631124				IPD	Female	41	42	NONE	09/03/09_TRO	NA	1	30	8	9	NA	12	3
GSM2631125				CONTROL	Female	NA	79	NONE	09/04/09_TRO	0	NA	25	NA	NA	0	NA	NA
GSM2631126				CONTROL	Female	NA	66	NONE	09/03/09_TRO	0	NA	26	NA	NA	0	NA	NA
GSM2631127				IPD	Male	35	39	NONE	09/03/09_TRO	1	NA	29	0	7	12	NA	1
GSM2631128				IPD	Male	70	71	NONE	09/03/09_TRO	NA	1	22	6	9	NA	10	1
GSM2631129				IPD	Male	67	71	NONE	09/02/09_TRO	NA	1	29	0	6	NA	18	1
GSM2631130				CONTROL	Female	NA	51	NONE	09/02/09_TRO	0	NA	26	NA	NA	0	NA	NA
GSM2631131				CONTROL	Female	NA	63	NONE	09/02/09_TRO	0	NA	26	NA	NA	0	NA	NA
GSM2631132				CONTROL	Female	NA	59	NONE	09/02/09_TRO	0	NA	30	NA	NA	0	NA	NA
GSM2631133				CONTROL	Female	NA	72	NONE	09/02/09_TRO	0	NA	30	NA	NA	0	NA	NA
GSM2631134				IPD	Male	56	59	NONE	09/02/09_TRO	1	NA	28	2	12	17	NA	1
GSM2631135				CONTROL	Male	NA	59	NONE	09/02/09_TRO	0	NA	29	NA	NA	3	NA	NA
GSM2631136				CONTROL	Female	NA	60	NONE	09/02/09_TRO	0	NA	28	NA	NA	0	NA	NA
GSM2631137	x	x		CONTROL	Female	NA	62	NONE	09/02/09_TRO	0	NA	28	NA	NA	0	NA	NA
GSM2631138				CONTROL	Female	NA	68	NONE	09/02/09_TRO	0	NA	16	NA	NA	0	NA	NA
GSM2631140				CONTROL	Female	NA	64	NONE	09/02/09_TRO	0	NA	30	NA	NA	0	NA	NA
GSM2631142	x	x		CONTROL	Female	NA	58	NONE	09/02/09_TRO	0	NA	29	NA	NA	0	NA	NA
GSM2631143				CONTROL	Female	NA	35	NONE	09/02/09_TRO	0	NA	24	NA	NA	0	NA	NA
GSM2631144				IPD	Male	55	65	NONE	09/02/09_TRO	NA	2	ND	3	10	NA	26	1
GSM2631146	x			IPD	Male	69	NA	NONE	02/18/10_L	0	9	0	4	9	0	16	0
GSM2631148				IPD	Female	59	NA	NONE	02/18/10_L	0	9	0	0	0	0	15	0
GSM2631149				CONTROL	Male	NA	NA	NONE	02/25/10_L	0	8	30	0	0	0	0	0
GSM2631150				IPD		NA	NA	NA	02/25/10_L	0	0	0	0	0	0	0	0
GSM2631151				IPD		NA	NA	NA	02/25/10_L	0	0	0	0	0	0	0	0
GSM2631152				CONTROL		NA	NA	NA	02/25/10_L	0	0	0	0	0	0	0	0
GSM2631153				CONTROL		NA	NA	NA	02/26/10_L	0	0	0	0	0	0	0	0
GSM2631154				IPD		NA	NA	NA	02/25/10_L	0	0	0	0	0	0	0	0
GSM2631155				IPD		NA	NA	NA	02/25/10_L	0	0	0	0	0	0	0	0
GSM2631156				IPD		NA	NA	NA	02/25/10_L	0	0	0	0	0	0	0	0
GSM2631157				IPD		NA	NA	NA	02/25/10_L	0	0	0	0	0	0	0	0
GSM2631158				CONTROL		NA	NA	NA	02/25/10_L	0	0	0	0	0	0	0	0
GSM2631159				CONTROL		NA	NA	NA	02/25/10_L	0	0	0	0	0	0	0	0
GSM2631160				IPD		NA	NA	NA	02/25/10_L	0	0	0	0	0	0	0	0
GSM2631161		x		CONTROL		NA	NA	NA	03/05/10_L	0	0	0	0	0	0	0	0
GSM2631162				CONTROL		NA	NA		03/05/10_L	0	0	0	0	0	0	0	0
GSM2631163				CONTROL		NA	NA	NA	03/05/10_L	0	0	0	0	0	0	0	0
GSM2631164				IPD		NA	NA	NA	03/05/10_L	0	0	0	0	0	0	0	0
GSM2631165				CONTROL		NA	NA	NA	03/05/10_L	0	0	0	0	0	0	0	0
GSM2631166				IPD		NA	NA	NA	03/05/10_L	0	0	0	0	0	0	0	0
GSM2631167				CONTROL		NA	NA	NA	03/05/10_L	0	0	0	0	0	0	0	0
GSM2631168				IPD		NA	NA	NA	03/05/10_L	0	0	0	0	0	0	0	0
GSM2631169				IPD		NA	NA	NA	03/05/10_L	0	0	0	0	0	0	0	0
GSM2631170				IPD		NA	NA	NA	03/05/10_L	0	0	0	0	0	0	0	0
GSM2631172				CONTROL		NA	NA		03/05/10_L	0	0	0	0	0	0	0	0
GSM2631173				CONTROL	Female	NA	NA	NONE	03/05/10_L	0	8	0	0	0	0	0	0
GSM2631175				CONTROL		NA	NA	NA	03/05/10_L	0	0	0	0	0	0	0	0
GSM2631176				CONTROL		NA	NA	NA	03/05/10_L	0	0	0	0	0	0	0	0
GSM2631177				CONTROL		NA	NA	NA	03/05/10_L	0	0	0	0	0	0	0	0
GSM2631178				IPD		NA	NA	NA	03/05/10_L	0	0	0	0	0	0	0	0
GSM2631179				CONTROL	Male	NA	58	NONE	03/05/10_TRO	0	NA	30	NA	NA	0	NA	NA
GSM2631180				CONTROL	Female	NA	75	NONE	03/05/10_TRO	0	NA	26	NA	NA	1	NA	NA
GSM2631181				CONTROL	Male	NA	58	NONE	03/05/10_TRO	0	NA	30	NA	NA	0	NA	NA
GSM2631182				IPD	Male	70	70	NONE	03/05/10_TRO	2	NA	25	3	8	21	NA	0
GSM2631183	x			IPD	Male	56	59	NONE	03/05/10_TRO	NA	1	30	4	10	NA	5	0
GSM2631184				IPD	Male	63	78	NONE	03/05/10_TRO	4	NA	ND	0	0	36	ND	0
GSM2631185				CONTROL	Female	NA	67	NONE	03/05/10_TRO	0	NA	28	NA	NA	0	NA	NA
GSM2631186				IPD	Female	61	74	NONE	03/05/10_TRO	NA	2.5	29	3	15	NA	31	6
GSM2631187				IPD	Female	69	72	NONE	03/05/10_TRO	NA	3	24	3	6	NA	43	1
GSM2631188				IPD	Female	40	50	NONE	03/05/10_TRO	NA	2	30	1	9	NA	9	7
GSM2631189				IPD	Female	72	74	NONE	03/05/10_TRO	NA	2.5	29	1	8	NA	18	0
GSM2631190				IPD	Female	50	53	NONE	03/05/10_TRO	NA	2	28	1	8	NA	24	1
GSM2631191				CONTROL	Female	NA	57	NONE	03/10/10_TRO	0	NA	28	NA	NA	1	NA	NA
GSM2631192				IPD	Female	55	60	NA	03/10/10_TRO	0	ND	ND	0	5	32	ND	2
GSM2631194				CONTROL	Male	NA	42	NA	03/10/10_TRO	0	0	0	NA	NA	0	NA	0
GSM2631195				CONTROL	Male	NA	49	NA	03/10/10_TRO	0	0	0	NA	NA	0	NA	0
GSM2631196				CONTROL	Male	NA	40	NA	03/10/10_TRO	0	0	0	NA	NA	0	NA	0
GSM2631197	x			CONTROL	Male	NA	43	NA	03/10/10_TRO	0	0	0	NA	NA	0	NA	0
GSM2631198	x	x		CONTROL	Male	NA	40	NA	03/10/10_TRO	0	NA	30	NA	NA	0	NA	NA
GSM2631200				IPD	Female	47	51	NA	03/10/10_TRO	1	NA	NA	NA	NA	18	NA	NA
GSM2631220				IPD	Male	64	NA	NONE	02/08/08_L	0	9	0	0	0	0	42	0
GSM2631221				CONTROL	Male	NA	NA	NONE	02/08/08_L	0	0	0	0	0	0	0	0
GSM2631224				IPD	Male	NA	NA	NONE	05/27/08_L	0	0	0	0	0	0	0	0
GSM2631225				IPD	Male	54	NA	NONE	06/19/08_L	0	9	0	0	0	0	0	0
GSM2631227				CONTROL	Female	NA	NA	NONE	08/28/09_L	0	0	0	0	0	0	0	0
GSM2631230				CONTROL	Male	NA	NA	NONE	08/28/09_L	0	0	0	0	0	0	0	0
GSM2631231				CONTROL	Female	NA	NA	NONE	08/28/09_L	0	0	0	0	0	0	0	0
GSM2631232				CONTROL	Male	NA	NA	NONE	08/28/09_L	0	0	0	0	0	0	0	0
GSM2631234				CONTROL	Male	NA	NA	NONE	09/01/09_L	0	0	0	0	0	0	0	0
GSM2631235				CONTROL	Female	NA	NA	NONE	09/01/09_L	0	0	0	0	0	0	0	0
GSM2631236				CONTROL	Female	NA	NA	NONE	09/01/09_L	0	0	0	0	0	0	0	0
GSM2631237				CONTROL	Male	NA	NA	NONE	09/01/09_L	0	0	0	0	0	0	0	0
GSM2631238				CONTROL	Female	NA	NA	NONE	09/01/09_L	0	0	0	0	0	0	0	0
GSM2631239				CONTROL	Female	NA	NA	NONE	09/01/09_L	0	0	0	0	0	0	0	0
GSM2631240				CONTROL	Male	NA	NA	NONE	09/01/09_L	0	0	0	0	0	0	0	0
GSM2631241				CONTROL	Female	NA	NA		09/01/09_L	0	0	0	0	0	0	0	0
GSM2631242				CONTROL	Male	NA	NA	NONE	09/01/09_L	0	0	0	0	0	0	0	0
GSM2631243				CONTROL	Female	NA	NA	NONE	09/01/09_L	0	0	0	0	0	0	0	0
GSM2631244				IPD	Male	NA	NA	NONE	09/02/09_L	0	0	0	0	0	0	0	0
GSM2631245				IPD	Male	NA	NA	NONE	09/01/09_L	0	0	0	0	0	0	0	0
GSM2631246				IPD	Male	NA	NA	NONE	09/01/09_L	0	0	0	0	0	0	0	0
GSM2631247				IPD	Male	NA	NA	NONE	09/01/09_L	0	0	0	0	0	0	0	0
GSM2631248				CONTROL	Male	NA	NA	NONE	09/01/09_L	0	0	0	0	0	0	0	0
GSM2631249				IPD	Female	NA	NA	NONE	09/01/09_L	0	0	0	0	0	0	0	0
GSM2631252				CONTROL	Female	NA	NA		09/01/09_L	0	0	0	0	0	0	0	0
GSM2631253				IPD	Male	52	58	NONE	09/01/09_TRO	NA	2	30	1	13	NA	17	0
GSM2631254				IPD	Male	45	54	NONE	09/01/09_TRO	NA	2	24	0	7	NA	25	0
GSM2631256				IPD	Female	51	63	NONE	09/01/09_TRO	4	3	28	1	17	33	NA	13
GSM2631257				IPD	Female	49	57	NONE	09/01/09_TRO	2.5	NA	30	4	11	23	NA	4
GSM2631258				IPD	Female	36	42	NONE	09/01/09_TRO	NA	1	29	1	5	NA	6	1
GSM2631259				IPD	Female	65	67	NONE	09/01/09_TRO	NA	1	ND	0	4	NA	14	0
GSM2631260				IPD	Female	47	54	NONE	09/01/09_TRO	NA	1	30	1	7	NA	16	1
GSM2631261				IPD	Female	69	74	NONE	09/01/09_TRO	NA	2.5	29	4	3	NA	20	4
GSM2631262				IPD	Female	62	66	NONE	09/01/09_TRO	2.5	NA	25	4	17	46	NA	4
GSM2631263				IPD	Female	44	47	NONE	09/01/09_TRO	NA	1	28	0	2	NA	10	2
GSM2631264				IPD	Female	67	71	NONE	09/01/09_TRO	1.5	NA	19	3	6	33	NA	2
GSM2631265				IPD	Female	64	70	NONE	09/01/09_TRO	1.5	NA	28	1	8	17	NA	4
GSM2631266				IPD	Male	63	67	NONE	09/01/09_TRO	NA	1	27	4	11	NA	11	3
GSM2631267				IPD	Female	64	69	NONE	09/01/09_TRO	NA	2	28	1	19	NA	29	0
GSM2631268				IPD	Male	64	77	NONE	09/02/09_TRO	NA	2	29	0	13	NA	26	1
GSM2631269				IPD	Male	67	70	NONE	09/02/09_TRO	NA	ND	27	2	4	NA	29	1
GSM2631271				IPD	Female	57	62	NONE	08/25/09_TRO	NA	2	30	0	6	NA	21	3
GSM2631272				CONTROL	Male	NA	74	NONE	08/25/09_TRO	0	NA	29	NA	NA	0	NA	NA
GSM2631273				CONTROL	Male	NA	52	NONE	08/25/09_TRO	0	NA	25	NA	NA	0	NA	NA
GSM2631274				CONTROL	Female	NA	78	NONE	08/26/09_TRO	0	NA	28	NA	NA	1	NA	NA
GSM2631275				CONTROL	Male	NA	74	NONE	08/26/09_TRO	0	NA	24	NA	NA	0	NA	NA
GSM2631276				CONTROL	Female	NA	70	NONE	08/26/09_TRO	0	NA	26	NA	NA	2	NA	NA
GSM2631277				CONTROL	Female	NA	69	NONE	08/26/09_TRO	0	NA	28	NA	NA	0	NA	NA
GSM2631278				CONTROL	Male	NA	75	NONE	08/26/09_TRO	0	NA	29	NA	NA	0	NA	NA
GSM2631279				CONTROL	Female	NA	62	NONE	08/26/09_TRO	0	NA	28	NA	NA	0	NA	NA
GSM2631280				CONTROL	Female	NA	62	NONE	08/26/09_TRO	0	NA	26	NA	NA	0	NA	NA
GSM2631281				CONTROL	Male	NA	78	NONE	08/26/09_TRO	0	NA	21	NA	NA	4	NA	NA
GSM2631283				CONTROL	Female	NA	61	NONE	09/03/09_TRO	0	NA	30	NA	NA	0	NA	NA
GSM2631284				CONTROL	Female	NA	61	NONE	09/03/09_TRO	0	NA	28	NA	NA	1	NA	NA
GSM2631287				CONTROL	Female	NA	63	NONE	09/03/09_TRO	0	NA	19	NA	NA	0	NA	NA
GSM2631289				CONTROL	Female	NA	62	NONE	09/02/09_TRO	0	NA	26	NA	NA	0	NA	NA
GSM2631290				IPD	Male	45	47	NONE	09/02/09_TRO	NA	2	29	0	7	NA	15	1
GSM2631291				IPD	Male	60	63	NONE	09/02/09_TRO	1	NA	25	1	5	NA	11	0
GSM2631293				IPD	Male	63	66	NONE	09/02/09_TRO	ND	ND	29	0	3	NA	2	1
GSM2631295				CONTROL	Female	NA	60	NONE	09/02/09_TRO	0	NA	30	NA	NA	0	NA	NA
GSM2631296				IPD	Male	57	67	NONE	09/02/09_TRO	NA	2.5	20	4	21	NA	26	9
GSM2631297	x			IPD	Male	46	50	NONE	09/02/09_TRO	NA	1	30	0	6	NA	2	2
GSM2631298				CONTROL		NA	NA	NA	02/25/10_L	0	0	0	0	0	0	0	0
GSM2631300				CONTROL		NA	NA	NA	02/25/10_L	0	0	0	0	0	0	0	0
GSM2631301				CONTROL		NA	NA	NA	02/25/10_L	0	0	0	0	0	0	0	0
GSM2631304				CONTROL		NA	NA	NA	03/05/10_L	0	0	0	0	0	0	0	0
GSM2631305				CONTROL		NA	NA	NA	03/05/10_L	0	0	0	0	0	0	0	0
GSM2631306				CONTROL		NA	NA		03/05/10_L	0	0	0	0	0	0	0	0
GSM2631310	x	x		CONTROL		NA	NA	NA	03/05/10_L	0	0	0	0	0	0	0	0
GSM2631312	x			CONTROL		NA	NA	NA	03/05/10_L	0	0	0	0	0	0	0	0
