# Supplementary material for: A Computational Analysis in a Cohort of Parkinson’s Disease Patients and Clock-Modified Colorectal Cancer Cells Reveals Common Expression Alterations in Clock-Regulated Genes
Source: Cancers (Basel). 2021 Nov 28;13(23):5978. doi: 10.3390/cancers13235978 (PMC8657387; doi:10.3390/cancers13235978)
Supplement: Supplementary file 1 [file cancers-13-05978-s001.zip › Supplementary_Files/Yalcinetal_Supplementary_Tables/Supplementary Table 2.xlsx]

## Sheet: Sheet1
Supplementary Table 2. The list of genes pre-selected from KEGG pathways in immune system module
Gene.stable.ID	Gene.description	Gene.name
ENSG00000274696	killer cell immunoglobulin like receptor, three Ig domains and long cytoplasmic tail 3 [Source:HGNC Symbol;Acc:HGNC:16312]	KIR3DL3
ENSG00000277484	killer cell immunoglobulin like receptor, two Ig domains and long cytoplasmic tail 3 [Source:HGNC Symbol;Acc:HGNC:6331]	KIR2DL3
ENSG00000278821	killer cell immunoglobulin like receptor, two Ig domains and long cytoplasmic tail 1 [Source:HGNC Symbol;Acc:HGNC:6329]	KIR2DL1
ENSG00000275452	killer cell immunoglobulin like receptor, two Ig domains and short cytoplasmic tail 2 [Source:HGNC Symbol;Acc:HGNC:6334]	KIR2DS2
ENSG00000277355	killer cell immunoglobulin like receptor, two Ig domains and long cytoplasmic tail 4 [Source:HGNC Symbol;Acc:HGNC:6332]	KIR2DL4
ENSG00000276011	killer cell immunoglobulin like receptor, two Ig domains and long cytoplasmic tail 2 [Source:HGNC Symbol;Acc:HGNC:6330]	KIR2DL2
ENSG00000278306	killer cell immunoglobulin like receptor, two Ig domains and short cytoplasmic tail 3 [Source:HGNC Symbol;Acc:HGNC:6335]	KIR2DS3
ENSG00000273775	killer cell immunoglobulin like receptor, three Ig domains and long cytoplasmic tail 1 [Source:HGNC Symbol;Acc:HGNC:6338]	KIR3DL1
ENSG00000274324	killer cell immunoglobulin like receptor, two Ig domains and short cytoplasmic tail 4 [Source:HGNC Symbol;Acc:HGNC:6336]	KIR2DS4
ENSG00000278758	killer cell immunoglobulin like receptor, three Ig domains and long cytoplasmic tail 2 [Source:HGNC Symbol;Acc:HGNC:6339]	KIR3DL2
ENSG00000278116	killer cell immunoglobulin like receptor, two Ig domains and long cytoplasmic tail 5A [Source:HGNC Symbol;Acc:HGNC:16345]	KIR2DL5A
ENSG00000276327	killer cell immunoglobulin like receptor, two Ig domains and short cytoplasmic tail 1 [Source:HGNC Symbol;Acc:HGNC:6333]	KIR2DS1
ENSG00000277334	natural cytotoxicity triggering receptor 1 [Source:HGNC Symbol;Acc:HGNC:6731]	NCR1
ENSG00000282110	mitogen-activated protein kinase 4 [Source:HGNC Symbol;Acc:HGNC:6878]	MAPK4
ENSG00000262795	interferon gamma receptor 2 [Source:HGNC Symbol;Acc:HGNC:5440]	IFNGR2
ENSG00000276068	NLR family apoptosis inhibitory protein [Source:HGNC Symbol;Acc:HGNC:7634]	NAIP
ENSG00000275555	delta like canonical Notch ligand 1 [Source:HGNC Symbol;Acc:HGNC:2908]	DLL1
ENSG00000276536	HRas proto-oncogene, GTPase [Source:HGNC Symbol;Acc:HGNC:5173]	HRAS
ENSG00000276561	interferon regulatory factor 7 [Source:HGNC Symbol;Acc:HGNC:6122]	IRF7
ENSG00000275444	defensin beta 4B [Source:HGNC Symbol;Acc:HGNC:30193]	DEFB4B
ENSG00000273641	defensin beta 103B [Source:HGNC Symbol;Acc:HGNC:31702]	DEFB103B
ENSG00000273884	leukocyte immunoglobulin like receptor A3 [Source:HGNC Symbol;Acc:HGNC:6604]	LILRA3
ENSG00000278355	leukocyte immunoglobulin like receptor A5 [Source:HGNC Symbol;Acc:HGNC:16309]	LILRA5
ENSG00000276798	leukocyte immunoglobulin like receptor A4 [Source:HGNC Symbol;Acc:HGNC:15503]	LILRA4
ENSG00000277177	leukocyte immunoglobulin like receptor A6 [Source:HGNC Symbol;Acc:HGNC:15495]	LILRA6
ENSG00000276838	serpin family F member 2 [Source:HGNC Symbol;Acc:HGNC:9075]	SERPINF2
ENSG00000277179	NLR family pyrin domain containing 7 [Source:HGNC Symbol;Acc:HGNC:22947]	NLRP7
ENSG00000278670	glycoprotein VI platelet [Source:HGNC Symbol;Acc:HGNC:14388]	GP6
ENSG00000275019	leukocyte immunoglobulin like receptor B3 [Source:HGNC Symbol;Acc:HGNC:6607]	LILRB3
ENSG00000274311	leukocyte immunoglobulin like receptor B5 [Source:HGNC Symbol;Acc:HGNC:6609]	LILRB5
ENSG00000282637	mitogen-activated protein kinase kinase kinase 14 [Source:HGNC Symbol;Acc:HGNC:6853]	MAP3K14
ENSG00000274513	leukocyte immunoglobulin like receptor B2 [Source:HGNC Symbol;Acc:HGNC:6606]	LILRB2
ENSG00000229698	major histocompatibility complex, class I, F [Source:HGNC Symbol;Acc:HGNC:4963]	HLA-F
ENSG00000278624	azurocidin 1 [Source:HGNC Symbol;Acc:HGNC:913]	AZU1
ENSG00000233095	major histocompatibility complex, class I, G [Source:HGNC Symbol;Acc:HGNC:4964]	HLA-G
ENSG00000273686	beta-2-microglobulin [Source:HGNC Symbol;Acc:HGNC:914]	B2M
ENSG00000277571	elastase, neutrophil expressed [Source:HGNC Symbol;Acc:HGNC:3309]	ELANE
ENSG00000274619	complement factor D [Source:HGNC Symbol;Acc:HGNC:2771]	CFD
ENSG00000223980	major histocompatibility complex, class I, A [Source:HGNC Symbol;Acc:HGNC:4931]	HLA-A
ENSG00000262418	protein tyrosine phosphatase receptor type C [Source:HGNC Symbol;Acc:HGNC:9666]	PTPRC
ENSG00000276452	leukocyte immunoglobulin like receptor B1 [Source:HGNC Symbol;Acc:HGNC:6605]	LILRB1
ENSG00000278006	C-C motif chemokine ligand 18 [Source:HGNC Symbol;Acc:HGNC:10616]	CCL18
ENSG00000278279	leukocyte immunoglobulin like receptor B4 [Source:HGNC Symbol;Acc:HGNC:6608]	LILRB4
ENSG00000278567	C-C motif chemokine ligand 3 [Source:HGNC Symbol;Acc:HGNC:10627]	CCL3
ENSG00000277943	C-C motif chemokine ligand 4 [Source:HGNC Symbol;Acc:HGNC:10630]	CCL4
ENSG00000277796	C-C motif chemokine ligand 3 like 1 [Source:HGNC Symbol;Acc:HGNC:10628]	CCL3L1
ENSG00000282604	C-C motif chemokine ligand 4 like 2 [Source:HGNC Symbol;Acc:HGNC:24066]	CCL4L2
ENSG00000278718	gasdermin D [Source:HGNC Symbol;Acc:HGNC:25697]	GSDMD
ENSG00000276977	programmed cell death 1 [Source:HGNC Symbol;Acc:HGNC:8760]	PDCD1
ENSG00000278634	leukocyte immunoglobulin like receptor A2 [Source:HGNC Symbol;Acc:HGNC:6603]	LILRA2
ENSG00000275565	arachidonate 5-lipoxygenase [Source:HGNC Symbol;Acc:HGNC:435]	ALOX5
ENSG00000277398	leukocyte immunoglobulin like receptor A1 [Source:HGNC Symbol;Acc:HGNC:6602]	LILRA1
ENSG00000273814	occludin [Source:HGNC Symbol;Acc:HGNC:8104]	OCLN
ENSG00000281988	G protein-coupled receptor kinase 1 [Source:HGNC Symbol;Acc:HGNC:10013]	GRK1
ENSG00000225201	major histocompatibility complex, class I, E [Source:HGNC Symbol;Acc:HGNC:4962]	HLA-E
ENSG00000275990	neutrophil cytosolic factor 4 [Source:HGNC Symbol;Acc:HGNC:7662]	NCF4
ENSG00000275199	AKT serine/threonine kinase 3 [Source:HGNC Symbol;Acc:HGNC:393]	AKT3
ENSG00000274474	tyrosine 3-monooxygenase/tryptophan 5-monooxygenase activation protein epsilon [Source:HGNC Symbol;Acc:HGNC:12851]	YWHAE
ENSG00000231179	MHC class I polypeptide-related sequence B [Source:HGNC Symbol;Acc:HGNC:7091]	MICB
ENSG00000274205	mitogen-activated protein kinase 15 [Source:HGNC Symbol;Acc:HGNC:24667]	MAPK15
ENSG00000228978	tumor necrosis factor [Source:HGNC Symbol;Acc:HGNC:11892]	TNF
ENSG00000274233	C-C motif chemokine ligand 5 [Source:HGNC Symbol;Acc:HGNC:10632]	CCL5
ENSG00000236315	natural cytotoxicity triggering receptor 3 [Source:HGNC Symbol;Acc:HGNC:19077]	NCR3
ENSG00000275095	C-C motif chemokine ligand 16 [Source:HGNC Symbol;Acc:HGNC:10614]	CCL16
ENSG00000277236	C-C motif chemokine ligand 14 [Source:HGNC Symbol;Acc:HGNC:10612]	CCL14
ENSG00000275528	C-C motif chemokine ligand 15 [Source:HGNC Symbol;Acc:HGNC:10613]	CCL15
ENSG00000276114	C-C motif chemokine ligand 23 [Source:HGNC Symbol;Acc:HGNC:10622]	CCL23
ENSG00000226704	heat shock protein family A (Hsp70) member 1 like [Source:HGNC Symbol;Acc:HGNC:5234]	HSPA1L
ENSG00000235941	heat shock protein family A (Hsp70) member 1A [Source:HGNC Symbol;Acc:HGNC:5232]	HSPA1A
ENSG00000232804	heat shock protein family A (Hsp70) member 1B [Source:HGNC Symbol;Acc:HGNC:5233]	HSPA1B
ENSG00000206435	major histocompatibility complex, class I, C [Source:HGNC Symbol;Acc:HGNC:4933]	HLA-C
ENSG00000228964	major histocompatibility complex, class I, B [Source:HGNC Symbol;Acc:HGNC:4932]	HLA-B
ENSG00000231268	advanced glycosylation end-product specific receptor [Source:HGNC Symbol;Acc:HGNC:320]	AGER
ENSG00000231225	MHC class I polypeptide-related sequence A [Source:HGNC Symbol;Acc:HGNC:7090]	MICA
ENSG00000280908	peptidyl arginine deiminase 4 [Source:HGNC Symbol;Acc:HGNC:18368]	PADI4
ENSG00000230463	major histocompatibility complex, class II, DR beta 3 [Source:HGNC Symbol;Acc:HGNC:4951]	HLA-DRB3
ENSG00000233192	major histocompatibility complex, class II, DQ alpha 2 [Source:HGNC Symbol;Acc:HGNC:4943]	HLA-DQA2
ENSG00000243612	major histocompatibility complex, class II, DO beta [Source:HGNC Symbol;Acc:HGNC:4937]	HLA-DOB
ENSG00000225967	transporter 2, ATP binding cassette subfamily B member [Source:HGNC Symbol;Acc:HGNC:44]	TAP2
ENSG00000227816	transporter 1, ATP binding cassette subfamily B member [Source:HGNC Symbol;Acc:HGNC:43]	TAP1
ENSG00000242092	major histocompatibility complex, class II, DM beta [Source:HGNC Symbol;Acc:HGNC:4935]	HLA-DMB
ENSG00000242361	major histocompatibility complex, class II, DM alpha [Source:HGNC Symbol;Acc:HGNC:4934]	HLA-DMA
ENSG00000235844	major histocompatibility complex, class II, DP alpha 1 [Source:HGNC Symbol;Acc:HGNC:4938]	HLA-DPA1
ENSG00000236693	major histocompatibility complex, class II, DP beta 1 [Source:HGNC Symbol;Acc:HGNC:4940]	HLA-DPB1
ENSG00000235696	complement C2 [Source:HGNC Symbol;Acc:HGNC:1248]	C2
ENSG00000242335	complement factor B [Source:HGNC Symbol;Acc:HGNC:1037]	CFB
ENSG00000172458	interleukin 17D [Source:HGNC Symbol;Acc:HGNC:5984]	IL17D
ENSG00000155313	ubiquitin specific peptidase 25 [Source:HGNC Symbol;Acc:HGNC:12624]	USP25
ENSG00000228454	complement C4B (Chido blood group) [Source:HGNC Symbol;Acc:HGNC:1324]	C4B
ENSG00000282854	ArfGAP with SH3 domain, ankyrin repeat and PH domain 3 [Source:HGNC Symbol;Acc:HGNC:14987]	ASAP3
ENSG00000227746	complement C4A (Rodgers blood group) [Source:HGNC Symbol;Acc:HGNC:1323]	C4A
ENSG00000177663	interleukin 17 receptor A [Source:HGNC Symbol;Acc:HGNC:5985]	IL17RA
ENSG00000132970	WASP family member 3 [Source:HGNC Symbol;Acc:HGNC:12734]	WASF3
ENSG00000226260	major histocompatibility complex, class II, DR alpha [Source:HGNC Symbol;Acc:HGNC:4947]	HLA-DRA
ENSG00000227826	major histocompatibility complex, class II, DR beta 4 [Source:HGNC Symbol;Acc:HGNC:4952]	HLA-DRB4
ENSG00000229074	major histocompatibility complex, class II, DR beta 1 [Source:HGNC Symbol;Acc:HGNC:4948]	HLA-DRB1
ENSG00000225890	major histocompatibility complex, class II, DQ alpha 1 [Source:HGNC Symbol;Acc:HGNC:4942]	HLA-DQA1
ENSG00000186184	RNA polymerase I and III subunit D [Source:HGNC Symbol;Acc:HGNC:20422]	POLR1D
ENSG00000225824	major histocompatibility complex, class II, DQ beta 1 [Source:HGNC Symbol;Acc:HGNC:4944]	HLA-DQB1
ENSG00000122025	fms related receptor tyrosine kinase 3 [Source:HGNC Symbol;Acc:HGNC:3765]	FLT3
ENSG00000015475	BH3 interacting domain death agonist [Source:HGNC Symbol;Acc:HGNC:1050]	BID
ENSG00000154721	junctional adhesion molecule 2 [Source:HGNC Symbol;Acc:HGNC:14686]	JAM2
ENSG00000125826	RANBP2-type and C3HC4-type zinc finger containing 1 [Source:HGNC Symbol;Acc:HGNC:15864]	RBCK1
ENSG00000282972	G protein subunit gamma 4 [Source:HGNC Symbol;Acc:HGNC:4407]	GNG4
ENSG00000231558	major histocompatibility complex, class II, DO alpha [Source:HGNC Symbol;Acc:HGNC:4936]	HLA-DOA
ENSG00000189403	high mobility group box 1 [Source:HGNC Symbol;Acc:HGNC:4983]	HMGB1
ENSG00000132965	arachidonate 5-lipoxygenase activating protein [Source:HGNC Symbol;Acc:HGNC:436]	ALOX5AP
ENSG00000231321	retinoid X receptor beta [Source:HGNC Symbol;Acc:HGNC:10478]	RXRB
ENSG00000282844	actinin alpha 4 [Source:HGNC Symbol;Acc:HGNC:166]	ACTN4
ENSG00000283158	mucin 5AC, oligomeric mucus/gel-forming [Source:HGNC Symbol;Acc:HGNC:7515]	MUC5AC
ENSG00000282905	NFKB inhibitor beta [Source:HGNC Symbol;Acc:HGNC:7798]	NFKBIB
ENSG00000156282	claudin 17 [Source:HGNC Symbol;Acc:HGNC:2038]	CLDN17
ENSG00000156284	claudin 8 [Source:HGNC Symbol;Acc:HGNC:2050]	CLDN8
ENSG00000156299	TIAM Rac1 associated GEF 1 [Source:HGNC Symbol;Acc:HGNC:11805]	TIAM1
ENSG00000184113	claudin 5 [Source:HGNC Symbol;Acc:HGNC:2047]	CLDN5
ENSG00000203618	glycoprotein Ib platelet subunit beta [Source:HGNC Symbol;Acc:HGNC:4440]	GP1BB
ENSG00000133111	regulatory factor X associated protein [Source:HGNC Symbol;Acc:HGNC:9988]	RFXAP
ENSG00000283777	calnexin [Source:HGNC Symbol;Acc:HGNC:1473]	CANX
ENSG00000206208	TAP binding protein [Source:HGNC Symbol;Acc:HGNC:11566]	TAPBP
ENSG00000198223	colony stimulating factor 2 receptor subunit alpha [Source:HGNC Symbol;Acc:HGNC:2435]	CSF2RA
ENSG00000284282	RNA polymerase III subunit E [Source:HGNC Symbol;Acc:HGNC:30347]	POLR3E
ENSG00000283780	mastermind like transcriptional coactivator 1 [Source:HGNC Symbol;Acc:HGNC:13632]	MAML1
ENSG00000185291	interleukin 3 receptor subunit alpha [Source:HGNC Symbol;Acc:HGNC:6012]	IL3RA
ENSG00000169100	solute carrier family 25 member 6 [Source:HGNC Symbol;Acc:HGNC:10992]	SLC25A6
ENSG00000159110	interferon alpha and beta receptor subunit 2 [Source:HGNC Symbol;Acc:HGNC:5433]	IFNAR2
ENSG00000002586	CD99 molecule (Xg blood group) [Source:HGNC Symbol;Acc:HGNC:7082]	CD99
ENSG00000142166	interferon alpha and beta receptor subunit 1 [Source:HGNC Symbol;Acc:HGNC:5432]	IFNAR1
ENSG00000288357	killer cell immunoglobulin like receptor, two Ig domains and short cytoplasmic tail 5 [Source:HGNC Symbol;Acc:HGNC:6337]	KIR2DS5
ENSG00000277377	serpin family A member 1 [Source:HGNC Symbol;Acc:HGNC:8941]	SERPINA1
ENSG00000099937	serpin family D member 1 [Source:HGNC Symbol;Acc:HGNC:4838]	SERPIND1
ENSG00000088888	mitochondrial antiviral signaling protein [Source:HGNC Symbol;Acc:HGNC:29233]	MAVS
ENSG00000099942	CRK like proto-oncogene, adaptor protein [Source:HGNC Symbol;Acc:HGNC:2363]	CRKL
ENSG00000234469	claudin 34 [Source:HGNC Symbol;Acc:HGNC:51259]	CLDN34
ENSG00000073464	chloride voltage-gated channel 4 [Source:HGNC Symbol;Acc:HGNC:2022]	CLCN4
ENSG00000285460	BCAR1 scaffold protein, Cas family member [Source:HGNC Symbol;Acc:HGNC:971]	BCAR1
ENSG00000285435	H3.4 histone [Source:HGNC Symbol;Acc:HGNC:4778]	H3-4
ENSG00000284841	H2A.W histone [Source:HGNC Symbol;Acc:HGNC:20507]	H2AW
ENSG00000285449	H2B.U histone 1 [Source:HGNC Symbol;Acc:HGNC:20514]	H2BU1
ENSG00000100030	mitogen-activated protein kinase 1 [Source:HGNC Symbol;Acc:HGNC:6871]	MAPK1
ENSG00000182621	phospholipase C beta 1 [Source:HGNC Symbol;Acc:HGNC:15917]	PLCB1
ENSG00000285136	defensin alpha 6 [Source:HGNC Symbol;Acc:HGNC:2765]	DEFA6
ENSG00000285318	defensin alpha 4 [Source:HGNC Symbol;Acc:HGNC:2763]	DEFA4
ENSG00000284983	defensin alpha 1 [Source:HGNC Symbol;Acc:HGNC:2761]	DEFA1
ENSG00000285176	defensin alpha 1B [Source:HGNC Symbol;Acc:HGNC:33596]	DEFA1B
ENSG00000284835	defensin alpha 3 [Source:HGNC Symbol;Acc:HGNC:2762]	DEFA3
ENSG00000285251	defensin alpha 5 [Source:HGNC Symbol;Acc:HGNC:2764]	DEFA5
ENSG00000080618	carboxypeptidase B2 [Source:HGNC Symbol;Acc:HGNC:2300]	CPB2
ENSG00000285376	defensin beta 103A [Source:HGNC Symbol;Acc:HGNC:15967]	DEFB103A
ENSG00000285132	cathepsin B [Source:HGNC Symbol;Acc:HGNC:2527]	CTSB
ENSG00000196664	toll like receptor 7 [Source:HGNC Symbol;Acc:HGNC:15631]	TLR7
ENSG00000101916	toll like receptor 8 [Source:HGNC Symbol;Acc:HGNC:15632]	TLR8
ENSG00000101333	phospholipase C beta 4 [Source:HGNC Symbol;Acc:HGNC:9059]	PLCB4
ENSG00000159216	RUNX family transcription factor 1 [Source:HGNC Symbol;Acc:HGNC:10471]	RUNX1
ENSG00000101349	p21 (RAC1) activated kinase 5 [Source:HGNC Symbol;Acc:HGNC:15916]	PAK5
ENSG00000285098	claudin 23 [Source:HGNC Symbol;Acc:HGNC:17591]	CLDN23
ENSG00000285181	defensin beta 4A [Source:HGNC Symbol;Acc:HGNC:2767]	DEFB4A
ENSG00000101384	jagged canonical Notch ligand 1 [Source:HGNC Symbol;Acc:HGNC:6188]	JAG1
ENSG00000159261	claudin 14 [Source:HGNC Symbol;Acc:HGNC:2035]	CLDN14
ENSG00000096968	Janus kinase 2 [Source:HGNC Symbol;Acc:HGNC:6192]	JAK2
ENSG00000288243	stimulator of interferon response cGAMP interactor 1 [Source:HGNC Symbol;Acc:HGNC:27962]	STING1
ENSG00000178372	calmodulin like 5 [Source:HGNC Symbol;Acc:HGNC:18180]	CALML5
ENSG00000178363	calmodulin like 3 [Source:HGNC Symbol;Acc:HGNC:1452]	CALML3
ENSG00000137033	interleukin 33 [Source:HGNC Symbol;Acc:HGNC:16028]	IL33
ENSG00000137265	interferon regulatory factor 4 [Source:HGNC Symbol;Acc:HGNC:6119]	IRF4
ENSG00000161980	RNA polymerase III subunit K [Source:HGNC Symbol;Acc:HGNC:14121]	POLR3K
ENSG00000134470	interleukin 15 receptor subunit alpha [Source:HGNC Symbol;Acc:HGNC:5978]	IL15RA
ENSG00000145949	myosin light chain kinase family member 4 [Source:HGNC Symbol;Acc:HGNC:27972]	MYLK4
ENSG00000134460	interleukin 2 receptor subunit alpha [Source:HGNC Symbol;Acc:HGNC:6008]	IL2RA
ENSG00000288199	lymphocyte specific protein 1 [Source:HGNC Symbol;Acc:HGNC:6707]	LSP1
ENSG00000137275	receptor interacting serine/threonine kinase 1 [Source:HGNC Symbol;Acc:HGNC:10019]	RIPK1
ENSG00000288512	complement C1r [Source:HGNC Symbol;Acc:HGNC:1246]	C1R
ENSG00000065675	protein kinase C theta [Source:HGNC Symbol;Acc:HGNC:9410]	PRKCQ
ENSG00000132664	RNA polymerase III subunit F [Source:HGNC Symbol;Acc:HGNC:15763]	POLR3F
ENSG00000100077	G protein-coupled receptor kinase 3 [Source:HGNC Symbol;Acc:HGNC:290]	GRK3
ENSG00000107485	GATA binding protein 3 [Source:HGNC Symbol;Acc:HGNC:4172]	GATA3
ENSG00000288185	interleukin 27 receptor subunit alpha [Source:HGNC Symbol;Acc:HGNC:17290]	IL27RA
ENSG00000124491	coagulation factor XIII A chain [Source:HGNC Symbol;Acc:HGNC:3531]	F13A1
ENSG00000288516	protein kinase cAMP-activated catalytic subunit alpha [Source:HGNC Symbol;Acc:HGNC:9380]	PRKACA
ENSG00000141934	phospholipid phosphatase 2 [Source:HGNC Symbol;Acc:HGNC:9230]	PLPP2
ENSG00000165416	SGT1 homolog, MIS12 kinetochore complex assembly cochaperone [Source:HGNC Symbol;Acc:HGNC:16987]	SUGT1
ENSG00000129946	SHC adaptor protein 2 [Source:HGNC Symbol;Acc:HGNC:29869]	SHC2
ENSG00000099866	mucosal vascular addressin cell adhesion molecule 1 [Source:HGNC Symbol;Acc:HGNC:6765]	MADCAM1
ENSG00000178726	thrombomodulin [Source:HGNC Symbol;Acc:HGNC:11784]	THBD
ENSG00000288292	claudin 7 [Source:HGNC Symbol;Acc:HGNC:2049]	CLDN7
ENSG00000171855	interferon beta 1 [Source:HGNC Symbol;Acc:HGNC:5434]	IFNB1
ENSG00000177047	interferon omega 1 [Source:HGNC Symbol;Acc:HGNC:5448]	IFNW1
ENSG00000137080	interferon alpha 21 [Source:HGNC Symbol;Acc:HGNC:5424]	IFNA21
ENSG00000236637	interferon alpha 4 [Source:HGNC Symbol;Acc:HGNC:5425]	IFNA4
ENSG00000214042	interferon alpha 7 [Source:HGNC Symbol;Acc:HGNC:5428]	IFNA7
ENSG00000186803	interferon alpha 10 [Source:HGNC Symbol;Acc:HGNC:5418]	IFNA10
ENSG00000147885	interferon alpha 16 [Source:HGNC Symbol;Acc:HGNC:5421]	IFNA16
ENSG00000234829	interferon alpha 17 [Source:HGNC Symbol;Acc:HGNC:5422]	IFNA17
ENSG00000228083	interferon alpha 14 [Source:HGNC Symbol;Acc:HGNC:5420]	IFNA14
ENSG00000147873	interferon alpha 5 [Source:HGNC Symbol;Acc:HGNC:5426]	IFNA5
ENSG00000120235	interferon alpha 6 [Source:HGNC Symbol;Acc:HGNC:5427]	IFNA6
ENSG00000233816	interferon alpha 13 [Source:HGNC Symbol;Acc:HGNC:5419]	IFNA13
ENSG00000188379	interferon alpha 2 [Source:HGNC Symbol;Acc:HGNC:5423]	IFNA2
ENSG00000120242	interferon alpha 8 [Source:HGNC Symbol;Acc:HGNC:5429]	IFNA8
ENSG00000197919	interferon alpha 1 [Source:HGNC Symbol;Acc:HGNC:5417]	IFNA1
ENSG00000091181	interleukin 5 receptor subunit alpha [Source:HGNC Symbol;Acc:HGNC:6017]	IL5RA
ENSG00000184995	interferon epsilon [Source:HGNC Symbol;Acc:HGNC:18163]	IFNE
ENSG00000281614	inositol polyphosphate-5-phosphatase D [Source:HGNC Symbol;Acc:HGNC:6079]	INPP5D
ENSG00000157625	TGF-beta activated kinase 1 (MAP3K7) binding protein 3 [Source:HGNC Symbol;Acc:HGNC:30681]	TAB3
ENSG00000281089	autophagy related 16 like 1 [Source:HGNC Symbol;Acc:HGNC:21498]	ATG16L1
ENSG00000127588	G protein subunit gamma 13 [Source:HGNC Symbol;Acc:HGNC:14131]	GNG13
ENSG00000150995	inositol 1,4,5-trisphosphate receptor type 1 [Source:HGNC Symbol;Acc:HGNC:6180]	ITPR1
ENSG00000147896	interferon kappa [Source:HGNC Symbol;Acc:HGNC:21714]	IFNK
ENSG00000174885	NLR family pyrin domain containing 6 [Source:HGNC Symbol;Acc:HGNC:22944]	NLRP6
ENSG00000171552	BCL2 like 1 [Source:HGNC Symbol;Acc:HGNC:992]	BCL2L1
ENSG00000099817	RNA polymerase II, I and III subunit E [Source:HGNC Symbol;Acc:HGNC:9192]	POLR2E
ENSG00000185885	interferon induced transmembrane protein 1 [Source:HGNC Symbol;Acc:HGNC:5412]	IFITM1
ENSG00000101306	myosin light chain kinase 2 [Source:HGNC Symbol;Acc:HGNC:16243]	MYLK2
ENSG00000107201	DExD/H-box helicase 58 [Source:HGNC Symbol;Acc:HGNC:19102]	DDX58
ENSG00000101336	HCK proto-oncogene, Src family tyrosine kinase [Source:HGNC Symbol;Acc:HGNC:4840]	HCK
ENSG00000198286	caspase recruitment domain family member 11 [Source:HGNC Symbol;Acc:HGNC:16393]	CARD11
ENSG00000165168	cytochrome b-245 beta chain [Source:HGNC Symbol;Acc:HGNC:2578]	CYBB
ENSG00000075624	actin beta [Source:HGNC Symbol;Acc:HGNC:132]	ACTB
ENSG00000134873	claudin 10 [Source:HGNC Symbol;Acc:HGNC:2033]	CLDN10
ENSG00000234289	H2B.S histone 1 [Source:HGNC Symbol;Acc:HGNC:4762]	H2BS1
ENSG00000137070	interleukin 11 receptor subunit alpha [Source:HGNC Symbol;Acc:HGNC:5967]	IL11RA
ENSG00000213927	C-C motif chemokine ligand 27 [Source:HGNC Symbol;Acc:HGNC:10626]	CCL27
ENSG00000136238	Rac family small GTPase 1 [Source:HGNC Symbol;Acc:HGNC:9801]	RAC1
ENSG00000172724	C-C motif chemokine ligand 19 [Source:HGNC Symbol;Acc:HGNC:10617]	CCL19
ENSG00000137077	C-C motif chemokine ligand 21 [Source:HGNC Symbol;Acc:HGNC:10620]	CCL21
ENSG00000215301	DEAD-box helicase 3 X-linked [Source:HGNC Symbol;Acc:HGNC:2745]	DDX3X
ENSG00000160223	inducible T cell costimulator ligand [Source:HGNC Symbol;Acc:HGNC:17087]	ICOSLG
ENSG00000177700	RNA polymerase II, I and III subunit L [Source:HGNC Symbol;Acc:HGNC:9199]	POLR2L
ENSG00000142185	transient receptor potential cation channel subfamily M member 2 [Source:HGNC Symbol;Acc:HGNC:12339]	TRPM2
ENSG00000182541	LIM domain kinase 2 [Source:HGNC Symbol;Acc:HGNC:6614]	LIMK2
ENSG00000164508	H2A clustered histone 1 [Source:HGNC Symbol;Acc:HGNC:18729]	H2AC1
ENSG00000146047	H2B clustered histone 1 [Source:HGNC Symbol;Acc:HGNC:18730]	H2BC1
ENSG00000241553	actin related protein 2/3 complex subunit 4 [Source:HGNC Symbol;Acc:HGNC:707]	ARPC4
ENSG00000160255	integrin subunit beta 2 [Source:HGNC Symbol;Acc:HGNC:6155]	ITGB2
ENSG00000275714	H3 clustered histone 1 [Source:HGNC Symbol;Acc:HGNC:4766]	H3C1
ENSG00000278637	H4 clustered histone 1 [Source:HGNC Symbol;Acc:HGNC:4781]	H4C1
ENSG00000278705	H4 clustered histone 2 [Source:HGNC Symbol;Acc:HGNC:4789]	H4C2
ENSG00000286522	H3 clustered histone 2 [Source:HGNC Symbol;Acc:HGNC:4776]	H3C2
ENSG00000278463	H2A clustered histone 4 [Source:HGNC Symbol;Acc:HGNC:4734]	H2AC4
ENSG00000276410	H2B clustered histone 3 [Source:HGNC Symbol;Acc:HGNC:4751]	H2BC3
ENSG00000287080	H3 clustered histone 3 [Source:HGNC Symbol;Acc:HGNC:4768]	H3C3
ENSG00000284916	proteasome activator subunit 1 [Source:HGNC Symbol;Acc:HGNC:9568]	PSME1
ENSG00000117983	mucin 5B, oligomeric mucus/gel-forming [Source:HGNC Symbol;Acc:HGNC:7516]	MUC5B
ENSG00000101608	myosin light chain 12A [Source:HGNC Symbol;Acc:HGNC:16701]	MYL12A
ENSG00000137101	CD72 molecule [Source:HGNC Symbol;Acc:HGNC:1696]	CD72
ENSG00000078902	toll interacting protein [Source:HGNC Symbol;Acc:HGNC:16476]	TOLLIP
ENSG00000118680	myosin light chain 12B [Source:HGNC Symbol;Acc:HGNC:29827]	MYL12B
ENSG00000284889	proteasome activator subunit 2 [Source:HGNC Symbol;Acc:HGNC:9569]	PSME2
ENSG00000006747	scinderin [Source:HGNC Symbol;Acc:HGNC:21695]	SCIN
ENSG00000197061	H4 clustered histone 3 [Source:HGNC Symbol;Acc:HGNC:4787]	H4C3
ENSG00000180596	H2B clustered histone 4 [Source:HGNC Symbol;Acc:HGNC:4757]	H2BC4
ENSG00000180573	H2A clustered histone 6 [Source:HGNC Symbol;Acc:HGNC:4733]	H2AC6
ENSG00000158373	H2B clustered histone 5 [Source:HGNC Symbol;Acc:HGNC:4747]	H2BC5
ENSG00000274290	H2B clustered histone 6 [Source:HGNC Symbol;Acc:HGNC:4753]	H2BC6
ENSG00000277157	H4 clustered histone 4 [Source:HGNC Symbol;Acc:HGNC:4782]	H4C4
ENSG00000163701	interleukin 17 receptor E [Source:HGNC Symbol;Acc:HGNC:18439]	IL17RE
ENSG00000197409	H3 clustered histone 4 [Source:HGNC Symbol;Acc:HGNC:4767]	H3C4
ENSG00000196866	H2A clustered histone 7 [Source:HGNC Symbol;Acc:HGNC:4729]	H2AC7
ENSG00000277224	H2B clustered histone 7 [Source:HGNC Symbol;Acc:HGNC:4752]	H2BC7
ENSG00000276966	H4 clustered histone 5 [Source:HGNC Symbol;Acc:HGNC:4790]	H4C5
ENSG00000273802	H2B clustered histone 8 [Source:HGNC Symbol;Acc:HGNC:4746]	H2BC8
ENSG00000277075	H2A clustered histone 8 [Source:HGNC Symbol;Acc:HGNC:4724]	H2AC8
ENSG00000274750	H3 clustered histone 6 [Source:HGNC Symbol;Acc:HGNC:4769]	H3C6
ENSG00000274618	H4 clustered histone 6 [Source:HGNC Symbol;Acc:HGNC:4783]	H4C6
ENSG00000275663	H4 clustered histone 7 [Source:HGNC Symbol;Acc:HGNC:4792]	H4C7
ENSG00000277775	H3 clustered histone 7 [Source:HGNC Symbol;Acc:HGNC:4773]	H3C7
ENSG00000275713	H2B clustered histone 9 [Source:HGNC Symbol;Acc:HGNC:4755]	H2BC9
ENSG00000273983	H3 clustered histone 8 [Source:HGNC Symbol;Acc:HGNC:4772]	H3C8
ENSG00000278588	H2B clustered histone 10 [Source:HGNC Symbol;Acc:HGNC:4756]	H2BC10
ENSG00000158406	H4 clustered histone 8 [Source:HGNC Symbol;Acc:HGNC:4788]	H4C8
ENSG00000285152	ring finger protein 31 [Source:HGNC Symbol;Acc:HGNC:16031]	RNF31
ENSG00000137076	talin 1 [Source:HGNC Symbol;Acc:HGNC:11845]	TLN1
ENSG00000163702	interleukin 17 receptor C [Source:HGNC Symbol;Acc:HGNC:18358]	IL17RC
ENSG00000285048	interferon regulatory factor 9 [Source:HGNC Symbol;Acc:HGNC:6131]	IRF9
ENSG00000101000	protein C receptor [Source:HGNC Symbol;Acc:HGNC:9452]	PROCR
ENSG00000077420	amyloid beta precursor protein binding family B member 1 interacting protein [Source:HGNC Symbol;Acc:HGNC:17379]	APBB1IP
ENSG00000102524	TNF superfamily member 13b [Source:HGNC Symbol;Acc:HGNC:11929]	TNFSF13B
ENSG00000176533	G protein subunit gamma 7 [Source:HGNC Symbol;Acc:HGNC:4410]	GNG7
ENSG00000124635	H2B clustered histone 11 [Source:HGNC Symbol;Acc:HGNC:4761]	H2BC11
ENSG00000196787	H2A clustered histone 11 [Source:HGNC Symbol;Acc:HGNC:4737]	H2AC11
ENSG00000276180	H4 clustered histone 9 [Source:HGNC Symbol;Acc:HGNC:4793]	H4C9
ENSG00000197903	H2B clustered histone 12 [Source:HGNC Symbol;Acc:HGNC:13954]	H2BC12
ENSG00000274997	H2A clustered histone 12 [Source:HGNC Symbol;Acc:HGNC:13671]	H2AC12
ENSG00000106546	aryl hydrocarbon receptor [Source:HGNC Symbol;Acc:HGNC:348]	AHR
ENSG00000185130	H2B clustered histone 13 [Source:HGNC Symbol;Acc:HGNC:4748]	H2BC13
ENSG00000196747	H2A clustered histone 13 [Source:HGNC Symbol;Acc:HGNC:4725]	H2AC13
ENSG00000278828	H3 clustered histone 10 [Source:HGNC Symbol;Acc:HGNC:4775]	H3C10
ENSG00000276368	H2A clustered histone 14 [Source:HGNC Symbol;Acc:HGNC:4727]	H2AC14
ENSG00000273703	H2B clustered histone 14 [Source:HGNC Symbol;Acc:HGNC:4750]	H2BC14
ENSG00000197238	H4 clustered histone 11 [Source:HGNC Symbol;Acc:HGNC:4785]	H4C11
ENSG00000273542	H4 clustered histone 12 [Source:HGNC Symbol;Acc:HGNC:4784]	H4C12
ENSG00000233822	H2B clustered histone 15 [Source:HGNC Symbol;Acc:HGNC:4749]	H2BC15
ENSG00000275221	H2A clustered histone 15 [Source:HGNC Symbol;Acc:HGNC:4726]	H2AC15
ENSG00000276903	H2A clustered histone 16 [Source:HGNC Symbol;Acc:HGNC:4730]	H2AC16
ENSG00000275379	H3 clustered histone 11 [Source:HGNC Symbol;Acc:HGNC:4771]	H3C11
ENSG00000275126	H4 clustered histone 13 [Source:HGNC Symbol;Acc:HGNC:4791]	H4C13
ENSG00000197153	H3 clustered histone 12 [Source:HGNC Symbol;Acc:HGNC:4774]	H3C12
ENSG00000278677	H2A clustered histone 17 [Source:HGNC Symbol;Acc:HGNC:4735]	H2AC17
ENSG00000274641	H2B clustered histone 17 [Source:HGNC Symbol;Acc:HGNC:4758]	H2BC17
ENSG00000215375	myosin light chain 5 [Source:HGNC Symbol;Acc:HGNC:7586]	MYL5
ENSG00000048052	histone deacetylase 9 [Source:HGNC Symbol;Acc:HGNC:14065]	HDAC9
ENSG00000110651	CD81 molecule [Source:HGNC Symbol;Acc:HGNC:1701]	CD81
ENSG00000151693	ArfGAP with SH3 domain, ankyrin repeat and PH domain 2 [Source:HGNC Symbol;Acc:HGNC:2721]	ASAP2
ENSG00000006638	thromboxane A2 receptor [Source:HGNC Symbol;Acc:HGNC:11608]	TBXA2R
ENSG00000186111	phosphatidylinositol-4-phosphate 5-kinase type 1 gamma [Source:HGNC Symbol;Acc:HGNC:8996]	PIP5K1C
ENSG00000078061	A-Raf proto-oncogene, serine/threonine kinase [Source:HGNC Symbol;Acc:HGNC:646]	ARAF
ENSG00000284814	adenylate cyclase 4 [Source:HGNC Symbol;Acc:HGNC:235]	ADCY4
ENSG00000197548	autophagy related 7 [Source:HGNC Symbol;Acc:HGNC:16935]	ATG7
ENSG00000057593	coagulation factor VII [Source:HGNC Symbol;Acc:HGNC:3544]	F7
ENSG00000136244	interleukin 6 [Source:HGNC Symbol;Acc:HGNC:6018]	IL6
ENSG00000126218	coagulation factor X [Source:HGNC Symbol;Acc:HGNC:3528]	F10
ENSG00000107968	mitogen-activated protein kinase kinase kinase 8 [Source:HGNC Symbol;Acc:HGNC:6860]	MAP3K8
ENSG00000285379	receptor interacting serine/threonine kinase 3 [Source:HGNC Symbol;Acc:HGNC:10021]	RIPK3
ENSG00000285485	nuclear factor of activated T cells 4 [Source:HGNC Symbol;Acc:HGNC:7778]	NFATC4
ENSG00000126934	mitogen-activated protein kinase kinase 2 [Source:HGNC Symbol;Acc:HGNC:6842]	MAP2K2
ENSG00000078295	adenylate cyclase 2 [Source:HGNC Symbol;Acc:HGNC:233]	ADCY2
ENSG00000100348	thioredoxin 2 [Source:HGNC Symbol;Acc:HGNC:17772]	TXN2
ENSG00000015285	WASP actin nucleation promoting factor [Source:HGNC Symbol;Acc:HGNC:12731]	WAS
ENSG00000094631	histone deacetylase 6 [Source:HGNC Symbol;Acc:HGNC:14064]	HDAC6
ENSG00000101335	myosin light chain 9 [Source:HGNC Symbol;Acc:HGNC:15754]	MYL9
ENSG00000150093	integrin subunit beta 1 [Source:HGNC Symbol;Acc:HGNC:6153]	ITGB1
ENSG00000134318	Rho associated coiled-coil containing protein kinase 2 [Source:HGNC Symbol;Acc:HGNC:10252]	ROCK2
ENSG00000132155	Raf-1 proto-oncogene, serine/threonine kinase [Source:HGNC Symbol;Acc:HGNC:9829]	RAF1
ENSG00000148498	par-3 family cell polarity regulator [Source:HGNC Symbol;Acc:HGNC:16051]	PARD3
ENSG00000140992	3-phosphoinositide dependent protein kinase 1 [Source:HGNC Symbol;Acc:HGNC:8816]	PDPK1
ENSG00000087266	SH3 domain binding protein 2 [Source:HGNC Symbol;Acc:HGNC:10825]	SH3BP2
ENSG00000100385	interleukin 2 receptor subunit beta [Source:HGNC Symbol;Acc:HGNC:6009]	IL2RB
ENSG00000167323	stromal interaction molecule 1 [Source:HGNC Symbol;Acc:HGNC:11386]	STIM1
ENSG00000187608	ISG15 ubiquitin like modifier [Source:HGNC Symbol;Acc:HGNC:4053]	ISG15
ENSG00000128340	Rac family small GTPase 2 [Source:HGNC Symbol;Acc:HGNC:9802]	RAC2
ENSG00000163517	histone deacetylase 11 [Source:HGNC Symbol;Acc:HGNC:19086]	HDAC11
ENSG00000068308	OTU deubiquitinase 5 [Source:HGNC Symbol;Acc:HGNC:25402]	OTUD5
ENSG00000197122	SRC proto-oncogene, non-receptor tyrosine kinase [Source:HGNC Symbol;Acc:HGNC:11283]	SRC
ENSG00000168495	RNA polymerase III subunit D [Source:HGNC Symbol;Acc:HGNC:1080]	POLR3D
ENSG00000127666	toll like receptor adaptor molecule 1 [Source:HGNC Symbol;Acc:HGNC:18348]	TICAM1
ENSG00000125388	G protein-coupled receptor kinase 4 [Source:HGNC Symbol;Acc:HGNC:4543]	GRK4
ENSG00000120910	protein phosphatase 3 catalytic subunit gamma [Source:HGNC Symbol;Acc:HGNC:9316]	PPP3CC
ENSG00000145555	myosin X [Source:HGNC Symbol;Acc:HGNC:7593]	MYO10
ENSG00000129988	lipopolysaccharide binding protein [Source:HGNC Symbol;Acc:HGNC:6517]	LBP
ENSG00000213937	claudin 9 [Source:HGNC Symbol;Acc:HGNC:2051]	CLDN9
ENSG00000184697	claudin 6 [Source:HGNC Symbol;Acc:HGNC:2048]	CLDN6
ENSG00000107242	phosphatidylinositol-4-phosphate 5-kinase type 1 beta [Source:HGNC Symbol;Acc:HGNC:8995]	PIP5K1B
ENSG00000165059	protein kinase cAMP-activated catalytic subunit gamma [Source:HGNC Symbol;Acc:HGNC:9382]	PRKACG
ENSG00000100142	RNA polymerase II, I and III subunit F [Source:HGNC Symbol;Acc:HGNC:9193]	POLR2F
ENSG00000067900	Rho associated coiled-coil containing protein kinase 1 [Source:HGNC Symbol;Acc:HGNC:10251]	ROCK1
ENSG00000184381	phospholipase A2 group VI [Source:HGNC Symbol;Acc:HGNC:9039]	PLA2G6
ENSG00000179388	early growth response 3 [Source:HGNC Symbol;Acc:HGNC:3240]	EGR3
ENSG00000124181	phospholipase C gamma 1 [Source:HGNC Symbol;Acc:HGNC:9065]	PLCG1
ENSG00000120889	TNF receptor superfamily member 10b [Source:HGNC Symbol;Acc:HGNC:11905]	TNFRSF10B
ENSG00000104689	TNF receptor superfamily member 10a [Source:HGNC Symbol;Acc:HGNC:11904]	TNFRSF10A
ENSG00000107562	C-X-C motif chemokine ligand 12 [Source:HGNC Symbol;Acc:HGNC:10672]	CXCL12
ENSG00000049768	forkhead box P3 [Source:HGNC Symbol;Acc:HGNC:6106]	FOXP3
ENSG00000171365	chloride voltage-gated channel 5 [Source:HGNC Symbol;Acc:HGNC:2023]	CLCN5
ENSG00000106100	nucleotide binding oligomerization domain containing 1 [Source:HGNC Symbol;Acc:HGNC:16390]	NOD1
ENSG00000167193	CRK proto-oncogene, adaptor protein [Source:HGNC Symbol;Acc:HGNC:2362]	CRK
ENSG00000100324	TGF-beta activated kinase 1 (MAP3K7) binding protein 1 [Source:HGNC Symbol;Acc:HGNC:18157]	TAB1
ENSG00000138031	adenylate cyclase 3 [Source:HGNC Symbol;Acc:HGNC:234]	ADCY3
ENSG00000103313	MEFV innate immuity regulator, pyrin [Source:HGNC Symbol;Acc:HGNC:6998]	MEFV
ENSG00000125730	complement C3 [Source:HGNC Symbol;Acc:HGNC:1318]	C3
ENSG00000100351	GRB2 related adaptor protein 2 [Source:HGNC Symbol;Acc:HGNC:4563]	GRAP2
ENSG00000120899	protein tyrosine kinase 2 beta [Source:HGNC Symbol;Acc:HGNC:9612]	PTK2B
ENSG00000124232	recombination signal binding protein for immunoglobulin kappa J region like [Source:HGNC Symbol;Acc:HGNC:13761]	RBPJL
ENSG00000078369	G protein subunit beta 1 [Source:HGNC Symbol;Acc:HGNC:4396]	GNB1
ENSG00000169885	calmodulin like 6 [Source:HGNC Symbol;Acc:HGNC:24193]	CALML6
ENSG00000141968	vav guanine nucleotide exchange factor 1 [Source:HGNC Symbol;Acc:HGNC:12657]	VAV1
ENSG00000156052	G protein subunit alpha q [Source:HGNC Symbol;Acc:HGNC:4390]	GNAQ
ENSG00000107643	mitogen-activated protein kinase 8 [Source:HGNC Symbol;Acc:HGNC:6881]	MAPK8
ENSG00000067606	protein kinase C zeta [Source:HGNC Symbol;Acc:HGNC:9412]	PRKCZ
ENSG00000120885	clusterin [Source:HGNC Symbol;Acc:HGNC:2095]	CLU
ENSG00000162104	adenylate cyclase 9 [Source:HGNC Symbol;Acc:HGNC:240]	ADCY9
ENSG00000168685	interleukin 7 receptor [Source:HGNC Symbol;Acc:HGNC:6024]	IL7R
ENSG00000100413	RNA polymerase III subunit H [Source:HGNC Symbol;Acc:HGNC:30349]	POLR3H
ENSG00000004468	CD38 molecule [Source:HGNC Symbol;Acc:HGNC:1667]	CD38
ENSG00000166090	interleukin 25 [Source:HGNC Symbol;Acc:HGNC:13765]	IL25
ENSG00000104921	Fc fragment of IgE receptor II [Source:HGNC Symbol;Acc:HGNC:3612]	FCER2
ENSG00000090659	CD209 molecule [Source:HGNC Symbol;Acc:HGNC:1641]	CD209
ENSG00000101695	ring finger protein 125 [Source:HGNC Symbol;Acc:HGNC:21150]	RNF125
ENSG00000185532	protein kinase cGMP-dependent 1 [Source:HGNC Symbol;Acc:HGNC:9414]	PRKG1
ENSG00000165471	mannose binding lectin 2 [Source:HGNC Symbol;Acc:HGNC:6922]	MBL2
ENSG00000104938	C-type lectin domain family 4 member M [Source:HGNC Symbol;Acc:HGNC:13523]	CLEC4M
ENSG00000159958	TNF receptor superfamily member 13C [Source:HGNC Symbol;Acc:HGNC:17755]	TNFRSF13C
ENSG00000076984	mitogen-activated protein kinase kinase 7 [Source:HGNC Symbol;Acc:HGNC:6847]	MAP2K7
ENSG00000066044	ELAV like RNA binding protein 1 [Source:HGNC Symbol;Acc:HGNC:3312]	ELAVL1
ENSG00000155849	engulfment and cell motility 1 [Source:HGNC Symbol;Acc:HGNC:16286]	ELMO1
ENSG00000131142	C-C motif chemokine ligand 25 [Source:HGNC Symbol;Acc:HGNC:10624]	CCL25
ENSG00000100985	matrix metallopeptidase 9 [Source:HGNC Symbol;Acc:HGNC:7176]	MMP9
ENSG00000078053	amphiphysin [Source:HGNC Symbol;Acc:HGNC:471]	AMPH
ENSG00000135047	cathepsin L [Source:HGNC Symbol;Acc:HGNC:2537]	CTSL
ENSG00000101017	CD40 molecule [Source:HGNC Symbol;Acc:HGNC:11919]	CD40
ENSG00000108405	purinergic receptor P2X 1 [Source:HGNC Symbol;Acc:HGNC:8533]	P2RX1
ENSG00000148082	SHC adaptor protein 3 [Source:HGNC Symbol;Acc:HGNC:18181]	SHC3
ENSG00000147065	moesin [Source:HGNC Symbol;Acc:HGNC:7373]	MSN
ENSG00000155659	V-set and immunoglobulin domain containing 4 [Source:HGNC Symbol;Acc:HGNC:17032]	VSIG4
ENSG00000165025	spleen associated tyrosine kinase [Source:HGNC Symbol;Acc:HGNC:11491]	SYK
ENSG00000163512	5-azacytidine induced 2 [Source:HGNC Symbol;Acc:HGNC:24002]	AZI2
ENSG00000113600	complement C9 [Source:HGNC Symbol;Acc:HGNC:1358]	C9
ENSG00000132357	caspase recruitment domain family member 6 [Source:HGNC Symbol;Acc:HGNC:16394]	CARD6
ENSG00000112936	complement C7 [Source:HGNC Symbol;Acc:HGNC:1346]	C7
ENSG00000163513	transforming growth factor beta receptor 2 [Source:HGNC Symbol;Acc:HGNC:11773]	TGFBR2
ENSG00000141480	arrestin beta 2 [Source:HGNC Symbol;Acc:HGNC:712]	ARRB2
ENSG00000133818	RAS related 2 [Source:HGNC Symbol;Acc:HGNC:17271]	RRAS2
ENSG00000039537	complement C6 [Source:HGNC Symbol;Acc:HGNC:1339]	C6
ENSG00000161921	C-X-C motif chemokine ligand 16 [Source:HGNC Symbol;Acc:HGNC:16642]	CXCL16
ENSG00000172575	RAS guanyl releasing protein 1 [Source:HGNC Symbol;Acc:HGNC:9878]	RASGRP1
ENSG00000129219	phospholipase D2 [Source:HGNC Symbol;Acc:HGNC:9068]	PLD2
ENSG00000127445	peptidylprolyl cis/trans isomerase, NIMA-interacting 1 [Source:HGNC Symbol;Acc:HGNC:8988]	PIN1
ENSG00000168214	recombination signal binding protein for immunoglobulin kappa J region [Source:HGNC Symbol;Acc:HGNC:5724]	RBPJ
ENSG00000183813	C-C motif chemokine receptor 4 [Source:HGNC Symbol;Acc:HGNC:1605]	CCR4
ENSG00000122877	early growth response 2 [Source:HGNC Symbol;Acc:HGNC:3239]	EGR2
ENSG00000213639	protein phosphatase 1 catalytic subunit beta [Source:HGNC Symbol;Acc:HGNC:9282]	PPP1CB
ENSG00000183230	catenin alpha 3 [Source:HGNC Symbol;Acc:HGNC:2511]	CTNNA3
ENSG00000185245	glycoprotein Ib platelet subunit alpha [Source:HGNC Symbol;Acc:HGNC:4439]	GP1BA
ENSG00000151882	C-C motif chemokine ligand 28 [Source:HGNC Symbol;Acc:HGNC:17700]	CCL28
ENSG00000147168	interleukin 2 receptor subunit gamma [Source:HGNC Symbol;Acc:HGNC:6010]	IL2RG
ENSG00000106631	myosin light chain 7 [Source:HGNC Symbol;Acc:HGNC:21719]	MYL7
ENSG00000137843	p21 (RAC1) activated kinase 6 [Source:HGNC Symbol;Acc:HGNC:16061]	PAK6
ENSG00000259288	BUB1B-PAK6 readthrough [Source:HGNC Symbol;Acc:HGNC:52276]	BUB1B-PAK6
ENSG00000137841	phospholipase C beta 2 [Source:HGNC Symbol;Acc:HGNC:9055]	PLCB2
ENSG00000179583	class II major histocompatibility complex transactivator [Source:HGNC Symbol;Acc:HGNC:7067]	CIITA
ENSG00000090339	intercellular adhesion molecule 1 [Source:HGNC Symbol;Acc:HGNC:5344]	ICAM1
ENSG00000105397	tyrosine kinase 2 [Source:HGNC Symbol;Acc:HGNC:12440]	TYK2
ENSG00000174125	toll like receptor 1 [Source:HGNC Symbol;Acc:HGNC:11847]	TLR1
ENSG00000174130	toll like receptor 6 [Source:HGNC Symbol;Acc:HGNC:16711]	TLR6
ENSG00000005100	DEAH-box helicase 33 [Source:HGNC Symbol;Acc:HGNC:16718]	DHX33
ENSG00000213949	integrin subunit alpha 1 [Source:HGNC Symbol;Acc:HGNC:6134]	ITGA1
ENSG00000091106	NLR family CARD domain containing 4 [Source:HGNC Symbol;Acc:HGNC:16412]	NLRC4
ENSG00000164171	integrin subunit alpha 2 [Source:HGNC Symbol;Acc:HGNC:6137]	ITGA2
ENSG00000091592	NLR family pyrin domain containing 1 [Source:HGNC Symbol;Acc:HGNC:14374]	NLRP1
ENSG00000124126	phosphatidylinositol-3,4,5-trisphosphate dependent Rac exchange factor 1 [Source:HGNC Symbol;Acc:HGNC:32594]	PREX1
ENSG00000048462	TNF receptor superfamily member 17 [Source:HGNC Symbol;Acc:HGNC:11913]	TNFRSF17
ENSG00000100429	histone deacetylase 10 [Source:HGNC Symbol;Acc:HGNC:18128]	HDAC10
ENSG00000128917	delta like canonical Notch ligand 4 [Source:HGNC Symbol;Acc:HGNC:2910]	DLL4
ENSG00000186810	C-X-C motif chemokine receptor 3 [Source:HGNC Symbol;Acc:HGNC:4540]	CXCR3
ENSG00000171608	phosphatidylinositol-4,5-bisphosphate 3-kinase catalytic subunit delta [Source:HGNC Symbol;Acc:HGNC:8977]	PIK3CD
ENSG00000152689	RAS guanyl releasing protein 3 [Source:HGNC Symbol;Acc:HGNC:14545]	RASGRP3
ENSG00000105968	H2A.Z variant histone 2 [Source:HGNC Symbol;Acc:HGNC:20664]	H2AZ2
ENSG00000188130	mitogen-activated protein kinase 12 [Source:HGNC Symbol;Acc:HGNC:6874]	MAPK12
ENSG00000110799	von Willebrand factor [Source:HGNC Symbol;Acc:HGNC:12726]	VWF
ENSG00000147099	histone deacetylase 8 [Source:HGNC Symbol;Acc:HGNC:13315]	HDAC8
ENSG00000079805	dynamin 2 [Source:HGNC Symbol;Acc:HGNC:2974]	DNM2
ENSG00000175387	SMAD family member 2 [Source:HGNC Symbol;Acc:HGNC:6768]	SMAD2
ENSG00000010278	CD9 molecule [Source:HGNC Symbol;Acc:HGNC:1709]	CD9
ENSG00000185386	mitogen-activated protein kinase 11 [Source:HGNC Symbol;Acc:HGNC:6873]	MAPK11
ENSG00000168421	ras homolog family member H [Source:HGNC Symbol;Acc:HGNC:686]	RHOH
ENSG00000100448	cathepsin G [Source:HGNC Symbol;Acc:HGNC:2532]	CTSG
ENSG00000100453	granzyme B [Source:HGNC Symbol;Acc:HGNC:4709]	GZMB
ENSG00000067113	phospholipid phosphatase 1 [Source:HGNC Symbol;Acc:HGNC:9228]	PLPP1
ENSG00000111321	lymphotoxin beta receptor [Source:HGNC Symbol;Acc:HGNC:6718]	LTBR
ENSG00000164742	adenylate cyclase 1 [Source:HGNC Symbol;Acc:HGNC:232]	ADCY1
ENSG00000172216	CCAAT enhancer binding protein beta [Source:HGNC Symbol;Acc:HGNC:1834]	CEBPB
ENSG00000106799	transforming growth factor beta receptor 1 [Source:HGNC Symbol;Acc:HGNC:11772]	TGFBR1
ENSG00000134352	interleukin 6 signal transducer [Source:HGNC Symbol;Acc:HGNC:6021]	IL6ST
ENSG00000168970	JMJD7-PLA2G4B readthrough [Source:HGNC Symbol;Acc:HGNC:34449]	JMJD7-PLA2G4B
ENSG00000099284	macroH2A.2 histone [Source:HGNC Symbol;Acc:HGNC:14453]	MACROH2A2
ENSG00000101096	nuclear factor of activated T cells 2 [Source:HGNC Symbol;Acc:HGNC:7776]	NFATC2
ENSG00000243708	phospholipase A2 group IVB [Source:HGNC Symbol;Acc:HGNC:9036]	PLA2G4B
ENSG00000198502	major histocompatibility complex, class II, DR beta 5 [Source:HGNC Symbol;Acc:HGNC:4953]	HLA-DRB5
ENSG00000188089	phospholipase A2 group IVE [Source:HGNC Symbol;Acc:HGNC:24791]	PLA2G4E
ENSG00000159337	phospholipase A2 group IVD [Source:HGNC Symbol;Acc:HGNC:30038]	PLA2G4D
ENSG00000095015	mitogen-activated protein kinase kinase kinase 1 [Source:HGNC Symbol;Acc:HGNC:6848]	MAP3K1
ENSG00000168907	phospholipase A2 group IVF [Source:HGNC Symbol;Acc:HGNC:27396]	PLA2G4F
ENSG00000180644	perforin 1 [Source:HGNC Symbol;Acc:HGNC:9360]	PRF1
ENSG00000009724	mannan binding lectin serine peptidase 2 [Source:HGNC Symbol;Acc:HGNC:6902]	MASP2
ENSG00000188386	protein phosphatase 3 regulatory subunit B, beta [Source:HGNC Symbol;Acc:HGNC:9318]	PPP3R2
ENSG00000198793	mechanistic target of rapamycin kinase [Source:HGNC Symbol;Acc:HGNC:3942]	MTOR
ENSG00000100852	Rho GTPase activating protein 5 [Source:HGNC Symbol;Acc:HGNC:675]	ARHGAP5
ENSG00000170296	GABA type A receptor-associated protein [Source:HGNC Symbol;Acc:HGNC:4067]	GABARAP
ENSG00000172936	MYD88 innate immune signal transduction adaptor [Source:HGNC Symbol;Acc:HGNC:7562]	MYD88
ENSG00000156026	mitochondrial calcium uniporter [Source:HGNC Symbol;Acc:HGNC:23526]	MCU
ENSG00000165410	cofilin 2 [Source:HGNC Symbol;Acc:HGNC:1875]	CFL2
ENSG00000187266	erythropoietin receptor [Source:HGNC Symbol;Acc:HGNC:3416]	EPOR
ENSG00000104368	plasminogen activator, tissue type [Source:HGNC Symbol;Acc:HGNC:9051]	PLAT
ENSG00000141646	SMAD family member 4 [Source:HGNC Symbol;Acc:HGNC:6770]	SMAD4
ENSG00000116688	mitofusin 2 [Source:HGNC Symbol;Acc:HGNC:16877]	MFN2
ENSG00000104365	inhibitor of nuclear factor kappa B kinase subunit beta [Source:HGNC Symbol;Acc:HGNC:5960]	IKBKB
ENSG00000107758	protein phosphatase 3 catalytic subunit beta [Source:HGNC Symbol;Acc:HGNC:9315]	PPP3CB
ENSG00000100906	NFKB inhibitor alpha [Source:HGNC Symbol;Acc:HGNC:7797]	NFKBIA
ENSG00000124256	Z-DNA binding protein 1 [Source:HGNC Symbol;Acc:HGNC:16176]	ZBP1
ENSG00000078668	voltage dependent anion channel 3 [Source:HGNC Symbol;Acc:HGNC:12674]	VDAC3
ENSG00000161955	TNF superfamily member 13 [Source:HGNC Symbol;Acc:HGNC:11928]	TNFSF13
ENSG00000092531	synaptosome associated protein 23 [Source:HGNC Symbol;Acc:HGNC:11131]	SNAP23
ENSG00000074966	TXK tyrosine kinase [Source:HGNC Symbol;Acc:HGNC:12434]	TXK
ENSG00000135605	tec protein tyrosine kinase [Source:HGNC Symbol;Acc:HGNC:11719]	TEC
ENSG00000136810	thioredoxin [Source:HGNC Symbol;Acc:HGNC:12435]	TXN
ENSG00000010610	CD4 molecule [Source:HGNC Symbol;Acc:HGNC:1678]	CD4
ENSG00000122861	plasminogen activator, urokinase [Source:HGNC Symbol;Acc:HGNC:9052]	PLAU
ENSG00000035403	vinculin [Source:HGNC Symbol;Acc:HGNC:12665]	VCL
ENSG00000087460	GNAS complex locus [Source:HGNC Symbol;Acc:HGNC:4392]	GNAS
ENSG00000168329	C-X3-C motif chemokine receptor 1 [Source:HGNC Symbol;Acc:HGNC:2558]	CX3CR1
ENSG00000179934	C-C motif chemokine receptor 8 [Source:HGNC Symbol;Acc:HGNC:1609]	CCR8
ENSG00000010671	Bruton tyrosine kinase [Source:HGNC Symbol;Acc:HGNC:1133]	BTK
ENSG00000111664	G protein subunit beta 3 [Source:HGNC Symbol;Acc:HGNC:4400]	GNB3
ENSG00000112851	erbb2 interacting protein [Source:HGNC Symbol;Acc:HGNC:15842]	ERBIN
ENSG00000096433	inositol 1,4,5-trisphosphate receptor type 3 [Source:HGNC Symbol;Acc:HGNC:6182]	ITPR3
ENSG00000242616	G protein subunit gamma 10 [Source:HGNC Symbol;Acc:HGNC:4402]	GNG10
ENSG00000171132	protein kinase C epsilon [Source:HGNC Symbol;Acc:HGNC:9401]	PRKCE
ENSG00000067369	tumor protein p53 binding protein 1 [Source:HGNC Symbol;Acc:HGNC:11999]	TP53BP1
ENSG00000111679	protein tyrosine phosphatase non-receptor type 6 [Source:HGNC Symbol;Acc:HGNC:9658]	PTPN6
ENSG00000168036	catenin beta 1 [Source:HGNC Symbol;Acc:HGNC:2514]	CTNNB1
ENSG00000179218	calreticulin [Source:HGNC Symbol;Acc:HGNC:1455]	CALR
ENSG00000145675	phosphoinositide-3-kinase regulatory subunit 1 [Source:HGNC Symbol;Acc:HGNC:8979]	PIK3R1
ENSG00000165637	voltage dependent anion channel 2 [Source:HGNC Symbol;Acc:HGNC:12672]	VDAC2
ENSG00000182326	complement C1s [Source:HGNC Symbol;Acc:HGNC:1247]	C1S
ENSG00000143933	calmodulin 2 [Source:HGNC Symbol;Acc:HGNC:1445]	CALM2
ENSG00000157404	KIT proto-oncogene, receptor tyrosine kinase [Source:HGNC Symbol;Acc:HGNC:6342]	KIT
ENSG00000123569	H2B.W histone 1 [Source:HGNC Symbol;Acc:HGNC:27252]	H2BW1
ENSG00000101812	H2B.W histone 2 [Source:HGNC Symbol;Acc:HGNC:27867]	H2BW2
ENSG00000165376	claudin 2 [Source:HGNC Symbol;Acc:HGNC:2041]	CLDN2
ENSG00000167004	protein disulfide isomerase family A member 3 [Source:HGNC Symbol;Acc:HGNC:4606]	PDIA3
ENSG00000165527	ADP ribosylation factor 6 [Source:HGNC Symbol;Acc:HGNC:659]	ARF6
ENSG00000085063	CD59 molecule (CD59 blood group) [Source:HGNC Symbol;Acc:HGNC:1689]	CD59
ENSG00000112062	mitogen-activated protein kinase 14 [Source:HGNC Symbol;Acc:HGNC:6876]	MAPK14
ENSG00000136869	toll like receptor 4 [Source:HGNC Symbol;Acc:HGNC:11850]	TLR4
ENSG00000156711	mitogen-activated protein kinase 13 [Source:HGNC Symbol;Acc:HGNC:6875]	MAPK13
ENSG00000254087	LYN proto-oncogene, Src family tyrosine kinase [Source:HGNC Symbol;Acc:HGNC:6735]	LYN
ENSG00000171860	complement C3a receptor 1 [Source:HGNC Symbol;Acc:HGNC:1319]	C3AR1
ENSG00000205846	C-type lectin domain containing 6A [Source:HGNC Symbol;Acc:HGNC:14556]	CLEC6A
ENSG00000166527	C-type lectin domain family 4 member D [Source:HGNC Symbol;Acc:HGNC:14554]	CLEC4D
ENSG00000166523	C-type lectin domain family 4 member E [Source:HGNC Symbol;Acc:HGNC:14555]	CLEC4E
ENSG00000111732	activation induced cytidine deaminase [Source:HGNC Symbol;Acc:HGNC:13203]	AICDA
ENSG00000276231	phosphoinositide-3-kinase regulatory subunit 6 [Source:HGNC Symbol;Acc:HGNC:27101]	PIK3R6
ENSG00000141506	phosphoinositide-3-kinase regulatory subunit 5 [Source:HGNC Symbol;Acc:HGNC:30035]	PIK3R5
ENSG00000026508	CD44 molecule (Indian blood group) [Source:HGNC Symbol;Acc:HGNC:1681]	CD44
ENSG00000077264	p21 (RAC1) activated kinase 3 [Source:HGNC Symbol;Acc:HGNC:8592]	PAK3
ENSG00000165215	claudin 3 [Source:HGNC Symbol;Acc:HGNC:2045]	CLDN3
ENSG00000189143	claudin 4 [Source:HGNC Symbol;Acc:HGNC:2046]	CLDN4
ENSG00000106804	complement C5 [Source:HGNC Symbol;Acc:HGNC:1331]	C5
ENSG00000148180	gelsolin [Source:HGNC Symbol;Acc:HGNC:4620]	GSN
ENSG00000186469	G protein subunit gamma 2 [Source:HGNC Symbol;Acc:HGNC:4404]	GNG2
ENSG00000175899	alpha-2-macroglobulin [Source:HGNC Symbol;Acc:HGNC:7]	A2M
ENSG00000166501	protein kinase C beta [Source:HGNC Symbol;Acc:HGNC:9395]	PRKCB
ENSG00000095303	prostaglandin-endoperoxide synthase 1 [Source:HGNC Symbol;Acc:HGNC:9604]	PTGS1
ENSG00000165682	C-type lectin domain family 1 member B [Source:HGNC Symbol;Acc:HGNC:24356]	CLEC1B
ENSG00000172175	MALT1 paracaspase [Source:HGNC Symbol;Acc:HGNC:6819]	MALT1
ENSG00000172243	C-type lectin domain containing 7A [Source:HGNC Symbol;Acc:HGNC:14558]	CLEC7A
ENSG00000001167	nuclear transcription factor Y subunit alpha [Source:HGNC Symbol;Acc:HGNC:7804]	NFYA
ENSG00000065559	mitogen-activated protein kinase kinase 4 [Source:HGNC Symbol;Acc:HGNC:6844]	MAP2K4
ENSG00000139112	GABA type A receptor associated protein like 1 [Source:HGNC Symbol;Acc:HGNC:4068]	GABARAPL1
ENSG00000096264	natural cytotoxicity triggering receptor 2 [Source:HGNC Symbol;Acc:HGNC:6732]	NCR2
ENSG00000134539	killer cell lectin like receptor D1 [Source:HGNC Symbol;Acc:HGNC:6378]	KLRD1
ENSG00000255819	KLRC4-KLRK1 readthrough [Source:HGNC Symbol;Acc:HGNC:48357]	KLRC4-KLRK1
ENSG00000005022	solute carrier family 25 member 5 [Source:HGNC Symbol;Acc:HGNC:10991]	SLC25A5
ENSG00000173585	C-C motif chemokine receptor 9 [Source:HGNC Symbol;Acc:HGNC:1610]	CCR9
ENSG00000175104	TNF receptor associated factor 6 [Source:HGNC Symbol;Acc:HGNC:12036]	TRAF6
ENSG00000077238	interleukin 4 receptor [Source:HGNC Symbol;Acc:HGNC:6015]	IL4R
ENSG00000123143	protein kinase N1 [Source:HGNC Symbol;Acc:HGNC:9405]	PKN1
ENSG00000213809	killer cell lectin like receptor K1 [Source:HGNC Symbol;Acc:HGNC:18788]	KLRK1
ENSG00000172215	C-X-C motif chemokine receptor 6 [Source:HGNC Symbol;Acc:HGNC:16647]	CXCR6
ENSG00000173578	X-C motif chemokine receptor 1 [Source:HGNC Symbol;Acc:HGNC:1625]	XCR1
ENSG00000183625	C-C motif chemokine receptor 3 [Source:HGNC Symbol;Acc:HGNC:1604]	CCR3
ENSG00000183542	killer cell lectin like receptor C4 [Source:HGNC Symbol;Acc:HGNC:6377]	KLRC4
ENSG00000205810	killer cell lectin like receptor C3 [Source:HGNC Symbol;Acc:HGNC:6376]	KLRC3
ENSG00000163823	C-C motif chemokine receptor 1 [Source:HGNC Symbol;Acc:HGNC:1602]	CCR1
ENSG00000121807	C-C motif chemokine receptor 2 [Source:HGNC Symbol;Acc:HGNC:1603]	CCR2
ENSG00000205809	killer cell lectin like receptor C2 [Source:HGNC Symbol;Acc:HGNC:6375]	KLRC2
ENSG00000160791	C-C motif chemokine receptor 5 [Source:HGNC Symbol;Acc:HGNC:1606]	CCR5
ENSG00000103522	interleukin 21 receptor [Source:HGNC Symbol;Acc:HGNC:6006]	IL21R
ENSG00000106683	LIM domain kinase 1 [Source:HGNC Symbol;Acc:HGNC:6613]	LIMK1
ENSG00000134545	killer cell lectin like receptor C1 [Source:HGNC Symbol;Acc:HGNC:6374]	KLRC1
ENSG00000070831	cell division cycle 42 [Source:HGNC Symbol;Acc:HGNC:1736]	CDC42
ENSG00000173372	complement C1q A chain [Source:HGNC Symbol;Acc:HGNC:1241]	C1QA
ENSG00000159189	complement C1q C chain [Source:HGNC Symbol;Acc:HGNC:1245]	C1QC
ENSG00000173369	complement C1q B chain [Source:HGNC Symbol;Acc:HGNC:1242]	C1QB
ENSG00000136950	actin related protein 2/3 complex subunit 5 like [Source:HGNC Symbol;Acc:HGNC:23366]	ARPC5L
ENSG00000044574	heat shock protein family A (Hsp70) member 5 [Source:HGNC Symbol;Acc:HGNC:5238]	HSPA5
ENSG00000185634	SHC adaptor protein 4 [Source:HGNC Symbol;Acc:HGNC:16743]	SHC4
ENSG00000074181	notch receptor 3 [Source:HGNC Symbol;Acc:HGNC:7883]	NOTCH3
ENSG00000197837	H4 histone 16 [Source:HGNC Symbol;Acc:HGNC:20510]	H4-16
ENSG00000101966	X-linked inhibitor of apoptosis [Source:HGNC Symbol;Acc:HGNC:592]	XIAP
ENSG00000246705	H2A.J histone [Source:HGNC Symbol;Acc:HGNC:14456]	H2AJ
ENSG00000171791	BCL2 apoptosis regulator [Source:HGNC Symbol;Acc:HGNC:990]	BCL2
ENSG00000158517	neutrophil cytosolic factor 1 [Source:HGNC Symbol;Acc:HGNC:7660]	NCF1
ENSG00000164220	coagulation factor II thrombin receptor like 2 [Source:HGNC Symbol;Acc:HGNC:3539]	F2RL2
ENSG00000181104	coagulation factor II thrombin receptor [Source:HGNC Symbol;Acc:HGNC:3537]	F2R
ENSG00000169429	C-X-C motif chemokine ligand 8 [Source:HGNC Symbol;Acc:HGNC:6025]	CXCL8
ENSG00000124875	C-X-C motif chemokine ligand 6 [Source:HGNC Symbol;Acc:HGNC:10643]	CXCL6
ENSG00000109272	platelet factor 4 variant 1 [Source:HGNC Symbol;Acc:HGNC:8862]	PF4V1
ENSG00000163739	C-X-C motif chemokine ligand 1 [Source:HGNC Symbol;Acc:HGNC:4602]	CXCL1
ENSG00000020633	RUNX family transcription factor 3 [Source:HGNC Symbol;Acc:HGNC:10473]	RUNX3
ENSG00000163737	platelet factor 4 [Source:HGNC Symbol;Acc:HGNC:8861]	PF4
ENSG00000163736	pro-platelet basic protein [Source:HGNC Symbol;Acc:HGNC:9240]	PPBP
ENSG00000163735	C-X-C motif chemokine ligand 5 [Source:HGNC Symbol;Acc:HGNC:10642]	CXCL5
ENSG00000163734	C-X-C motif chemokine ligand 3 [Source:HGNC Symbol;Acc:HGNC:4604]	CXCL3
ENSG00000081041	C-X-C motif chemokine ligand 2 [Source:HGNC Symbol;Acc:HGNC:4603]	CXCL2
ENSG00000197632	serpin family B member 2 [Source:HGNC Symbol;Acc:HGNC:8584]	SERPINB2
ENSG00000092439	transient receptor potential cation channel subfamily M member 7 [Source:HGNC Symbol;Acc:HGNC:17994]	TRPM7
ENSG00000187688	transient receptor potential cation channel subfamily V member 2 [Source:HGNC Symbol;Acc:HGNC:18082]	TRPV2
ENSG00000164047	cathelicidin antimicrobial peptide [Source:HGNC Symbol;Acc:HGNC:1472]	CAMP
ENSG00000183918	SH2 domain containing 1A [Source:HGNC Symbol;Acc:HGNC:10820]	SH2D1A
ENSG00000006606	C-C motif chemokine ligand 26 [Source:HGNC Symbol;Acc:HGNC:10625]	CCL26
ENSG00000106178	C-C motif chemokine ligand 24 [Source:HGNC Symbol;Acc:HGNC:10623]	CCL24
ENSG00000171453	RNA polymerase I and III subunit C [Source:HGNC Symbol;Acc:HGNC:20194]	POLR1C
ENSG00000180210	coagulation factor II, thrombin [Source:HGNC Symbol;Acc:HGNC:3535]	F2
ENSG00000240505	TNF receptor superfamily member 13B [Source:HGNC Symbol;Acc:HGNC:18153]	TNFRSF13B
ENSG00000213689	three prime repair exonuclease 1 [Source:HGNC Symbol;Acc:HGNC:12269]	TREX1
ENSG00000138755	C-X-C motif chemokine ligand 9 [Source:HGNC Symbol;Acc:HGNC:7098]	CXCL9
ENSG00000154589	lymphocyte antigen 96 [Source:HGNC Symbol;Acc:HGNC:17156]	LY96
ENSG00000169245	C-X-C motif chemokine ligand 10 [Source:HGNC Symbol;Acc:HGNC:10637]	CXCL10
ENSG00000169248	C-X-C motif chemokine ligand 11 [Source:HGNC Symbol;Acc:HGNC:10638]	CXCL11
ENSG00000069956	mitogen-activated protein kinase 6 [Source:HGNC Symbol;Acc:HGNC:6879]	MAPK6
ENSG00000069966	G protein subunit beta 5 [Source:HGNC Symbol;Acc:HGNC:4401]	GNB5
ENSG00000104432	interleukin 7 [Source:HGNC Symbol;Acc:HGNC:6023]	IL7
ENSG00000156234	C-X-C motif chemokine ligand 13 [Source:HGNC Symbol;Acc:HGNC:10639]	CXCL13
ENSG00000177455	CD19 molecule [Source:HGNC Symbol;Acc:HGNC:1633]	CD19
ENSG00000127533	F2R like thrombin or trypsin receptor 3 [Source:HGNC Symbol;Acc:HGNC:3540]	F2RL3
ENSG00000138071	actin related protein 2 [Source:HGNC Symbol;Acc:HGNC:169]	ACTR2
ENSG00000100644	hypoxia inducible factor 1 subunit alpha [Source:HGNC Symbol;Acc:HGNC:4910]	HIF1A
ENSG00000213658	linker for activation of T cells [Source:HGNC Symbol;Acc:HGNC:18874]	LAT
ENSG00000131196	nuclear factor of activated T cells 1 [Source:HGNC Symbol;Acc:HGNC:7775]	NFATC1
ENSG00000096384	heat shock protein 90 alpha family class B member 1 [Source:HGNC Symbol;Acc:HGNC:5258]	HSP90AB1
ENSG00000163297	ANTXR cell adhesion molecule 2 [Source:HGNC Symbol;Acc:HGNC:21732]	ANTXR2
ENSG00000148346	lipocalin 2 [Source:HGNC Symbol;Acc:HGNC:6526]	LCN2
ENSG00000146232	NFKB inhibitor epsilon [Source:HGNC Symbol;Acc:HGNC:7799]	NFKBIE
ENSG00000221823	protein phosphatase 3 regulatory subunit B, alpha [Source:HGNC Symbol;Acc:HGNC:9317]	PPP3R1
ENSG00000127955	G protein subunit alpha i1 [Source:HGNC Symbol;Acc:HGNC:4384]	GNAI1
ENSG00000138669	protein kinase cGMP-dependent 2 [Source:HGNC Symbol;Acc:HGNC:9416]	PRKG2
ENSG00000135218	CD36 molecule [Source:HGNC Symbol;Acc:HGNC:1663]	CD36
ENSG00000169604	ANTXR cell adhesion molecule 1 [Source:HGNC Symbol;Acc:HGNC:21014]	ANTXR1
ENSG00000133703	KRAS proto-oncogene, GTPase [Source:HGNC Symbol;Acc:HGNC:6407]	KRAS
ENSG00000123104	inositol 1,4,5-trisphosphate receptor type 2 [Source:HGNC Symbol;Acc:HGNC:6181]	ITPR2
ENSG00000148606	RNA polymerase III subunit A [Source:HGNC Symbol;Acc:HGNC:30074]	POLR3A
ENSG00000102245	CD40 ligand [Source:HGNC Symbol;Acc:HGNC:11935]	CD40LG
ENSG00000158195	WASP family member 2 [Source:HGNC Symbol;Acc:HGNC:12733]	WASF2
ENSG00000104312	receptor interacting serine/threonine kinase 2 [Source:HGNC Symbol;Acc:HGNC:10020]	RIPK2
ENSG00000112115	interleukin 17A [Source:HGNC Symbol;Acc:HGNC:5981]	IL17A
ENSG00000112116	interleukin 17F [Source:HGNC Symbol;Acc:HGNC:16404]	IL17F
ENSG00000000938	FGR proto-oncogene, Src family tyrosine kinase [Source:HGNC Symbol;Acc:HGNC:3697]	FGR
ENSG00000108179	peptidylprolyl isomerase F [Source:HGNC Symbol;Acc:HGNC:9259]	PPIF
ENSG00000101981	coagulation factor IX [Source:HGNC Symbol;Acc:HGNC:3551]	F9
ENSG00000126803	heat shock protein family A (Hsp70) member 2 [Source:HGNC Symbol;Acc:HGNC:5235]	HSPA2
ENSG00000105639	Janus kinase 3 [Source:HGNC Symbol;Acc:HGNC:6193]	JAK3
ENSG00000067560	ras homolog family member A [Source:HGNC Symbol;Acc:HGNC:667]	RHOA
ENSG00000103569	aquaporin 9 [Source:HGNC Symbol;Acc:HGNC:643]	AQP9
ENSG00000113356	RNA polymerase III subunit G [Source:HGNC Symbol;Acc:HGNC:30075]	POLR3G
ENSG00000166484	mitogen-activated protein kinase 7 [Source:HGNC Symbol;Acc:HGNC:6880]	MAPK7
ENSG00000102882	mitogen-activated protein kinase 3 [Source:HGNC Symbol;Acc:HGNC:6877]	MAPK3
ENSG00000096996	interleukin 12 receptor subunit beta 1 [Source:HGNC Symbol;Acc:HGNC:5971]	IL12RB1
ENSG00000105647	phosphoinositide-3-kinase regulatory subunit 2 [Source:HGNC Symbol;Acc:HGNC:8980]	PIK3R2
ENSG00000216490	IFI30 lysosomal thiol reductase [Source:HGNC Symbol;Acc:HGNC:5398]	IFI30
ENSG00000130522	JunD proto-oncogene, AP-1 transcription factor subunit [Source:HGNC Symbol;Acc:HGNC:6206]	JUND
ENSG00000149131	serpin family G member 1 [Source:HGNC Symbol;Acc:HGNC:1228]	SERPING1
ENSG00000180209	myosin light chain, phosphorylatable, fast skeletal muscle [Source:HGNC Symbol;Acc:HGNC:29824]	MYLPF
ENSG00000005844	integrin subunit alpha L [Source:HGNC Symbol;Acc:HGNC:6148]	ITGAL
ENSG00000198561	catenin delta 1 [Source:HGNC Symbol;Acc:HGNC:2515]	CTNND1
ENSG00000188375	H3.5 histone [Source:HGNC Symbol;Acc:HGNC:33164]	H3-5
ENSG00000109339	mitogen-activated protein kinase 10 [Source:HGNC Symbol;Acc:HGNC:6872]	MAPK10
ENSG00000102181	CD99 molecule like 2 [Source:HGNC Symbol;Acc:HGNC:18237]	CD99L2
ENSG00000072110	actinin alpha 1 [Source:HGNC Symbol;Acc:HGNC:163]	ACTN1
ENSG00000034152	mitogen-activated protein kinase kinase 3 [Source:HGNC Symbol;Acc:HGNC:6843]	MAP2K3
ENSG00000026103	Fas cell surface death receptor [Source:HGNC Symbol;Acc:HGNC:11920]	FAS
ENSG00000087470	dynamin 1 like [Source:HGNC Symbol;Acc:HGNC:2973]	DNM1L
ENSG00000141068	kinase suppressor of ras 1 [Source:HGNC Symbol;Acc:HGNC:6465]	KSR1
ENSG00000069667	RAR related orphan receptor A [Source:HGNC Symbol;Acc:HGNC:10258]	RORA
ENSG00000114353	G protein subunit alpha i2 [Source:HGNC Symbol;Acc:HGNC:4385]	GNAI2
ENSG00000103490	PYD and CARD domain containing [Source:HGNC Symbol;Acc:HGNC:16608]	PYCARD
ENSG00000169900	pyrin domain containing 1 [Source:HGNC Symbol;Acc:HGNC:30261]	PYDC1
ENSG00000169896	integrin subunit alpha M [Source:HGNC Symbol;Acc:HGNC:6149]	ITGAM
ENSG00000064490	regulatory factor X associated ankyrin containing protein [Source:HGNC Symbol;Acc:HGNC:9987]	RFXANK
ENSG00000140678	integrin subunit alpha X [Source:HGNC Symbol;Acc:HGNC:6152]	ITGAX
ENSG00000109072	vitronectin [Source:HGNC Symbol;Acc:HGNC:12724]	VTN
ENSG00000171914	talin 2 [Source:HGNC Symbol;Acc:HGNC:15447]	TLN2
ENSG00000147669	RNA polymerase II, I and III subunit K [Source:HGNC Symbol;Acc:HGNC:9198]	POLR2K
ENSG00000127928	G protein subunit gamma transducin 1 [Source:HGNC Symbol;Acc:HGNC:4411]	GNGT1
ENSG00000127920	G protein subunit gamma 11 [Source:HGNC Symbol;Acc:HGNC:4403]	GNG11
ENSG00000182866	LCK proto-oncogene, Src family tyrosine kinase [Source:HGNC Symbol;Acc:HGNC:6524]	LCK
ENSG00000164692	collagen type I alpha 2 chain [Source:HGNC Symbol;Acc:HGNC:2198]	COL1A2
ENSG00000116478	histone deacetylase 1 [Source:HGNC Symbol;Acc:HGNC:4852]	HDAC1
ENSG00000175130	MARCKS like 1 [Source:HGNC Symbol;Acc:HGNC:7142]	MARCKSL1
ENSG00000198001	interleukin 1 receptor associated kinase 4 [Source:HGNC Symbol;Acc:HGNC:17967]	IRAK4
ENSG00000140795	myosin light chain kinase 3 [Source:HGNC Symbol;Acc:HGNC:29826]	MYLK3
ENSG00000076604	TNF receptor associated factor 4 [Source:HGNC Symbol;Acc:HGNC:12034]	TRAF4
ENSG00000184216	interleukin 1 receptor associated kinase 1 [Source:HGNC Symbol;Acc:HGNC:6112]	IRAK1
ENSG00000149534	membrane spanning 4-domains A2 [Source:HGNC Symbol;Acc:HGNC:7316]	MS4A2
ENSG00000164430	cyclic GMP-AMP synthase [Source:HGNC Symbol;Acc:HGNC:21367]	CGAS
ENSG00000156738	membrane spanning 4-domains A1 [Source:HGNC Symbol;Acc:HGNC:7315]	MS4A1
ENSG00000095585	B cell linker [Source:HGNC Symbol;Acc:HGNC:14211]	BLNK
ENSG00000239732	toll like receptor 9 [Source:HGNC Symbol;Acc:HGNC:15633]	TLR9
ENSG00000107447	DNA nucleotidylexotransferase [Source:HGNC Symbol;Acc:HGNC:2983]	DNTT
ENSG00000110448	CD5 molecule [Source:HGNC Symbol;Acc:HGNC:1685]	CD5
ENSG00000155629	phosphoinositide-3-kinase adaptor protein 1 [Source:HGNC Symbol;Acc:HGNC:30034]	PIK3AP1
ENSG00000121281	adenylate cyclase 7 [Source:HGNC Symbol;Acc:HGNC:238]	ADCY7
ENSG00000079337	Rap guanine nucleotide exchange factor 3 [Source:HGNC Symbol;Acc:HGNC:16629]	RAPGEF3
ENSG00000243414	toll like receptor adaptor molecule 2 [Source:HGNC Symbol;Acc:HGNC:21354]	TICAM2
ENSG00000145782	autophagy related 12 [Source:HGNC Symbol;Acc:HGNC:588]	ATG12
ENSG00000167207	nucleotide binding oligomerization domain containing 2 [Source:HGNC Symbol;Acc:HGNC:5331]	NOD2
ENSG00000061273	histone deacetylase 7 [Source:HGNC Symbol;Acc:HGNC:14067]	HDAC7
ENSG00000083799	CYLD lysine 63 deubiquitinase [Source:HGNC Symbol;Acc:HGNC:2584]	CYLD
ENSG00000149476	triokinase and FMN cyclase [Source:HGNC Symbol;Acc:HGNC:24552]	TKFC
ENSG00000269335	inhibitor of nuclear factor kappa B kinase regulatory subunit gamma [Source:HGNC Symbol;Acc:HGNC:5961]	IKBKG
ENSG00000118785	secreted phosphoprotein 1 [Source:HGNC Symbol;Acc:HGNC:11255]	SPP1
ENSG00000066032	catenin alpha 2 [Source:HGNC Symbol;Acc:HGNC:2510]	CTNNA2
ENSG00000169032	mitogen-activated protein kinase kinase 1 [Source:HGNC Symbol;Acc:HGNC:6840]	MAP2K1
ENSG00000160293	vav guanine nucleotide exchange factor 2 [Source:HGNC Symbol;Acc:HGNC:12658]	VAV2
ENSG00000119535	colony stimulating factor 3 receptor [Source:HGNC Symbol;Acc:HGNC:2439]	CSF3R
ENSG00000170345	Fos proto-oncogene, AP-1 transcription factor subunit [Source:HGNC Symbol;Acc:HGNC:3796]	FOS
ENSG00000185010	coagulation factor VIII [Source:HGNC Symbol;Acc:HGNC:3546]	F8
ENSG00000274183	H2A.B variant histone 1 [Source:HGNC Symbol;Acc:HGNC:22516]	H2AB1
ENSG00000186350	retinoid X receptor alpha [Source:HGNC Symbol;Acc:HGNC:10477]	RXRA
ENSG00000185515	BRCA1/BRCA2-containing complex subunit 3 [Source:HGNC Symbol;Acc:HGNC:24185]	BRCC3
ENSG00000166949	SMAD family member 3 [Source:HGNC Symbol;Acc:HGNC:6769]	SMAD3
ENSG00000277858	H2A.B variant histone 2 [Source:HGNC Symbol;Acc:HGNC:18298]	H2AB2
ENSG00000277745	H2A.B variant histone 3 [Source:HGNC Symbol;Acc:HGNC:14455]	H2AB3
ENSG00000163932	protein kinase C delta [Source:HGNC Symbol;Acc:HGNC:9399]	PRKCD
ENSG00000124334	interleukin 9 receptor [Source:HGNC Symbol;Acc:HGNC:6030]	IL9R
ENSG00000087245	matrix metallopeptidase 2 [Source:HGNC Symbol;Acc:HGNC:7166]	MMP2
ENSG00000174233	adenylate cyclase 6 [Source:HGNC Symbol;Acc:HGNC:237]	ADCY6
ENSG00000213341	component of inhibitor of nuclear factor kappa B kinase complex [Source:HGNC Symbol;Acc:HGNC:1974]	CHUK
ENSG00000129007	calmodulin like 4 [Source:HGNC Symbol;Acc:HGNC:18445]	CALML4
ENSG00000241685	actin related protein 2/3 complex subunit 1A [Source:HGNC Symbol;Acc:HGNC:703]	ARPC1A
ENSG00000012124	CD22 molecule [Source:HGNC Symbol;Acc:HGNC:1643]	CD22
ENSG00000130429	actin related protein 2/3 complex subunit 1B [Source:HGNC Symbol;Acc:HGNC:704]	ARPC1B
ENSG00000118640	vesicle associated membrane protein 8 [Source:HGNC Symbol;Acc:HGNC:12647]	VAMP8
ENSG00000056736	interleukin 17 receptor B [Source:HGNC Symbol;Acc:HGNC:18015]	IL17RB
ENSG00000187796	caspase recruitment domain family member 9 [Source:HGNC Symbol;Acc:HGNC:16391]	CARD9
ENSG00000148400	notch receptor 1 [Source:HGNC Symbol;Acc:HGNC:7881]	NOTCH1
ENSG00000108691	C-C motif chemokine ligand 2 [Source:HGNC Symbol;Acc:HGNC:10618]	CCL2
ENSG00000108688	C-C motif chemokine ligand 7 [Source:HGNC Symbol;Acc:HGNC:10634]	CCL7
ENSG00000172156	C-C motif chemokine ligand 11 [Source:HGNC Symbol;Acc:HGNC:10610]	CCL11
ENSG00000162188	G protein subunit gamma 3 [Source:HGNC Symbol;Acc:HGNC:4405]	GNG3
ENSG00000108700	C-C motif chemokine ligand 8 [Source:HGNC Symbol;Acc:HGNC:10635]	CCL8
ENSG00000181374	C-C motif chemokine ligand 13 [Source:HGNC Symbol;Acc:HGNC:10611]	CCL13
ENSG00000108702	C-C motif chemokine ligand 1 [Source:HGNC Symbol;Acc:HGNC:10609]	CCL1
ENSG00000070190	dual adaptor of phosphotyrosine and 3-phosphoinositides 1 [Source:HGNC Symbol;Acc:HGNC:16500]	DAPP1
ENSG00000127191	TNF receptor associated factor 2 [Source:HGNC Symbol;Acc:HGNC:12032]	TRAF2
ENSG00000164032	H2A.Z variant histone 1 [Source:HGNC Symbol;Acc:HGNC:4741]	H2AZ1
ENSG00000176919	complement C8 gamma chain [Source:HGNC Symbol;Acc:HGNC:1354]	C8G
ENSG00000138814	protein phosphatase 3 catalytic subunit alpha [Source:HGNC Symbol;Acc:HGNC:9314]	PPP3CA
ENSG00000102962	C-C motif chemokine ligand 22 [Source:HGNC Symbol;Acc:HGNC:10621]	CCL22
ENSG00000006210	C-X3-C motif chemokine ligand 1 [Source:HGNC Symbol;Acc:HGNC:10647]	CX3CL1
ENSG00000102970	C-C motif chemokine ligand 17 [Source:HGNC Symbol;Acc:HGNC:10615]	CCL17
ENSG00000153563	CD8a molecule [Source:HGNC Symbol;Acc:HGNC:1706]	CD8A
ENSG00000066136	nuclear transcription factor Y subunit gamma [Source:HGNC Symbol;Acc:HGNC:7806]	NFYC
ENSG00000172116	CD8b molecule [Source:HGNC Symbol;Acc:HGNC:1707]	CD8B
ENSG00000109320	nuclear factor kappa B subunit 1 [Source:HGNC Symbol;Acc:HGNC:7794]	NFKB1
ENSG00000164399	interleukin 3 [Source:HGNC Symbol;Acc:HGNC:6011]	IL3
ENSG00000164400	colony stimulating factor 2 [Source:HGNC Symbol;Acc:HGNC:2434]	CSF2
ENSG00000198668	calmodulin 1 [Source:HGNC Symbol;Acc:HGNC:1442]	CALM1
ENSG00000077150	nuclear factor kappa B subunit 2 [Source:HGNC Symbol;Acc:HGNC:7795]	NFKB2
ENSG00000125347	interferon regulatory factor 1 [Source:HGNC Symbol;Acc:HGNC:6116]	IRF1
ENSG00000113525	interleukin 5 [Source:HGNC Symbol;Acc:HGNC:6016]	IL5
ENSG00000126264	hematopoietic cell signal transducer [Source:HGNC Symbol;Acc:HGNC:16977]	HCST
ENSG00000011600	transmembrane immune signaling adaptor TYROBP [Source:HGNC Symbol;Acc:HGNC:12449]	TYROBP
ENSG00000169194	interleukin 13 [Source:HGNC Symbol;Acc:HGNC:5973]	IL13
ENSG00000113520	interleukin 4 [Source:HGNC Symbol;Acc:HGNC:6014]	IL4
ENSG00000135341	mitogen-activated protein kinase kinase kinase 7 [Source:HGNC Symbol;Acc:HGNC:6859]	MAP3K7
ENSG00000149781	fermitin family member 3 [Source:HGNC Symbol;Acc:HGNC:23151]	FERMT3
ENSG00000276085	C-C motif chemokine ligand 3 like 3 [Source:HGNC Symbol;Acc:HGNC:30554]	CCL3L3
ENSG00000164007	claudin 19 [Source:HGNC Symbol;Acc:HGNC:2040]	CLDN19
ENSG00000172354	G protein subunit beta 2 [Source:HGNC Symbol;Acc:HGNC:4398]	GNB2
ENSG00000153317	ArfGAP with SH3 domain, ankyrin repeat and PH domain 1 [Source:HGNC Symbol;Acc:HGNC:2720]	ASAP1
ENSG00000149782	phospholipase C beta 3 [Source:HGNC Symbol;Acc:HGNC:9056]	PLCB3
ENSG00000130427	erythropoietin [Source:HGNC Symbol;Acc:HGNC:3415]	EPO
ENSG00000155897	adenylate cyclase 8 [Source:HGNC Symbol;Acc:HGNC:239]	ADCY8
ENSG00000170606	heat shock protein family A (Hsp70) member 4 [Source:HGNC Symbol;Acc:HGNC:5237]	HSPA4
ENSG00000002330	BCL2 associated agonist of cell death [Source:HGNC Symbol;Acc:HGNC:936]	BAD
ENSG00000213585	voltage dependent anion channel 1 [Source:HGNC Symbol;Acc:HGNC:12669]	VDAC1
ENSG00000087077	thyroid hormone receptor interactor 6 [Source:HGNC Symbol;Acc:HGNC:12311]	TRIP6
ENSG00000068831	RAS guanyl releasing protein 2 [Source:HGNC Symbol;Acc:HGNC:9879]	RASGRP2
ENSG00000106366	serpin family E member 1 [Source:HGNC Symbol;Acc:HGNC:8583]	SERPINE1
ENSG00000113648	macroH2A.1 histone [Source:HGNC Symbol;Acc:HGNC:4740]	MACROH2A1
ENSG00000106404	claudin 15 [Source:HGNC Symbol;Acc:HGNC:2036]	CLDN15
ENSG00000145824	C-X-C motif chemokine ligand 14 [Source:HGNC Symbol;Acc:HGNC:10640]	CXCL14
ENSG00000057663	autophagy related 5 [Source:HGNC Symbol;Acc:HGNC:589]	ATG5
ENSG00000106436	myosin light chain 10 [Source:HGNC Symbol;Acc:HGNC:29825]	MYL10
ENSG00000272398	CD24 molecule [Source:HGNC Symbol;Acc:HGNC:1645]	CD24
ENSG00000115085	zeta chain of T cell receptor associated protein kinase 70 [Source:HGNC Symbol;Acc:HGNC:12858]	ZAP70
ENSG00000179776	cadherin 5 [Source:HGNC Symbol;Acc:HGNC:1764]	CDH5
ENSG00000118689	forkhead box O3 [Source:HGNC Symbol;Acc:HGNC:3821]	FOXO3
ENSG00000205403	complement factor I [Source:HGNC Symbol;Acc:HGNC:5394]	CFI
ENSG00000169398	protein tyrosine kinase 2 [Source:HGNC Symbol;Acc:HGNC:9611]	PTK2
ENSG00000139626	integrin subunit beta 7 [Source:HGNC Symbol;Acc:HGNC:6162]	ITGB7
ENSG00000112290	WASP family member 1 [Source:HGNC Symbol;Acc:HGNC:12732]	WASF1
ENSG00000044115	catenin alpha 1 [Source:HGNC Symbol;Acc:HGNC:2509]	CTNNA1
ENSG00000100600	legumain [Source:HGNC Symbol;Acc:HGNC:9472]	LGMN
ENSG00000130669	p21 (RAC1) activated kinase 4 [Source:HGNC Symbol;Acc:HGNC:16059]	PAK4
ENSG00000056972	TRAF3 interacting protein 2 [Source:HGNC Symbol;Acc:HGNC:1343]	TRAF3IP2
ENSG00000102871	TNFRSF1A associated via death domain [Source:HGNC Symbol;Acc:HGNC:12030]	TRADD
ENSG00000010810	FYN proto-oncogene, Src family tyrosine kinase [Source:HGNC Symbol;Acc:HGNC:4037]	FYN
ENSG00000108342	colony stimulating factor 3 [Source:HGNC Symbol;Acc:HGNC:2438]	CSF3
ENSG00000213445	signal-induced proliferation-associated 1 [Source:HGNC Symbol;Acc:HGNC:10885]	SIPA1
ENSG00000173039	RELA proto-oncogene, NF-kB subunit [Source:HGNC Symbol;Acc:HGNC:9955]	RELA
ENSG00000115590	interleukin 1 receptor type 2 [Source:HGNC Symbol;Acc:HGNC:5994]	IL1R2
ENSG00000115594	interleukin 1 receptor type 1 [Source:HGNC Symbol;Acc:HGNC:5993]	IL1R1
ENSG00000173846	polo like kinase 3 [Source:HGNC Symbol;Acc:HGNC:2154]	PLK3
ENSG00000090932	delta like canonical Notch ligand 3 [Source:HGNC Symbol;Acc:HGNC:2909]	DLL3
ENSG00000184500	protein S [Source:HGNC Symbol;Acc:HGNC:9456]	PROS1
ENSG00000198873	G protein-coupled receptor kinase 5 [Source:HGNC Symbol;Acc:HGNC:4544]	GRK5
ENSG00000277443	myristoylated alanine rich protein kinase C substrate [Source:HGNC Symbol;Acc:HGNC:6759]	MARCKS
ENSG00000188488	serpin family A member 5 [Source:HGNC Symbol;Acc:HGNC:8723]	SERPINA5
ENSG00000196591	histone deacetylase 2 [Source:HGNC Symbol;Acc:HGNC:4853]	HDAC2
ENSG00000172757	cofilin 1 [Source:HGNC Symbol;Acc:HGNC:1874]	CFL1
ENSG00000131759	retinoic acid receptor alpha [Source:HGNC Symbol;Acc:HGNC:9864]	RARA
ENSG00000105221	AKT serine/threonine kinase 2 [Source:HGNC Symbol;Acc:HGNC:392]	AKT2
ENSG00000105835	nicotinamide phosphoribosyltransferase [Source:HGNC Symbol;Acc:HGNC:30092]	NAMPT
ENSG00000126353	C-C motif chemokine receptor 7 [Source:HGNC Symbol;Acc:HGNC:1608]	CCR7
ENSG00000161638	integrin subunit alpha 5 [Source:HGNC Symbol;Acc:HGNC:6141]	ITGA5
ENSG00000173612	G protein-coupled receptor class C group 6 member A [Source:HGNC Symbol;Acc:HGNC:18510]	GPRC6A
ENSG00000105851	phosphatidylinositol-4,5-bisphosphate 3-kinase catalytic subunit gamma [Source:HGNC Symbol;Acc:HGNC:8978]	PIK3CG
ENSG00000175592	FOS like 1, AP-1 transcription factor subunit [Source:HGNC Symbol;Acc:HGNC:13718]	FOSL1
ENSG00000071051	NCK adaptor protein 2 [Source:HGNC Symbol;Acc:HGNC:7665]	NCK2
ENSG00000254126	CD8b2 molecule [Source:HGNC Symbol;Acc:HGNC:1708]	CD8B2
ENSG00000168398	bradykinin receptor B2 [Source:HGNC Symbol;Acc:HGNC:1030]	BDKRB2
ENSG00000170458	CD14 molecule [Source:HGNC Symbol;Acc:HGNC:1628]	CD14
ENSG00000100739	bradykinin receptor B1 [Source:HGNC Symbol;Acc:HGNC:1029]	BDKRB1
ENSG00000140368	proline-serine-threonine phosphatase interacting protein 1 [Source:HGNC Symbol;Acc:HGNC:9580]	PSTPIP1
ENSG00000117461	phosphoinositide-3-kinase regulatory subunit 3 [Source:HGNC Symbol;Acc:HGNC:8981]	PIK3R3
ENSG00000072736	nuclear factor of activated T cells 3 [Source:HGNC Symbol;Acc:HGNC:7777]	NFATC3
ENSG00000179526	SHANK associated RH domain interactor [Source:HGNC Symbol;Acc:HGNC:25321]	SHARPIN
ENSG00000171720	histone deacetylase 3 [Source:HGNC Symbol;Acc:HGNC:4854]	HDAC3
ENSG00000105329	transforming growth factor beta 1 [Source:HGNC Symbol;Acc:HGNC:11766]	TGFB1
ENSG00000108771	DExH-box helicase 58 [Source:HGNC Symbol;Acc:HGNC:29517]	DHX58
ENSG00000114423	Cbl proto-oncogene B [Source:HGNC Symbol;Acc:HGNC:1542]	CBLB
ENSG00000105369	CD79a molecule [Source:HGNC Symbol;Acc:HGNC:1698]	CD79A
ENSG00000076928	Rho guanine nucleotide exchange factor 1 [Source:HGNC Symbol;Acc:HGNC:681]	ARHGEF1
ENSG00000173757	signal transducer and activator of transcription 5B [Source:HGNC Symbol;Acc:HGNC:11367]	STAT5B
ENSG00000126561	signal transducer and activator of transcription 5A [Source:HGNC Symbol;Acc:HGNC:11366]	STAT5A
ENSG00000173020	G protein-coupled receptor kinase 2 [Source:HGNC Symbol;Acc:HGNC:289]	GRK2
ENSG00000168610	signal transducer and activator of transcription 3 [Source:HGNC Symbol;Acc:HGNC:11364]	STAT3
ENSG00000172531	protein phosphatase 1 catalytic subunit alpha [Source:HGNC Symbol;Acc:HGNC:9281]	PPP1CA
ENSG00000080824	heat shock protein 90 alpha family class A member 1 [Source:HGNC Symbol;Acc:HGNC:5253]	HSP90AA1
ENSG00000175634	ribosomal protein S6 kinase B2 [Source:HGNC Symbol;Acc:HGNC:10437]	RPS6KB2
ENSG00000115008	interleukin 1 alpha [Source:HGNC Symbol;Acc:HGNC:5991]	IL1A
ENSG00000125538	interleukin 1 beta [Source:HGNC Symbol;Acc:HGNC:5992]	IL1B
ENSG00000105723	glycogen synthase kinase 3 alpha [Source:HGNC Symbol;Acc:HGNC:4616]	GSK3A
ENSG00000110944	interleukin 23 subunit alpha [Source:HGNC Symbol;Acc:HGNC:15488]	IL23A
ENSG00000170581	signal transducer and activator of transcription 2 [Source:HGNC Symbol;Acc:HGNC:11363]	STAT2
ENSG00000131323	TNF receptor associated factor 3 [Source:HGNC Symbol;Acc:HGNC:12033]	TRAF3
ENSG00000150760	dedicator of cytokinesis 1 [Source:HGNC Symbol;Acc:HGNC:2987]	DOCK1
ENSG00000115091	actin related protein 3 [Source:HGNC Symbol;Acc:HGNC:170]	ACTR3
ENSG00000184451	C-C motif chemokine receptor 10 [Source:HGNC Symbol;Acc:HGNC:4474]	CCR10
ENSG00000131467	proteasome activator subunit 3 [Source:HGNC Symbol;Acc:HGNC:9570]	PSME3
ENSG00000011422	plasminogen activator, urokinase receptor [Source:HGNC Symbol;Acc:HGNC:9053]	PLAUR
ENSG00000166888	signal transducer and activator of transcription 6 [Source:HGNC Symbol;Acc:HGNC:11368]	STAT6
ENSG00000127743	interleukin 17B [Source:HGNC Symbol;Acc:HGNC:5982]	IL17B
ENSG00000168040	Fas associated via death domain [Source:HGNC Symbol;Acc:HGNC:3573]	FADD
ENSG00000069399	BCL3 transcription coactivator [Source:HGNC Symbol;Acc:HGNC:998]	BCL3
ENSG00000182578	colony stimulating factor 1 receptor [Source:HGNC Symbol;Acc:HGNC:2433]	CSF1R
ENSG00000142208	AKT serine/threonine kinase 1 [Source:HGNC Symbol;Acc:HGNC:391]	AKT1
ENSG00000136717	bridging integrator 1 [Source:HGNC Symbol;Acc:HGNC:1052]	BIN1
ENSG00000104856	RELB proto-oncogene, NF-kB subunit [Source:HGNC Symbol;Acc:HGNC:9956]	RELB
ENSG00000109471	interleukin 2 [Source:HGNC Symbol;Acc:HGNC:6001]	IL2
ENSG00000184916	jagged canonical Notch ligand 2 [Source:HGNC Symbol;Acc:HGNC:6189]	JAG2
ENSG00000138684	interleukin 21 [Source:HGNC Symbol;Acc:HGNC:6005]	IL21
ENSG00000121594	CD80 molecule [Source:HGNC Symbol;Acc:HGNC:1700]	CD80
ENSG00000019582	CD74 molecule [Source:HGNC Symbol;Acc:HGNC:1697]	CD74
ENSG00000151475	solute carrier family 25 member 31 [Source:HGNC Symbol;Acc:HGNC:25319]	SLC25A31
ENSG00000082701	glycogen synthase kinase 3 beta [Source:HGNC Symbol;Acc:HGNC:4617]	GSK3B
ENSG00000162407	phospholipid phosphatase 3 [Source:HGNC Symbol;Acc:HGNC:9229]	PLPP3
ENSG00000125740	FosB proto-oncogene, AP-1 transcription factor subunit [Source:HGNC Symbol;Acc:HGNC:3797]	FOSB
ENSG00000157131	complement C8 alpha chain [Source:HGNC Symbol;Acc:HGNC:1352]	C8A
ENSG00000021852	complement C8 beta chain [Source:HGNC Symbol;Acc:HGNC:1353]	C8B
ENSG00000115718	protein C, inactivator of coagulation factors Va and VIIIa [Source:HGNC Symbol;Acc:HGNC:9451]	PROC
ENSG00000125753	vasodilator stimulated phosphoprotein [Source:HGNC Symbol;Acc:HGNC:12652]	VASP
ENSG00000108840	histone deacetylase 5 [Source:HGNC Symbol;Acc:HGNC:14068]	HDAC5
ENSG00000177606	Jun proto-oncogene, AP-1 transcription factor subunit [Source:HGNC Symbol;Acc:HGNC:6204]	JUN
ENSG00000135446	cyclin dependent kinase 4 [Source:HGNC Symbol;Acc:HGNC:1773]	CDK4
ENSG00000114013	CD86 molecule [Source:HGNC Symbol;Acc:HGNC:1705]	CD86
ENSG00000036828	calcium sensing receptor [Source:HGNC Symbol;Acc:HGNC:1514]	CASR
ENSG00000165458	inositol polyphosphate phosphatase like 1 [Source:HGNC Symbol;Acc:HGNC:6080]	INPPL1
ENSG00000005961	integrin subunit alpha 2b [Source:HGNC Symbol;Acc:HGNC:6138]	ITGA2B
ENSG00000160014	calmodulin 3 [Source:HGNC Symbol;Acc:HGNC:1449]	CALM3
ENSG00000034713	GABA type A receptor associated protein like 2 [Source:HGNC Symbol;Acc:HGNC:13291]	GABARAPL2
ENSG00000160013	prostaglandin I2 receptor [Source:HGNC Symbol;Acc:HGNC:9602]	PTGIR
ENSG00000167414	G protein subunit gamma 8 [Source:HGNC Symbol;Acc:HGNC:19664]	GNG8
ENSG00000173175	adenylate cyclase 5 [Source:HGNC Symbol;Acc:HGNC:236]	ADCY5
ENSG00000065534	myosin light chain kinase [Source:HGNC Symbol;Acc:HGNC:7590]	MYLK
ENSG00000196782	mastermind like transcriptional coactivator 3 [Source:HGNC Symbol;Acc:HGNC:16272]	MAML3
ENSG00000128604	interferon regulatory factor 5 [Source:HGNC Symbol;Acc:HGNC:6120]	IRF5
ENSG00000164136	interleukin 15 [Source:HGNC Symbol;Acc:HGNC:5977]	IL15
ENSG00000160007	Rho GTPase activating protein 35 [Source:HGNC Symbol;Acc:HGNC:4591]	ARHGAP35
ENSG00000178573	MAF bZIP transcription factor [Source:HGNC Symbol;Acc:HGNC:6776]	MAF
ENSG00000183735	TANK binding kinase 1 [Source:HGNC Symbol;Acc:HGNC:11584]	TBK1
ENSG00000197405	complement C5a receptor 1 [Source:HGNC Symbol;Acc:HGNC:1338]	C5AR1
ENSG00000162434	Janus kinase 1 [Source:HGNC Symbol;Acc:HGNC:6190]	JAK1
ENSG00000113263	IL2 inducible T cell kinase [Source:HGNC Symbol;Acc:HGNC:6171]	ITK
ENSG00000166825	alanyl aminopeptidase, membrane [Source:HGNC Symbol;Acc:HGNC:500]	ANPEP
ENSG00000170180	glycophorin A (MNS blood group) [Source:HGNC Symbol;Acc:HGNC:4702]	GYPA
ENSG00000197943	phospholipase C gamma 2 [Source:HGNC Symbol;Acc:HGNC:9066]	PLCG2
ENSG00000105499	phospholipase A2 group IVC [Source:HGNC Symbol;Acc:HGNC:9037]	PLA2G4C
ENSG00000105483	caspase recruitment domain family member 8 [Source:HGNC Symbol;Acc:HGNC:17057]	CARD8
ENSG00000162594	interleukin 23 receptor [Source:HGNC Symbol;Acc:HGNC:19100]	IL23R
ENSG00000111537	interferon gamma [Source:HGNC Symbol;Acc:HGNC:5438]	IFNG
ENSG00000081985	interleukin 12 receptor subunit beta 2 [Source:HGNC Symbol;Acc:HGNC:5972]	IL12RB2
ENSG00000113302	interleukin 12B [Source:HGNC Symbol;Acc:HGNC:5970]	IL12B
ENSG00000127318	interleukin 22 [Source:HGNC Symbol;Acc:HGNC:14900]	IL22
ENSG00000127314	RAP1B, member of RAS oncogene family [Source:HGNC Symbol;Acc:HGNC:9857]	RAP1B
ENSG00000172380	G protein subunit gamma 12 [Source:HGNC Symbol;Acc:HGNC:19663]	GNG12
ENSG00000027697	interferon gamma receptor 1 [Source:HGNC Symbol;Acc:HGNC:5439]	IFNGR1
ENSG00000118503	TNF alpha induced protein 3 [Source:HGNC Symbol;Acc:HGNC:11896]	TNFAIP3
ENSG00000121966	C-X-C motif chemokine receptor 4 [Source:HGNC Symbol;Acc:HGNC:2561]	CXCR4
ENSG00000063176	sphingosine kinase 2 [Source:HGNC Symbol;Acc:HGNC:18859]	SPHK2
ENSG00000259207	integrin subunit beta 3 [Source:HGNC Symbol;Acc:HGNC:6156]	ITGB3
ENSG00000135679	MDM2 proto-oncogene [Source:HGNC Symbol;Acc:HGNC:6973]	MDM2
ENSG00000169704	glycoprotein IX platelet [Source:HGNC Symbol;Acc:HGNC:4444]	GP9
ENSG00000137486	arrestin beta 1 [Source:HGNC Symbol;Acc:HGNC:711]	ARRB1
ENSG00000198933	TBK1 binding protein 1 [Source:HGNC Symbol;Acc:HGNC:30140]	TBKBP1
ENSG00000073861	T-box transcription factor 21 [Source:HGNC Symbol;Acc:HGNC:11599]	TBX21
ENSG00000104894	CD37 molecule [Source:HGNC Symbol;Acc:HGNC:1666]	CD37
ENSG00000134516	dedicator of cytokinesis 2 [Source:HGNC Symbol;Acc:HGNC:2988]	DOCK2
ENSG00000124391	interleukin 17C [Source:HGNC Symbol;Acc:HGNC:5983]	IL17C
ENSG00000051523	cytochrome b-245 alpha chain [Source:HGNC Symbol;Acc:HGNC:2577]	CYBA
ENSG00000137462	toll like receptor 2 [Source:HGNC Symbol;Acc:HGNC:11848]	TLR2
ENSG00000043462	lymphocyte cytosolic protein 2 [Source:HGNC Symbol;Acc:HGNC:6529]	LCP2
ENSG00000090554	fms related receptor tyrosine kinase 3 ligand [Source:HGNC Symbol;Acc:HGNC:3766]	FLT3LG
ENSG00000171564	fibrinogen beta chain [Source:HGNC Symbol;Acc:HGNC:3662]	FGB
ENSG00000171560	fibrinogen alpha chain [Source:HGNC Symbol;Acc:HGNC:3661]	FGA
ENSG00000171557	fibrinogen gamma chain [Source:HGNC Symbol;Acc:HGNC:3694]	FGG
ENSG00000164116	guanylate cyclase 1 soluble subunit alpha 1 [Source:HGNC Symbol;Acc:HGNC:4685]	GUCY1A1
ENSG00000126458	RAS related [Source:HGNC Symbol;Acc:HGNC:10447]	RRAS
ENSG00000055208	TGF-beta activated kinase 1 (MAP3K7) binding protein 2 [Source:HGNC Symbol;Acc:HGNC:17075]	TAB2
ENSG00000126456	interferon regulatory factor 3 [Source:HGNC Symbol;Acc:HGNC:6118]	IRF3
ENSG00000167083	G protein subunit gamma transducin 2 [Source:HGNC Symbol;Acc:HGNC:4412]	GNGT2
ENSG00000061918	guanylate cyclase 1 soluble subunit beta 1 [Source:HGNC Symbol;Acc:HGNC:4687]	GUCY1B1
ENSG00000149269	p21 (RAC1) activated kinase 1 [Source:HGNC Symbol;Acc:HGNC:8590]	PAK1
ENSG00000164520	retinoic acid early transcript 1E [Source:HGNC Symbol;Acc:HGNC:16793]	RAET1E
ENSG00000059377	thromboxane A synthase 1 [Source:HGNC Symbol;Acc:HGNC:11609]	TBXAS1
ENSG00000203722	retinoic acid early transcript 1G [Source:HGNC Symbol;Acc:HGNC:16795]	RAET1G
ENSG00000131015	UL16 binding protein 2 [Source:HGNC Symbol;Acc:HGNC:14894]	ULBP2
ENSG00000111981	UL16 binding protein 1 [Source:HGNC Symbol;Acc:HGNC:14893]	ULBP1
ENSG00000155918	retinoic acid early transcript 1L [Source:HGNC Symbol;Acc:HGNC:16798]	RAET1L
ENSG00000131019	UL16 binding protein 3 [Source:HGNC Symbol;Acc:HGNC:14895]	ULBP3
ENSG00000142875	protein kinase cAMP-activated catalytic subunit beta [Source:HGNC Symbol;Acc:HGNC:9381]	PRKACB
ENSG00000033327	GRB2 associated binding protein 2 [Source:HGNC Symbol;Acc:HGNC:14458]	GAB2
ENSG00000005884	integrin subunit alpha 3 [Source:HGNC Symbol;Acc:HGNC:6139]	ITGA3
ENSG00000174021	G protein subunit gamma 5 [Source:HGNC Symbol;Acc:HGNC:4408]	GNG5
ENSG00000157764	B-Raf proto-oncogene, serine/threonine kinase [Source:HGNC Symbol;Acc:HGNC:1097]	BRAF
ENSG00000108821	collagen type I alpha 1 chain [Source:HGNC Symbol;Acc:HGNC:2197]	COL1A1
ENSG00000142867	BCL10 immune signaling adaptor [Source:HGNC Symbol;Acc:HGNC:989]	BCL10
ENSG00000065243	protein kinase N2 [Source:HGNC Symbol;Acc:HGNC:9406]	PKN2
ENSG00000117226	guanylate binding protein 3 [Source:HGNC Symbol;Acc:HGNC:4184]	GBP3
ENSG00000117228	guanylate binding protein 1 [Source:HGNC Symbol;Acc:HGNC:4182]	GBP1
ENSG00000162645	guanylate binding protein 2 [Source:HGNC Symbol;Acc:HGNC:4183]	GBP2
ENSG00000213512	guanylate binding protein 7 [Source:HGNC Symbol;Acc:HGNC:29606]	GBP7
ENSG00000162654	guanylate binding protein 4 [Source:HGNC Symbol;Acc:HGNC:20480]	GBP4
ENSG00000154451	guanylate binding protein 5 [Source:HGNC Symbol;Acc:HGNC:19895]	GBP5
ENSG00000058272	protein phosphatase 1 regulatory subunit 12A [Source:HGNC Symbol;Acc:HGNC:7618]	PPP1R12A
ENSG00000131187	coagulation factor XII [Source:HGNC Symbol;Acc:HGNC:3530]	F12
ENSG00000198055	G protein-coupled receptor kinase 6 [Source:HGNC Symbol;Acc:HGNC:4545]	GRK6
ENSG00000109572	chloride voltage-gated channel 3 [Source:HGNC Symbol;Acc:HGNC:2021]	CLCN3
ENSG00000171217	claudin 20 [Source:HGNC Symbol;Acc:HGNC:2042]	CLDN20
ENSG00000136560	TRAF family member associated NFKB activator [Source:HGNC Symbol;Acc:HGNC:11562]	TANK
ENSG00000158092	NCK adaptor protein 1 [Source:HGNC Symbol;Acc:HGNC:7664]	NCK1
ENSG00000129450	sialic acid binding Ig like lectin 9 [Source:HGNC Symbol;Acc:HGNC:10878]	SIGLEC9
ENSG00000092820	ezrin [Source:HGNC Symbol;Acc:HGNC:12691]	EZR
ENSG00000066405	claudin 18 [Source:HGNC Symbol;Acc:HGNC:2039]	CLDN18
ENSG00000105383	CD33 molecule [Source:HGNC Symbol;Acc:HGNC:1659]	CD33
ENSG00000115267	interferon induced with helicase C domain 1 [Source:HGNC Symbol;Acc:HGNC:18873]	IFIH1
ENSG00000117525	coagulation factor III, tissue factor [Source:HGNC Symbol;Acc:HGNC:3541]	F3
ENSG00000158186	muscle RAS oncogene homolog [Source:HGNC Symbol;Acc:HGNC:7227]	MRAS
ENSG00000122194	plasminogen [Source:HGNC Symbol;Acc:HGNC:9071]	PLG
ENSG00000171051	formyl peptide receptor 1 [Source:HGNC Symbol;Acc:HGNC:3826]	FPR1
ENSG00000171049	formyl peptide receptor 2 [Source:HGNC Symbol;Acc:HGNC:3827]	FPR2
ENSG00000187474	formyl peptide receptor 3 [Source:HGNC Symbol;Acc:HGNC:3828]	FPR3
ENSG00000049130	KIT ligand [Source:HGNC Symbol;Acc:HGNC:6343]	KITLG
ENSG00000177300	claudin 22 [Source:HGNC Symbol;Acc:HGNC:2044]	CLDN22
ENSG00000185758	claudin 24 [Source:HGNC Symbol;Acc:HGNC:37200]	CLDN24
ENSG00000106526	actin related protein 3C [Source:HGNC Symbol;Acc:HGNC:37282]	ACTR3C
ENSG00000051382	phosphatidylinositol-4,5-bisphosphate 3-kinase catalytic subunit beta [Source:HGNC Symbol;Acc:HGNC:8976]	PIK3CB
ENSG00000164305	caspase 3 [Source:HGNC Symbol;Acc:HGNC:1504]	CASP3
ENSG00000164867	nitric oxide synthase 3 [Source:HGNC Symbol;Acc:HGNC:7876]	NOS3
ENSG00000110218	pannexin 1 [Source:HGNC Symbol;Acc:HGNC:8599]	PANX1
ENSG00000151729	solute carrier family 25 member 4 [Source:HGNC Symbol;Acc:HGNC:10990]	SLC25A4
ENSG00000162692	vascular cell adhesion molecule 1 [Source:HGNC Symbol;Acc:HGNC:12663]	VCAM1
ENSG00000112486	C-C motif chemokine receptor 6 [Source:HGNC Symbol;Acc:HGNC:1607]	CCR6
ENSG00000114124	G protein-coupled receptor kinase 7 [Source:HGNC Symbol;Acc:HGNC:17031]	GRK7
ENSG00000130396	afadin, adherens junction formation factor [Source:HGNC Symbol;Acc:HGNC:7137]	AFDN
ENSG00000142405	NLR family pyrin domain containing 12 [Source:HGNC Symbol;Acc:HGNC:22938]	NLRP12
ENSG00000126583	protein kinase C gamma [Source:HGNC Symbol;Acc:HGNC:9402]	PRKCG
ENSG00000050748	mitogen-activated protein kinase 9 [Source:HGNC Symbol;Acc:HGNC:6886]	MAPK9
ENSG00000184384	mastermind like transcriptional coactivator 2 [Source:HGNC Symbol;Acc:HGNC:16259]	MAML2
ENSG00000164342	toll like receptor 3 [Source:HGNC Symbol;Acc:HGNC:11849]	TLR3
ENSG00000285480	H2B.E variant histone 1 [Source:HGNC Symbol;Acc:HGNC:53833]	H2BE1
ENSG00000164344	kallikrein B1 [Source:HGNC Symbol;Acc:HGNC:6371]	KLKB1
ENSG00000088926	coagulation factor XI [Source:HGNC Symbol;Acc:HGNC:3529]	F11
ENSG00000134215	vav guanine nucleotide exchange factor 3 [Source:HGNC Symbol;Acc:HGNC:12659]	VAV3
ENSG00000023445	baculoviral IAP repeat containing 3 [Source:HGNC Symbol;Acc:HGNC:591]	BIRC3
ENSG00000110330	baculoviral IAP repeat containing 2 [Source:HGNC Symbol;Acc:HGNC:590]	BIRC2
ENSG00000196611	matrix metallopeptidase 1 [Source:HGNC Symbol;Acc:HGNC:7155]	MMP1
ENSG00000149968	matrix metallopeptidase 3 [Source:HGNC Symbol;Acc:HGNC:7173]	MMP3
ENSG00000137745	matrix metallopeptidase 13 [Source:HGNC Symbol;Acc:HGNC:7159]	MMP13
ENSG00000133627	actin related protein 3B [Source:HGNC Symbol;Acc:HGNC:17256]	ACTR3B
ENSG00000204403	caspase 12 (gene/pseudogene) [Source:HGNC Symbol;Acc:HGNC:19004]	CASP12
ENSG00000196954	caspase 4 [Source:HGNC Symbol;Acc:HGNC:1505]	CASP4
ENSG00000137757	caspase 5 [Source:HGNC Symbol;Acc:HGNC:1506]	CASP5
ENSG00000137752	caspase 1 [Source:HGNC Symbol;Acc:HGNC:1499]	CASP1
ENSG00000204397	caspase recruitment domain family member 16 [Source:HGNC Symbol;Acc:HGNC:33701]	CARD16
ENSG00000255221	caspase recruitment domain family member 17 [Source:HGNC Symbol;Acc:HGNC:33827]	CARD17
ENSG00000065135	G protein subunit alpha i3 [Source:HGNC Symbol;Acc:HGNC:4387]	GNAI3
ENSG00000255501	caspase recruitment domain family member 18 [Source:HGNC Symbol;Acc:HGNC:28861]	CARD18
ENSG00000128708	histone acetyltransferase 1 [Source:HGNC Symbol;Acc:HGNC:4821]	HAT1
ENSG00000152402	guanylate cyclase 1 soluble subunit alpha 2 [Source:HGNC Symbol;Acc:HGNC:4684]	GUCY1A2
ENSG00000091409	integrin subunit alpha 6 [Source:HGNC Symbol;Acc:HGNC:6142]	ITGA6
ENSG00000091428	Rap guanine nucleotide exchange factor 4 [Source:HGNC Symbol;Acc:HGNC:16626]	RAPGEF4
ENSG00000184371	colony stimulating factor 1 [Source:HGNC Symbol;Acc:HGNC:2432]	CSF1
ENSG00000169313	purinergic receptor P2Y12 [Source:HGNC Symbol;Acc:HGNC:18124]	P2RY12
ENSG00000095752	interleukin 11 [Source:HGNC Symbol;Acc:HGNC:5966]	IL11
ENSG00000169860	purinergic receptor P2Y1 [Source:HGNC Symbol;Acc:HGNC:8539]	P2RY1
ENSG00000116473	RAP1A, member of RAS oncogene family [Source:HGNC Symbol;Acc:HGNC:9855]	RAP1A
ENSG00000196549	membrane metalloendopeptidase [Source:HGNC Symbol;Acc:HGNC:7154]	MME
ENSG00000150782	interleukin 18 [Source:HGNC Symbol;Acc:HGNC:5986]	IL18
ENSG00000166598	heat shock protein 90 beta family member 1 [Source:HGNC Symbol;Acc:HGNC:12028]	HSP90B1
ENSG00000121060	tripartite motif containing 25 [Source:HGNC Symbol;Acc:HGNC:12932]	TRIM25
ENSG00000120837	nuclear transcription factor Y subunit beta [Source:HGNC Symbol;Acc:HGNC:7805]	NFYB
ENSG00000228607	claudin 25 [Source:HGNC Symbol;Acc:HGNC:37218]	CLDN25
ENSG00000136450	serine and arginine rich splicing factor 1 [Source:HGNC Symbol;Acc:HGNC:10780]	SRSF1
ENSG00000005381	myeloperoxidase [Source:HGNC Symbol;Acc:HGNC:7218]	MPO
ENSG00000168811	interleukin 12A [Source:HGNC Symbol;Acc:HGNC:5969]	IL12A
ENSG00000213281	NRAS proto-oncogene, GTPase [Source:HGNC Symbol;Acc:HGNC:7989]	NRAS
ENSG00000013503	RNA polymerase III subunit B [Source:HGNC Symbol;Acc:HGNC:30348]	POLR3B
ENSG00000052723	suppressor of IKBKE 1 [Source:HGNC Symbol;Acc:HGNC:26119]	SIKE1
ENSG00000116824	CD2 molecule [Source:HGNC Symbol;Acc:HGNC:1639]	CD2
ENSG00000110876	selectin P ligand [Source:HGNC Symbol;Acc:HGNC:10722]	SELPLG
ENSG00000108443	ribosomal protein S6 kinase B1 [Source:HGNC Symbol;Acc:HGNC:10436]	RPS6KB1
ENSG00000115232	integrin subunit alpha 4 [Source:HGNC Symbol;Acc:HGNC:6140]	ITGA4
ENSG00000134250	notch receptor 2 [Source:HGNC Symbol;Acc:HGNC:7882]	NOTCH2
ENSG00000198851	CD3e molecule [Source:HGNC Symbol;Acc:HGNC:1674]	CD3E
ENSG00000167286	CD3d molecule [Source:HGNC Symbol;Acc:HGNC:1673]	CD3D
ENSG00000160654	CD3g molecule [Source:HGNC Symbol;Acc:HGNC:1675]	CD3G
ENSG00000163558	protein kinase C iota [Source:HGNC Symbol;Acc:HGNC:9404]	PRKCI
ENSG00000013297	claudin 11 [Source:HGNC Symbol;Acc:HGNC:8514]	CLDN11
ENSG00000003436	tissue factor pathway inhibitor [Source:HGNC Symbol;Acc:HGNC:11760]	TFPI
ENSG00000186141	RNA polymerase III subunit C [Source:HGNC Symbol;Acc:HGNC:30076]	POLR3C
ENSG00000160683	C-X-C motif chemokine receptor 5 [Source:HGNC Symbol;Acc:HGNC:1060]	CXCR5
ENSG00000168542	collagen type III alpha 1 chain [Source:HGNC Symbol;Acc:HGNC:2201]	COL3A1
ENSG00000121851	RNA polymerase III subunit GL [Source:HGNC Symbol;Acc:HGNC:28466]	POLR3GL
ENSG00000265972	thioredoxin interacting protein [Source:HGNC Symbol;Acc:HGNC:16952]	TXNIP
ENSG00000075651	phospholipase D1 [Source:HGNC Symbol;Acc:HGNC:9067]	PLD1
ENSG00000111229	actin related protein 2/3 complex subunit 3 [Source:HGNC Symbol;Acc:HGNC:706]	ARPC3
ENSG00000121858	TNF superfamily member 10 [Source:HGNC Symbol;Acc:HGNC:11925]	TNFSF10
ENSG00000188486	H2A.X variant histone [Source:HGNC Symbol;Acc:HGNC:4739]	H2AX
ENSG00000186298	protein phosphatase 1 catalytic subunit gamma [Source:HGNC Symbol;Acc:HGNC:9283]	PPP1CC
ENSG00000111245	myosin light chain 2 [Source:HGNC Symbol;Acc:HGNC:7583]	MYL2
ENSG00000160703	NLR family member X1 [Source:HGNC Symbol;Acc:HGNC:29890]	NLRX1
ENSG00000121879	phosphatidylinositol-4,5-bisphosphate 3-kinase catalytic subunit alpha [Source:HGNC Symbol;Acc:HGNC:8975]	PIK3CA
ENSG00000115415	signal transducer and activator of transcription 1 [Source:HGNC Symbol;Acc:HGNC:11362]	STAT1
ENSG00000171109	mitofusin 1 [Source:HGNC Symbol;Acc:HGNC:18262]	MFN1
ENSG00000154096	Thy-1 cell surface antigen [Source:HGNC Symbol;Acc:HGNC:11801]	THY1
ENSG00000007312	CD79b molecule [Source:HGNC Symbol;Acc:HGNC:1699]	CD79B
ENSG00000114450	G protein subunit beta 4 [Source:HGNC Symbol;Acc:HGNC:20731]	GNB4
ENSG00000108622	intercellular adhesion molecule 2 [Source:HGNC Symbol;Acc:HGNC:5345]	ICAM2
ENSG00000196914	Rho guanine nucleotide exchange factor 12 [Source:HGNC Symbol;Acc:HGNC:14193]	ARHGEF12
ENSG00000261371	platelet and endothelial cell adhesion molecule 1 [Source:HGNC Symbol;Acc:HGNC:8823]	PECAM1
ENSG00000138378	signal transducer and activator of transcription 4 [Source:HGNC Symbol;Acc:HGNC:11365]	STAT4
ENSG00000179295	protein tyrosine phosphatase non-receptor type 11 [Source:HGNC Symbol;Acc:HGNC:9644]	PTPN11
ENSG00000120063	G protein subunit alpha 13 [Source:HGNC Symbol;Acc:HGNC:4381]	GNA13
ENSG00000109971	heat shock protein family A (Hsp70) member 8 [Source:HGNC Symbol;Acc:HGNC:5241]	HSPA8
ENSG00000089127	2'-5'-oligoadenylate synthetase 1 [Source:HGNC Symbol;Acc:HGNC:8086]	OAS1
ENSG00000154229	protein kinase C alpha [Source:HGNC Symbol;Acc:HGNC:9393]	PRKCA
ENSG00000111331	2'-5'-oligoadenylate synthetase 3 [Source:HGNC Symbol;Acc:HGNC:8088]	OAS3
ENSG00000111335	2'-5'-oligoadenylate synthetase 2 [Source:HGNC Symbol;Acc:HGNC:8087]	OAS2
ENSG00000150337	Fc fragment of IgG receptor Ia [Source:HGNC Symbol;Acc:HGNC:3613]	FCGR1A
ENSG00000203814	H2B clustered histone 18 [Source:HGNC Symbol;Acc:HGNC:24700]	H2BC18
ENSG00000183598	H3 clustered histone 13 [Source:HGNC Symbol;Acc:HGNC:25311]	H3C13
ENSG00000270882	H4 clustered histone 14 [Source:HGNC Symbol;Acc:HGNC:4794]	H4C14
ENSG00000203811	H3 clustered histone 14 [Source:HGNC Symbol;Acc:HGNC:20503]	H3C14
ENSG00000203812	H2A clustered histone 18 [Source:HGNC Symbol;Acc:HGNC:4736]	H2AC18
ENSG00000272196	H2A clustered histone 19 [Source:HGNC Symbol;Acc:HGNC:29668]	H2AC19
ENSG00000203852	H3 clustered histone 15 [Source:HGNC Symbol;Acc:HGNC:20505]	H3C15
ENSG00000270276	H4 clustered histone 15 [Source:HGNC Symbol;Acc:HGNC:29607]	H4C15
ENSG00000184678	H2B clustered histone 21 [Source:HGNC Symbol;Acc:HGNC:4760]	H2BC21
ENSG00000184260	H2A clustered histone 20 [Source:HGNC Symbol;Acc:HGNC:4738]	H2AC20
ENSG00000184270	H2A clustered histone 21 [Source:HGNC Symbol;Acc:HGNC:20508]	H2AC21
ENSG00000149564	endothelial cell adhesion molecule [Source:HGNC Symbol;Acc:HGNC:17474]	ESAM
ENSG00000108984	mitogen-activated protein kinase kinase 6 [Source:HGNC Symbol;Acc:HGNC:6846]	MAP2K6
ENSG00000163131	cathepsin S [Source:HGNC Symbol;Acc:HGNC:2545]	CTSS
ENSG00000143387	cathepsin K [Source:HGNC Symbol;Acc:HGNC:2536]	CTSK
ENSG00000150455	TIR domain containing adaptor protein [Source:HGNC Symbol;Acc:HGNC:17192]	TIRAP
ENSG00000143398	phosphatidylinositol-4-phosphate 5-kinase type 1 alpha [Source:HGNC Symbol;Acc:HGNC:8994]	PIP5K1A
ENSG00000089159	paxillin [Source:HGNC Symbol;Acc:HGNC:9718]	PXN
ENSG00000143390	regulatory factor X5 [Source:HGNC Symbol;Acc:HGNC:9986]	RFX5
ENSG00000003400	caspase 10 [Source:HGNC Symbol;Acc:HGNC:1500]	CASP10
ENSG00000064012	caspase 8 [Source:HGNC Symbol;Acc:HGNC:1509]	CASP8
ENSG00000163882	RNA polymerase II, I and III subunit H [Source:HGNC Symbol;Acc:HGNC:9195]	POLR2H
ENSG00000090534	thrombopoietin [Source:HGNC Symbol;Acc:HGNC:11795]	THPO
ENSG00000089041	purinergic receptor P2X 7 [Source:HGNC Symbol;Acc:HGNC:8537]	P2RX7
ENSG00000143365	RAR related orphan receptor C [Source:HGNC Symbol;Acc:HGNC:10260]	RORC
ENSG00000166086	junctional adhesion molecule 3 [Source:HGNC Symbol;Acc:HGNC:15532]	JAM3
ENSG00000177885	growth factor receptor bound protein 2 [Source:HGNC Symbol;Acc:HGNC:4566]	GRB2
ENSG00000163220	S100 calcium binding protein A9 [Source:HGNC Symbol;Acc:HGNC:10499]	S100A9
ENSG00000143546	S100 calcium binding protein A8 [Source:HGNC Symbol;Acc:HGNC:10498]	S100A8
ENSG00000184330	S100 calcium binding protein A7A [Source:HGNC Symbol;Acc:HGNC:21657]	S100A7A
ENSG00000143556	S100 calcium binding protein A7 [Source:HGNC Symbol;Acc:HGNC:10497]	S100A7
ENSG00000089053	anaphase promoting complex subunit 5 [Source:HGNC Symbol;Acc:HGNC:15713]	ANAPC5
ENSG00000113889	kininogen 1 [Source:HGNC Symbol;Acc:HGNC:6383]	KNG1
ENSG00000276045	ORAI calcium release-activated calcium modulator 1 [Source:HGNC Symbol;Acc:HGNC:25896]	ORAI1
ENSG00000127241	mannan binding lectin serine peptidase 1 [Source:HGNC Symbol;Acc:HGNC:6901]	MASP1
ENSG00000132475	H3.3 histone B [Source:HGNC Symbol;Acc:HGNC:4765]	H3-3B
ENSG00000163347	claudin 1 [Source:HGNC Symbol;Acc:HGNC:2032]	CLDN1
ENSG00000113946	claudin 16 [Source:HGNC Symbol;Acc:HGNC:2037]	CLDN16
ENSG00000196083	interleukin 1 receptor accessory protein [Source:HGNC Symbol;Acc:HGNC:5995]	IL1RAP
ENSG00000253548	pyrin domain containing 2 [Source:HGNC Symbol;Acc:HGNC:33512]	PYDC2
ENSG00000178562	CD28 molecule [Source:HGNC Symbol;Acc:HGNC:1653]	CD28
ENSG00000163599	cytotoxic T-lymphocyte associated protein 4 [Source:HGNC Symbol;Acc:HGNC:2505]	CTLA4
ENSG00000163600	inducible T cell costimulator [Source:HGNC Symbol;Acc:HGNC:5351]	ICOS
ENSG00000160712	interleukin 6 receptor [Source:HGNC Symbol;Acc:HGNC:6019]	IL6R
ENSG00000176170	sphingosine kinase 1 [Source:HGNC Symbol;Acc:HGNC:11240]	SPHK1
ENSG00000160710	adenosine deaminase RNA specific [Source:HGNC Symbol;Acc:HGNC:225]	ADAR
ENSG00000178732	glycoprotein V platelet [Source:HGNC Symbol;Acc:HGNC:4443]	GP5
ENSG00000160691	SHC adaptor protein 1 [Source:HGNC Symbol;Acc:HGNC:10840]	SHC1
ENSG00000118260	cAMP responsive element binding protein 1 [Source:HGNC Symbol;Acc:HGNC:2345]	CREB1
ENSG00000072274	transferrin receptor [Source:HGNC Symbol;Acc:HGNC:11763]	TFRC
ENSG00000180370	p21 (RAC1) activated kinase 2 [Source:HGNC Symbol;Acc:HGNC:8591]	PAK2
ENSG00000075711	discs large MAGUK scaffold protein 1 [Source:HGNC Symbol;Acc:HGNC:2900]	DLG1
ENSG00000184009	actin gamma 1 [Source:HGNC Symbol;Acc:HGNC:144]	ACTG1
ENSG00000169750	Rac family small GTPase 3 [Source:HGNC Symbol;Acc:HGNC:9803]	RAC3
ENSG00000180871	C-X-C motif chemokine receptor 2 [Source:HGNC Symbol;Acc:HGNC:6027]	CXCR2
ENSG00000163464	C-X-C motif chemokine receptor 1 [Source:HGNC Symbol;Acc:HGNC:6026]	CXCR1
ENSG00000163466	actin related protein 2/3 complex subunit 2 [Source:HGNC Symbol;Acc:HGNC:705]	ARPC2
ENSG00000158473	CD1d molecule [Source:HGNC Symbol;Acc:HGNC:1637]	CD1D
ENSG00000158477	CD1a molecule [Source:HGNC Symbol;Acc:HGNC:1634]	CD1A
ENSG00000158481	CD1c molecule [Source:HGNC Symbol;Acc:HGNC:1636]	CD1C
ENSG00000158485	CD1b molecule [Source:HGNC Symbol;Acc:HGNC:1635]	CD1B
ENSG00000158488	CD1e molecule [Source:HGNC Symbol;Acc:HGNC:1638]	CD1E
ENSG00000173762	CD7 molecule [Source:HGNC Symbol;Acc:HGNC:1695]	CD7
ENSG00000163565	interferon gamma inducible protein 16 [Source:HGNC Symbol;Acc:HGNC:5395]	IFI16
ENSG00000163568	absent in melanoma 2 [Source:HGNC Symbol;Acc:HGNC:357]	AIM2
ENSG00000179639	Fc fragment of IgE receptor Ia [Source:HGNC Symbol;Acc:HGNC:3609]	FCER1A
ENSG00000117091	CD48 molecule [Source:HGNC Symbol;Acc:HGNC:1683]	CD48
ENSG00000122223	CD244 molecule [Source:HGNC Symbol;Acc:HGNC:18171]	CD244
ENSG00000158769	F11 receptor [Source:HGNC Symbol;Acc:HGNC:14685]	F11R
ENSG00000158869	Fc fragment of IgE receptor Ig [Source:HGNC Symbol;Acc:HGNC:3611]	FCER1G
ENSG00000143226	Fc fragment of IgG receptor IIa [Source:HGNC Symbol;Acc:HGNC:3616]	FCGR2A
ENSG00000173110	heat shock protein family A (Hsp70) member 6 [Source:HGNC Symbol;Acc:HGNC:5239]	HSPA6
ENSG00000203747	Fc fragment of IgG receptor IIIa [Source:HGNC Symbol;Acc:HGNC:3619]	FCGR3A
ENSG00000162747	Fc fragment of IgG receptor IIIb [Source:HGNC Symbol;Acc:HGNC:3620]	FCGR3B
ENSG00000072694	Fc fragment of IgG receptor IIb [Source:HGNC Symbol;Acc:HGNC:3618]	FCGR2B
ENSG00000198574	SH2 domain containing 1B [Source:HGNC Symbol;Acc:HGNC:30416]	SH2D1B
ENSG00000143171	retinoid X receptor gamma [Source:HGNC Symbol;Acc:HGNC:10479]	RXRG
ENSG00000115009	C-C motif chemokine ligand 20 [Source:HGNC Symbol;Acc:HGNC:10619]	CCL20
ENSG00000198821	CD247 molecule [Source:HGNC Symbol;Acc:HGNC:1677]	CD247
ENSG00000143185	X-C motif chemokine ligand 2 [Source:HGNC Symbol;Acc:HGNC:10646]	XCL2
ENSG00000143184	X-C motif chemokine ligand 1 [Source:HGNC Symbol;Acc:HGNC:10645]	XCL1
ENSG00000198734	coagulation factor V [Source:HGNC Symbol;Acc:HGNC:3542]	F5
ENSG00000174175	selectin P [Source:HGNC Symbol;Acc:HGNC:10721]	SELP
ENSG00000117560	Fas ligand [Source:HGNC Symbol;Acc:HGNC:11936]	FASLG
ENSG00000117601	serpin family C member 1 [Source:HGNC Symbol;Acc:HGNC:775]	SERPINC1
ENSG00000135828	ribonuclease L [Source:HGNC Symbol;Acc:HGNC:10050]	RNASEL
ENSG00000116701	neutrophil cytosolic factor 2 [Source:HGNC Symbol;Acc:HGNC:7661]	NCF2
ENSG00000162704	actin related protein 2/3 complex subunit 5 [Source:HGNC Symbol;Acc:HGNC:708]	ARPC5
ENSG00000068024	histone deacetylase 4 [Source:HGNC Symbol;Acc:HGNC:14063]	HDAC4
ENSG00000073756	prostaglandin-endoperoxide synthase 2 [Source:HGNC Symbol;Acc:HGNC:9605]	PTGS2
ENSG00000116711	phospholipase A2 group IVA [Source:HGNC Symbol;Acc:HGNC:9035]	PLA2G4A
ENSG00000000971	complement factor H [Source:HGNC Symbol;Acc:HGNC:4883]	CFH
ENSG00000116785	complement factor H related 3 [Source:HGNC Symbol;Acc:HGNC:16980]	CFHR3
ENSG00000244414	complement factor H related 1 [Source:HGNC Symbol;Acc:HGNC:4888]	CFHR1
ENSG00000134365	complement factor H related 4 [Source:HGNC Symbol;Acc:HGNC:16979]	CFHR4
ENSG00000080910	complement factor H related 2 [Source:HGNC Symbol;Acc:HGNC:4890]	CFHR2
ENSG00000134389	complement factor H related 5 [Source:HGNC Symbol;Acc:HGNC:24668]	CFHR5
ENSG00000143278	coagulation factor XIII B chain [Source:HGNC Symbol;Acc:HGNC:3534]	F13B
ENSG00000151414	NIMA related kinase 7 [Source:HGNC Symbol;Acc:HGNC:13386]	NEK7
ENSG00000263528	inhibitor of nuclear factor kappa B kinase subunit epsilon [Source:HGNC Symbol;Acc:HGNC:14552]	IKBKE
ENSG00000266094	Ras association domain family member 5 [Source:HGNC Symbol;Acc:HGNC:17609]	RASSF5
ENSG00000162889	MAPK activated protein kinase 2 [Source:HGNC Symbol;Acc:HGNC:6887]	MAPKAPK2
ENSG00000136634	interleukin 10 [Source:HGNC Symbol;Acc:HGNC:5962]	IL10
ENSG00000162896	polymeric immunoglobulin receptor [Source:HGNC Symbol;Acc:HGNC:8968]	PIGR
ENSG00000123843	complement component 4 binding protein beta [Source:HGNC Symbol;Acc:HGNC:1328]	C4BPB
ENSG00000123838	complement component 4 binding protein alpha [Source:HGNC Symbol;Acc:HGNC:1325]	C4BPA
ENSG00000196352	CD55 molecule (Cromer blood group) [Source:HGNC Symbol;Acc:HGNC:2665]	CD55
ENSG00000117322	complement C3d receptor 2 [Source:HGNC Symbol;Acc:HGNC:2336]	CR2
ENSG00000203710	complement C3b/C4b receptor 1 (Knops blood group) [Source:HGNC Symbol;Acc:HGNC:2334]	CR1
ENSG00000197721	complement C3b/C4b receptor 1 like [Source:HGNC Symbol;Acc:HGNC:2335]	CR1L
ENSG00000117335	CD46 molecule [Source:HGNC Symbol;Acc:HGNC:6953]	CD46
ENSG00000174059	CD34 molecule [Source:HGNC Symbol;Acc:HGNC:1662]	CD34
ENSG00000082512	TNF receptor associated factor 5 [Source:HGNC Symbol;Acc:HGNC:12035]	TRAF5
ENSG00000187554	toll like receptor 5 [Source:HGNC Symbol;Acc:HGNC:11851]	TLR5
ENSG00000163041	H3.3 histone A [Source:HGNC Symbol;Acc:HGNC:4764]	H3-3A
ENSG00000162711	NLR family pyrin domain containing 3 [Source:HGNC Symbol;Acc:HGNC:16400]	NLRP3
