# Supplementary material for: A Computational Analysis in a Cohort of Parkinson’s Disease Patients and Clock-Modified Colorectal Cancer Cells Reveals Common Expression Alterations in Clock-Regulated Genes
Source: Cancers (Basel). 2021 Nov 28;13(23):5978. doi: 10.3390/cancers13235978 (PMC8657387; doi:10.3390/cancers13235978)
Supplement: Supplementary file 1 [file cancers-13-05978-s001.zip › Supplementary_Files/Yalcinetal_Supplementary_Tables/Supplementary Table 3.xlsx]

## Sheet: Sheet1
Supplementary Table 3. The list of genes pre-selected from KEGG pathways DNA replication and repair
Gene.stable.ID	Gene.description	Gene.name
ENSG00000276910	general transcription factor IIH subunit 2 [Source:HGNC Symbol;Acc:HGNC:4656]	GTF2H2
ENSG00000262771	single stranded DNA binding protein 1 [Source:HGNC Symbol;Acc:HGNC:11317]	SSBP1
ENSG00000277273	cyclin dependent kinase 7 [Source:HGNC Symbol;Acc:HGNC:1778]	CDK7
ENSG00000276787	FANCD2 and FANCI associated nuclease 1 [Source:HGNC Symbol;Acc:HGNC:29170]	FAN1
ENSG00000274675	GTF2H2 family member C, copy 2 [Source:HGNC Symbol;Acc:HGNC:35418]	GTF2H2C_2
ENSG00000234370	general transcription factor IIH subunit 4 [Source:HGNC Symbol;Acc:HGNC:4658]	GTF2H4
ENSG00000102699	poly(ADP-ribose) polymerase family member 4 [Source:HGNC Symbol;Acc:HGNC:271]	PARP4
ENSG00000189403	high mobility group box 1 [Source:HGNC Symbol;Acc:HGNC:4983]	HMGB1
ENSG00000139618	BRCA2 DNA repair associated [Source:HGNC Symbol;Acc:HGNC:1101]	BRCA2
ENSG00000133119	replication factor C subunit 3 [Source:HGNC Symbol;Acc:HGNC:9971]	RFC3
ENSG00000284238	DNA topoisomerase III alpha [Source:HGNC Symbol;Acc:HGNC:11992]	TOP3A
ENSG00000132646	proliferating cell nuclear antigen [Source:HGNC Symbol;Acc:HGNC:8729]	PCNA
ENSG00000100038	DNA topoisomerase III beta [Source:HGNC Symbol;Acc:HGNC:11993]	TOP3B
ENSG00000181544	FA complementation group B [Source:HGNC Symbol;Acc:HGNC:3583]	FANCB
ENSG00000288114	general transcription factor IIH subunit 1 [Source:HGNC Symbol;Acc:HGNC:4655]	GTF2H1
ENSG00000136104	ribonuclease H2 subunit B [Source:HGNC Symbol;Acc:HGNC:25671]	RNASEH2B
ENSG00000103152	N-methylpurine DNA glycosylase [Source:HGNC Symbol;Acc:HGNC:7211]	MPG
ENSG00000101868	DNA polymerase alpha 1, catalytic subunit [Source:HGNC Symbol;Acc:HGNC:9173]	POLA1
ENSG00000152457	DNA cross-link repair 1C [Source:HGNC Symbol;Acc:HGNC:17642]	DCLRE1C
ENSG00000100726	telomere maintenance 2 [Source:HGNC Symbol;Acc:HGNC:29099]	TELO2
ENSG00000122512	PMS1 homolog 2, mismatch repair system component [Source:HGNC Symbol;Acc:HGNC:9122]	PMS2
ENSG00000154328	nei like DNA glycosylase 2 [Source:HGNC Symbol;Acc:HGNC:18956]	NEIL2
ENSG00000197774	essential meiotic structure-specific endonuclease subunit 2 [Source:HGNC Symbol;Acc:HGNC:27289]	EME2
ENSG00000221829	FA complementation group G [Source:HGNC Symbol;Acc:HGNC:3588]	FANCG
ENSG00000129484	poly(ADP-ribose) polymerase 2 [Source:HGNC Symbol;Acc:HGNC:272]	PARP2
ENSG00000106399	replication protein A3 [Source:HGNC Symbol;Acc:HGNC:10291]	RPA3
ENSG00000114026	8-oxoguanine DNA glycosylase [Source:HGNC Symbol;Acc:HGNC:8125]	OGG1
ENSG00000100823	apurinic/apyrimidinic endodeoxyribonuclease 1 [Source:HGNC Symbol;Acc:HGNC:587]	APEX1
ENSG00000065057	nth like DNA glycosylase 1 [Source:HGNC Symbol;Acc:HGNC:8028]	NTHL1
ENSG00000270181	BIVM-ERCC5 readthrough [Source:HGNC Symbol;Acc:HGNC:43690]	BIVM-ERCC5
ENSG00000134899	ERCC excision repair 5, endonuclease [Source:HGNC Symbol;Acc:HGNC:3437]	ERCC5
ENSG00000174405	DNA ligase 4 [Source:HGNC Symbol;Acc:HGNC:6601]	LIG4
ENSG00000144554	FA complementation group D2 [Source:HGNC Symbol;Acc:HGNC:3585]	FANCD2
ENSG00000171865	ribonuclease H1 [Source:HGNC Symbol;Acc:HGNC:18466]	RNASEH1
ENSG00000100297	minichromosome maintenance complex component 5 [Source:HGNC Symbol;Acc:HGNC:6948]	MCM5
ENSG00000139842	cullin 4A [Source:HGNC Symbol;Acc:HGNC:2554]	CUL4A
ENSG00000130997	DNA polymerase nu [Source:HGNC Symbol;Acc:HGNC:18870]	POLN
ENSG00000154767	XPC complex subunit, DNA damage recognition and repair factor [Source:HGNC Symbol;Acc:HGNC:12816]	XPC
ENSG00000101773	RB binding protein 8, endonuclease [Source:HGNC Symbol;Acc:HGNC:9891]	RBBP8
ENSG00000188827	SLX4 structure-specific endonuclease subunit [Source:HGNC Symbol;Acc:HGNC:23845]	SLX4
ENSG00000132383	replication protein A1 [Source:HGNC Symbol;Acc:HGNC:10289]	RPA1
ENSG00000100387	ring-box 1 [Source:HGNC Symbol;Acc:HGNC:9928]	RBX1
ENSG00000002016	RAD52 homolog, DNA repair protein [Source:HGNC Symbol;Acc:HGNC:9824]	RAD52
ENSG00000225830	ERCC excision repair 6, chromatin remodeling factor [Source:HGNC Symbol;Acc:HGNC:3438]	ERCC6
ENSG00000196419	X-ray repair cross complementing 6 [Source:HGNC Symbol;Acc:HGNC:4055]	XRCC6
ENSG00000178966	RecQ mediated genome instability 1 [Source:HGNC Symbol;Acc:HGNC:25764]	RMI1
ENSG00000169188	apurinic/apyrimidinic endodeoxyribonuclease 2 [Source:HGNC Symbol;Acc:HGNC:17889]	APEX2
ENSG00000158019	BRISC and BRCA1 A complex member 2 [Source:HGNC Symbol;Acc:HGNC:1106]	BABAM2
ENSG00000122678	DNA polymerase mu [Source:HGNC Symbol;Acc:HGNC:9185]	POLM
ENSG00000106628	DNA polymerase delta 2, accessory subunit [Source:HGNC Symbol;Acc:HGNC:9176]	POLD2
ENSG00000158169	FA complementation group C [Source:HGNC Symbol;Acc:HGNC:3584]	FANCC
ENSG00000138346	DNA replication helicase/nuclease 2 [Source:HGNC Symbol;Acc:HGNC:2939]	DNA2
ENSG00000175643	RecQ mediated genome instability 2 [Source:HGNC Symbol;Acc:HGNC:28349]	RMI2
ENSG00000051180	RAD51 recombinase [Source:HGNC Symbol;Acc:HGNC:9817]	RAD51
ENSG00000035928	replication factor C subunit 1 [Source:HGNC Symbol;Acc:HGNC:9969]	RFC1
ENSG00000175595	ERCC excision repair 4, endonuclease catalytic subunit [Source:HGNC Symbol;Acc:HGNC:3436]	ERCC4
ENSG00000076242	mutL homolog 1 [Source:HGNC Symbol;Acc:HGNC:7127]	MLH1
ENSG00000136936	XPA, DNA damage recognition and repair factor [Source:HGNC Symbol;Acc:HGNC:12814]	XPA
ENSG00000251503	CENPS-CORT readthrough [Source:HGNC Symbol;Acc:HGNC:38843]	CENPS-CORT
ENSG00000175279	centromere protein S [Source:HGNC Symbol;Acc:HGNC:23163]	CENPS
ENSG00000049167	ERCC excision repair 8, CSA ubiquitin ligase complex subunit [Source:HGNC Symbol;Acc:HGNC:3439]	ERCC8
ENSG00000119318	RAD23 homolog B, nucleotide excision repair protein [Source:HGNC Symbol;Acc:HGNC:9813]	RAD23B
ENSG00000183161	FA complementation group F [Source:HGNC Symbol;Acc:HGNC:3587]	FANCF
ENSG00000101751	DNA polymerase iota [Source:HGNC Symbol;Acc:HGNC:9182]	POLI
ENSG00000070501	DNA polymerase beta [Source:HGNC Symbol;Acc:HGNC:9174]	POLB
ENSG00000204086	replication protein A4 [Source:HGNC Symbol;Acc:HGNC:30305]	RPA4
ENSG00000114742	WD repeat domain 48 [Source:HGNC Symbol;Acc:HGNC:30914]	WDR48
ENSG00000104889	ribonuclease H2 subunit A [Source:HGNC Symbol;Acc:HGNC:18518]	RNASEH2A
ENSG00000253729	protein kinase, DNA-activated, catalytic subunit [Source:HGNC Symbol;Acc:HGNC:9413]	PRKDC
ENSG00000104738	minichromosome maintenance complex component 4 [Source:HGNC Symbol;Acc:HGNC:6947]	MCM4
ENSG00000179262	RAD23 homolog A, nucleotide excision repair protein [Source:HGNC Symbol;Acc:HGNC:9812]	RAD23A
ENSG00000148229	DNA polymerase epsilon 3, accessory subunit [Source:HGNC Symbol;Acc:HGNC:13546]	POLE3
ENSG00000187790	FA complementation group M [Source:HGNC Symbol;Acc:HGNC:23168]	FANCM
ENSG00000095002	mutS homolog 2 [Source:HGNC Symbol;Acc:HGNC:7325]	MSH2
ENSG00000116062	mutS homolog 6 [Source:HGNC Symbol;Acc:HGNC:7329]	MSH6
ENSG00000112039	FA complementation group E [Source:HGNC Symbol;Acc:HGNC:3586]	FANCE
ENSG00000100479	DNA polymerase epsilon 2, accessory subunit [Source:HGNC Symbol;Acc:HGNC:9178]	POLE2
ENSG00000183474	GTF2H2 family member C [Source:HGNC Symbol;Acc:HGNC:31394]	GTF2H2C
ENSG00000083093	partner and localizer of BRCA2 [Source:HGNC Symbol;Acc:HGNC:26144]	PALB2
ENSG00000049541	replication factor C subunit 2 [Source:HGNC Symbol;Acc:HGNC:9970]	RFC2
ENSG00000158290	cullin 4B [Source:HGNC Symbol;Acc:HGNC:2555]	CUL4B
ENSG00000122008	DNA polymerase kappa [Source:HGNC Symbol;Acc:HGNC:9183]	POLK
ENSG00000115392	FA complementation group L [Source:HGNC Symbol;Acc:HGNC:20748]	FANCL
ENSG00000164053	ATR interacting protein [Source:HGNC Symbol;Acc:HGNC:33499]	ATRIP
ENSG00000170734	DNA polymerase eta [Source:HGNC Symbol;Acc:HGNC:9181]	POLH
ENSG00000134574	damage specific DNA binding protein 2 [Source:HGNC Symbol;Acc:HGNC:2718]	DDB2
ENSG00000113318	mutS homolog 3 [Source:HGNC Symbol;Acc:HGNC:7326]	MSH3
ENSG00000020426	MNAT1 component of CDK activating kinase [Source:HGNC Symbol;Acc:HGNC:7181]	MNAT1
ENSG00000181625	SLX1 homolog B, structure-specific endonuclease subunit [Source:HGNC Symbol;Acc:HGNC:28748]	SLX1B
ENSG00000152422	X-ray repair cross complementing 4 [Source:HGNC Symbol;Acc:HGNC:12831]	XRCC4
ENSG00000105393	BRISC and BRCA1 A complex member 1 [Source:HGNC Symbol;Acc:HGNC:25008]	BABAM1
ENSG00000134480	cyclin H [Source:HGNC Symbol;Acc:HGNC:1594]	CCNH
ENSG00000112118	minichromosome maintenance complex component 3 [Source:HGNC Symbol;Acc:HGNC:6945]	MCM3
ENSG00000104320	nibrin [Source:HGNC Symbol;Acc:HGNC:7652]	NBN
ENSG00000117748	replication protein A2 [Source:HGNC Symbol;Acc:HGNC:10290]	RPA2
ENSG00000132207	SLX1 homolog A, structure-specific endonuclease subunit [Source:HGNC Symbol;Acc:HGNC:20922]	SLX1A
ENSG00000163322	abraxas 1, BRCA1 A complex subunit [Source:HGNC Symbol;Acc:HGNC:25829]	ABRAXAS1
ENSG00000197275	RAD54 homolog B [Source:HGNC Symbol;Acc:HGNC:17228]	RAD54B
ENSG00000182185	RAD51 paralog B [Source:HGNC Symbol;Acc:HGNC:9822]	RAD51B
ENSG00000147400	centrin 2 [Source:HGNC Symbol;Acc:HGNC:1867]	CETN2
ENSG00000146143	DNA primase subunit 2 [Source:HGNC Symbol;Acc:HGNC:9370]	PRIM2
ENSG00000041880	poly(ADP-ribose) polymerase family member 3 [Source:HGNC Symbol;Acc:HGNC:273]	PARP3
ENSG00000107447	DNA nucleotidylexotransferase [Source:HGNC Symbol;Acc:HGNC:2983]	DNTT
ENSG00000131944	FA core complex associated protein 24 [Source:HGNC Symbol;Acc:HGNC:28467]	FAAP24
ENSG00000167986	damage specific DNA binding protein 1 [Source:HGNC Symbol;Acc:HGNC:2717]	DDB1
ENSG00000115350	DNA polymerase epsilon 4, accessory subunit [Source:HGNC Symbol;Acc:HGNC:18755]	POLE4
ENSG00000127922	SEM1 26S proteasome complex subunit [Source:HGNC Symbol;Acc:HGNC:10845]	SEM1
ENSG00000119684	mutL homolog 3 [Source:HGNC Symbol;Acc:HGNC:7128]	MLH3
ENSG00000185515	BRCA1/BRCA2-containing complex subunit 3 [Source:HGNC Symbol;Acc:HGNC:24185]	BRCC3
ENSG00000168496	flap structure-specific endonuclease 1 [Source:HGNC Symbol;Acc:HGNC:3650]	FEN1
ENSG00000166169	DNA polymerase lambda [Source:HGNC Symbol;Acc:HGNC:9184]	POLL
ENSG00000005156	DNA ligase 3 [Source:HGNC Symbol;Acc:HGNC:6600]	LIG3
ENSG00000166508	minichromosome maintenance complex component 7 [Source:HGNC Symbol;Acc:HGNC:6950]	MCM7
ENSG00000185379	RAD51 paralog D [Source:HGNC Symbol;Acc:HGNC:9823]	RAD51D
ENSG00000113522	RAD50 double strand break repair protein [Source:HGNC Symbol;Acc:HGNC:9816]	RAD50
ENSG00000135945	REV1 DNA directed polymerase [Source:HGNC Symbol;Acc:HGNC:14060]	REV1
ENSG00000014138	DNA polymerase alpha 2, accessory subunit [Source:HGNC Symbol;Acc:HGNC:30073]	POLA2
ENSG00000009413	REV3 like, DNA directed polymerase zeta catalytic subunit [Source:HGNC Symbol;Acc:HGNC:9968]	REV3L
ENSG00000123415	single-strand-selective monofunctional uracil-DNA glycosylase 1 [Source:HGNC Symbol;Acc:HGNC:17148]	SMUG1
ENSG00000140398	nei like DNA glycosylase 1 [Source:HGNC Symbol;Acc:HGNC:18448]	NEIL1
ENSG00000172922	ribonuclease H2 subunit C [Source:HGNC Symbol;Acc:HGNC:24116]	RNASEH2C
ENSG00000172732	MUS81 structure-specific endonuclease subunit [Source:HGNC Symbol;Acc:HGNC:29814]	MUS81
ENSG00000132781	mutY DNA glycosylase [Source:HGNC Symbol;Acc:HGNC:7527]	MUTYH
ENSG00000085999	RAD54 like [Source:HGNC Symbol;Acc:HGNC:9826]	RAD54L
ENSG00000175482	DNA polymerase delta 4, accessory subunit [Source:HGNC Symbol;Acc:HGNC:14106]	POLD4
ENSG00000073050	X-ray repair cross complementing 1 [Source:HGNC Symbol;Acc:HGNC:12828]	XRCC1
ENSG00000198056	DNA primase subunit 1 [Source:HGNC Symbol;Acc:HGNC:9369]	PRIM1
ENSG00000126215	X-ray repair cross complementing 3 [Source:HGNC Symbol;Acc:HGNC:12830]	XRCC3
ENSG00000012048	BRCA1 DNA repair associated [Source:HGNC Symbol;Acc:HGNC:1100]	BRCA1
ENSG00000104884	ERCC excision repair 2, TFIIH core complex helicase subunit [Source:HGNC Symbol;Acc:HGNC:3434]	ERCC2
ENSG00000012061	ERCC excision repair 1, endonuclease non-catalytic subunit [Source:HGNC Symbol;Acc:HGNC:3433]	ERCC1
ENSG00000163161	ERCC excision repair 3, TFIIH core complex helicase subunit [Source:HGNC Symbol;Acc:HGNC:3435]	ERCC3
ENSG00000162607	ubiquitin specific peptidase 1 [Source:HGNC Symbol;Acc:HGNC:12607]	USP1
ENSG00000140525	FA complementation group I [Source:HGNC Symbol;Acc:HGNC:25568]	FANCI
ENSG00000105486	DNA ligase 1 [Source:HGNC Symbol;Acc:HGNC:6598]	LIG1
ENSG00000197299	BLM RecQ like helicase [Source:HGNC Symbol;Acc:HGNC:1058]	BLM
ENSG00000076003	minichromosome maintenance complex component 6 [Source:HGNC Symbol;Acc:HGNC:6949]	MCM6
ENSG00000073111	minichromosome maintenance complex component 2 [Source:HGNC Symbol;Acc:HGNC:6944]	MCM2
ENSG00000077514	DNA polymerase delta 3, accessory subunit [Source:HGNC Symbol;Acc:HGNC:20932]	POLD3
ENSG00000129071	methyl-CpG binding domain 4, DNA glycosylase [Source:HGNC Symbol;Acc:HGNC:6919]	MBD4
ENSG00000187741	FA complementation group A [Source:HGNC Symbol;Acc:HGNC:3582]	FANCA
ENSG00000154920	essential meiotic structure-specific endonuclease 1 [Source:HGNC Symbol;Acc:HGNC:24965]	EME1
ENSG00000087206	ubiquitin interaction motif containing 1 [Source:HGNC Symbol;Acc:HGNC:30298]	UIMC1
ENSG00000163781	DNA topoisomerase II binding protein 1 [Source:HGNC Symbol;Acc:HGNC:17008]	TOPBP1
ENSG00000062822	DNA polymerase delta 1, catalytic subunit [Source:HGNC Symbol;Acc:HGNC:9175]	POLD1
ENSG00000272047	general transcription factor IIH subunit 5 [Source:HGNC Symbol;Acc:HGNC:21157]	GTF2H5
ENSG00000109674	nei like DNA glycosylase 3 [Source:HGNC Symbol;Acc:HGNC:24573]	NEIL3
ENSG00000020922	MRE11 homolog, double strand break repair nuclease [Source:HGNC Symbol;Acc:HGNC:7230]	MRE11
ENSG00000175054	ATR serine/threonine kinase [Source:HGNC Symbol;Acc:HGNC:882]	ATR
ENSG00000196584	X-ray repair cross complementing 2 [Source:HGNC Symbol;Acc:HGNC:12829]	XRCC2
ENSG00000149311	ATM serine/threonine kinase [Source:HGNC Symbol;Acc:HGNC:795]	ATM
ENSG00000139351	synaptonemal complex protein 3 [Source:HGNC Symbol;Acc:HGNC:18130]	SYCP3
ENSG00000139372	thymine DNA glycosylase [Source:HGNC Symbol;Acc:HGNC:11700]	TDG
ENSG00000108384	RAD51 paralog C [Source:HGNC Symbol;Acc:HGNC:9820]	RAD51C
ENSG00000076248	uracil DNA glycosylase [Source:HGNC Symbol;Acc:HGNC:12572]	UNG
ENSG00000136492	BRCA1 interacting protein C-terminal helicase 1 [Source:HGNC Symbol;Acc:HGNC:20473]	BRIP1
ENSG00000111445	replication factor C subunit 5 [Source:HGNC Symbol;Acc:HGNC:9973]	RFC5
ENSG00000163918	replication factor C subunit 4 [Source:HGNC Symbol;Acc:HGNC:9972]	RFC4
ENSG00000114315	hes family bHLH transcription factor 1 [Source:HGNC Symbol;Acc:HGNC:5192]	HES1
ENSG00000111358	general transcription factor IIH subunit 3 [Source:HGNC Symbol;Acc:HGNC:4657]	GTF2H3
ENSG00000138376	BRCA1 associated RING domain 1 [Source:HGNC Symbol;Acc:HGNC:952]	BARD1
ENSG00000177084	DNA polymerase epsilon, catalytic subunit [Source:HGNC Symbol;Acc:HGNC:9177]	POLE
ENSG00000185504	FA core complex associated protein 100 [Source:HGNC Symbol;Acc:HGNC:26171]	FAAP100
ENSG00000079246	X-ray repair cross complementing 5 [Source:HGNC Symbol;Acc:HGNC:12833]	XRCC5
ENSG00000169689	centromere protein X [Source:HGNC Symbol;Acc:HGNC:11422]	CENPX
ENSG00000187736	non-homologous end joining factor 1 [Source:HGNC Symbol;Acc:HGNC:25737]	NHEJ1
ENSG00000077152	ubiquitin conjugating enzyme E2 T [Source:HGNC Symbol;Acc:HGNC:25009]	UBE2T
ENSG00000143799	poly(ADP-ribose) polymerase 1 [Source:HGNC Symbol;Acc:HGNC:270]	PARP1
ENSG00000174371	exonuclease 1 [Source:HGNC Symbol;Acc:HGNC:3511]	EXO1
