# Supplementary material for: A Computational Analysis in a Cohort of Parkinson’s Disease Patients and Clock-Modified Colorectal Cancer Cells Reveals Common Expression Alterations in Clock-Regulated Genes
Source: Cancers (Basel). 2021 Nov 28;13(23):5978. doi: 10.3390/cancers13235978 (PMC8657387; doi:10.3390/cancers13235978)
Supplement: Supplementary file 1 [file cancers-13-05978-s001.zip › Supplementary_Files/Yalcinetal_Supplementary_Tables/Supplementary Table 7.xlsx]

## Sheet: Sheet1
Supplementary Table 7. The list of genes pre-elected from KEGG pathways involved in Parkinson's Disease and genes involved in PD associated disorders Restless legs syndrome (RLS) with possible circadian influences
Gene.stable.ID	Gene.description	Gene.name	Literature.Source	DOI
ENSG00000159640	angiotensin I converting enzyme [Source:HGNC Symbol;Acc:HGNC:2707]	ACE	Lenka et al., 2016, Journal of Neurological Sciences	10.1016/j.jns.2016.03.005
ENSG00000276286	ADAM metallopeptidase domain 2 [Source:HGNC Symbol;Acc:HGNC:198]	ADAM2	Schormair et al., 2017, Lancet Neurology	10.1016/S1474-4422(17)30327-7
ENSG00000173175	adenylate cyclase 5 [Source:HGNC Symbol;Acc:HGNC:236]	ADCY5	KEGG_PD_Pathway
ENSG00000128271	adenosine A2a receptor [Source:HGNC Symbol;Acc:HGNC:263]	ADORA2A	KEGG_PD_Pathway
ENSG00000130706	adhesion regulating molecule 1 [Source:HGNC Symbol;Acc:HGNC:15759]	ADRM1	KEGG_PD_Pathway
ENSG00000170209	ankyrin repeat and kinase domain containing 1 [Source:HGNC Symbol;Acc:HGNC:21027]	ANKK1	Rieck et al., 2012, Pharmacogenomics	https://doi.org/10.2217/pgs.12.149
ENSG00000120868	apoptotic peptidase activating factor 1 [Source:HGNC Symbol;Acc:HGNC:576]	APAF1	KEGG_PD_Pathway
ENSG00000169621	aprataxin and PNKP like factor [Source:HGNC Symbol;Acc:HGNC:28724]	APLF	Schormair et al., 2017, Lancet Neurology	10.1016/S1474-4422(17)30327-7
ENSG00000130203	apolipoprotein E [Source:HGNC Symbol;Acc:HGNC:613]	APOE	Lenka et al., 2016, Journal of Neurological Sciences	10.1016/j.jns.2016.03.005
ENSG00000034533	asteroid homolog 1 [Source:HGNC Symbol;Acc:HGNC:25021]	ASTE1	Schormair et al., 2017, Lancet Neurology	10.1016/S1474-4422(17)30327-7
ENSG00000128272	activating transcription factor 4 [Source:HGNC Symbol;Acc:HGNC:786]	ATF4	KEGG_PD_Pathway
ENSG00000118217	activating transcription factor 6 [Source:HGNC Symbol;Acc:HGNC:791]	ATF6	KEGG_PD_Pathway
ENSG00000159363	ATPase cation transporting 13A2 [Source:HGNC Symbol;Acc:HGNC:30213]	ATP13A2	1. Vilageliu and Grinberg et al., 2017, Current Protein & Peptide Science 2. Lunati et al., 2018, Revue Neurologique	1. 10.2174/1389203717666160311115956 2. 10.1016/j.neurol.2018.08.004
ENSG00000017260	ATPase secretory pathway Ca2+ transporting 1 [Source:HGNC Symbol;Acc:HGNC:13211]	ATP2C1	Schormair et al., 2017, Lancet Neurology	10.1016/S1474-4422(17)30327-7
ENSG00000152234	ATP synthase F1 subunit alpha [Source:HGNC Symbol;Acc:HGNC:823]	ATP5F1A	KEGG_PD_Pathway
ENSG00000110955	ATP synthase F1 subunit beta [Source:HGNC Symbol;Acc:HGNC:830]	ATP5F1B	KEGG_PD_Pathway
ENSG00000165629	ATP synthase F1 subunit gamma [Source:HGNC Symbol;Acc:HGNC:833]	ATP5F1C	KEGG_PD_Pathway
ENSG00000099624	ATP synthase F1 subunit delta [Source:HGNC Symbol;Acc:HGNC:837]	ATP5F1D	KEGG_PD_Pathway
ENSG00000124172	ATP synthase F1 subunit epsilon [Source:HGNC Symbol;Acc:HGNC:838]	ATP5F1E	KEGG_PD_Pathway
ENSG00000159199	ATP synthase membrane subunit c locus 1 [Source:HGNC Symbol;Acc:HGNC:841]	ATP5MC1	KEGG_PD_Pathway
ENSG00000135390	ATP synthase membrane subunit c locus 2 [Source:HGNC Symbol;Acc:HGNC:842]	ATP5MC2	KEGG_PD_Pathway
ENSG00000154518	ATP synthase membrane subunit c locus 3 [Source:HGNC Symbol;Acc:HGNC:843]	ATP5MC3	KEGG_PD_Pathway
ENSG00000116459	ATP synthase peripheral stalk-membrane subunit b [Source:HGNC Symbol;Acc:HGNC:840]	ATP5PB	KEGG_PD_Pathway
ENSG00000167863	ATP synthase peripheral stalk subunit d [Source:HGNC Symbol;Acc:HGNC:845]	ATP5PD	KEGG_PD_Pathway
ENSG00000154723	ATP synthase peripheral stalk subunit F6 [Source:HGNC Symbol;Acc:HGNC:847]	ATP5PF	KEGG_PD_Pathway
ENSG00000241837	ATP synthase peripheral stalk subunit OSCP [Source:HGNC Symbol;Acc:HGNC:850]	ATP5PO	KEGG_PD_Pathway
ENSG00000204842	ataxin 2 [Source:HGNC Symbol;Acc:HGNC:10555]	ATXN2	1. Vilageliu and Grinberg et al., 2017, Current Protein & Peptide Science 2. Lunati et al., 2018, Revue Neurologique	1. 10.2174/1389203717666160311115956 2. 10.1016/j.neurol.2018.08.004
ENSG00000087088	BCL2 associated X, apoptosis regulator [Source:HGNC Symbol;Acc:HGNC:959]	BAX	KEGG_PD_Pathway
ENSG00000171552	BCL2 like 1 [Source:HGNC Symbol;Acc:HGNC:992]	BCL2L1	KEGG_PD_Pathway
ENSG00000176697	brain derived neurotrophic factor [Source:HGNC Symbol;Acc:HGNC:1033]	BDNF	Foltynie et al., 2005, Journal of Neurology	https://doi.org/10.1007/s00415-005-0756-5
ENSG00000109743	bone marrow stromal cell antigen 1 [Source:HGNC Symbol;Acc:HGNC:1118]	BST1	Mufti et al., 2021, Neurology	10.1212/WNL.0000000000011464
ENSG00000183826	BTB domain containing 9 [Source:HGNC Symbol;Acc:HGNC:21228]	BTBD9	Schormair et al., 2017, Lancet Neurology	10.1016/S1474-4422(17)30327-7
ENSG00000197223	C1D nuclear receptor corepressor [Source:HGNC Symbol;Acc:HGNC:29911]	C1D	Schormair et al., 2017, Lancet Neurology	10.1016/S1474-4422(17)30327-7
ENSG00000198668	calmodulin 1 [Source:HGNC Symbol;Acc:HGNC:1442]	CALM1	KEGG_PD_Pathway
ENSG00000143933	calmodulin 2 [Source:HGNC Symbol;Acc:HGNC:1445]	CALM2	KEGG_PD_Pathway
ENSG00000160014	calmodulin 3 [Source:HGNC Symbol;Acc:HGNC:1449]	CALM3	KEGG_PD_Pathway
ENSG00000178363	calmodulin like 3 [Source:HGNC Symbol;Acc:HGNC:1452]	CALML3	KEGG_PD_Pathway
ENSG00000129007	calmodulin like 4 [Source:HGNC Symbol;Acc:HGNC:18445]	CALML4	KEGG_PD_Pathway
ENSG00000178372	calmodulin like 5 [Source:HGNC Symbol;Acc:HGNC:18180]	CALML5	KEGG_PD_Pathway
ENSG00000169885	calmodulin like 6 [Source:HGNC Symbol;Acc:HGNC:24193]	CALML6	KEGG_PD_Pathway
ENSG00000070808	calcium/calmodulin dependent protein kinase II alpha [Source:HGNC Symbol;Acc:HGNC:1460]	CAMK2A	KEGG_PD_Pathway
ENSG00000058404	calcium/calmodulin dependent protein kinase II beta [Source:HGNC Symbol;Acc:HGNC:1461]	CAMK2B	KEGG_PD_Pathway
ENSG00000145349	calcium/calmodulin dependent protein kinase II delta [Source:HGNC Symbol;Acc:HGNC:1462]	CAMK2D	KEGG_PD_Pathway
ENSG00000148660	calcium/calmodulin dependent protein kinase II gamma [Source:HGNC Symbol;Acc:HGNC:1463]	CAMK2G	KEGG_PD_Pathway
ENSG00000164305	caspase 3 [Source:HGNC Symbol;Acc:HGNC:1504]	CASP3	KEGG_PD_Pathway
ENSG00000132906	caspase 9 [Source:HGNC Symbol;Acc:HGNC:1511]	CASP9	KEGG_PD_Pathway
ENSG00000198937	coiled-coil domain containing 167 [Source:HGNC Symbol;Acc:HGNC:21239]	CCDC167	Schormair et al., 2017, Lancet Neurology	10.1016/S1474-4422(17)30327-7
ENSG00000187094	cholecystokinin [Source:HGNC Symbol;Acc:HGNC:1569]	CCK	Wange et al., 2003, Pharmacogenetics	10.1097/00008571-200306000-00008
ENSG00000163394	cholecystokinin A receptor [Source:HGNC Symbol;Acc:HGNC:1570]	CCKAR	Wang et al., 2003, Pharmacogenetics	10.1097/00008571-200306000-00008
ENSG00000110148	cholecystokinin B receptor [Source:HGNC Symbol;Acc:HGNC:1571]	CCKBR	Wange et al., 2003, Pharmacogenetics	10.1097/00008571-200306000-00008
ENSG00000106153	coiled-coil-helix-coiled-coil-helix domain containing 2 [Source:HGNC Symbol;Acc:HGNC:21645]	CHCHD2	Zheng et al., 2020, Molecular Genetics & Genomic Medicine	https://doi.org/10.1002/mgg3.1449
ENSG00000128973	CLN6 transmembrane ER protein [Source:HGNC Symbol;Acc:HGNC:2077]	CLN6	Schormair et al., 2017, Lancet Neurology	10.1016/S1474-4422(17)30327-7
ENSG00000134852	clock circadian regulator [Source:HGNC Symbol;Acc:HGNC:2082]	CLOCK	Lou et al.,2018, Hindawi Parkinson's Disease	10.1155/2018/4670380
ENSG00000144619	contactin 4 [Source:HGNC Symbol;Acc:HGNC:2174]	CNTN4	Schormair et al., 2017, Lancet Neurology	10.1016/S1474-4422(17)30327-7
ENSG00000093010	catechol-O-methyltransferase [Source:HGNC Symbol;Acc:HGNC:2228]	COMT	Dos Santos et al., 2020,Molecular Biology Reports	10.1007/s11033-020-05956-9
ENSG00000131143	cytochrome c oxidase subunit 4I1 [Source:HGNC Symbol;Acc:HGNC:2265]	COX4I1	KEGG_PD_Pathway
ENSG00000131055	cytochrome c oxidase subunit 4I2 [Source:HGNC Symbol;Acc:HGNC:16232]	COX4I2	KEGG_PD_Pathway
ENSG00000178741	cytochrome c oxidase subunit 5A [Source:HGNC Symbol;Acc:HGNC:2267]	COX5A	KEGG_PD_Pathway
ENSG00000135940	cytochrome c oxidase subunit 5B [Source:HGNC Symbol;Acc:HGNC:2269]	COX5B	KEGG_PD_Pathway
ENSG00000111775	cytochrome c oxidase subunit 6A1 [Source:HGNC Symbol;Acc:HGNC:2277]	COX6A1	KEGG_PD_Pathway
ENSG00000156885	cytochrome c oxidase subunit 6A2 [Source:HGNC Symbol;Acc:HGNC:2279]	COX6A2	KEGG_PD_Pathway
ENSG00000126267	cytochrome c oxidase subunit 6B1 [Source:HGNC Symbol;Acc:HGNC:2280]	COX6B1	KEGG_PD_Pathway
ENSG00000160471	cytochrome c oxidase subunit 6B2 [Source:HGNC Symbol;Acc:HGNC:24380]	COX6B2	KEGG_PD_Pathway
ENSG00000164919	cytochrome c oxidase subunit 6C [Source:HGNC Symbol;Acc:HGNC:2285]	COX6C	KEGG_PD_Pathway
ENSG00000161281	cytochrome c oxidase subunit 7A1 [Source:HGNC Symbol;Acc:HGNC:2287]	COX7A1	KEGG_PD_Pathway
ENSG00000112695	cytochrome c oxidase subunit 7A2 [Source:HGNC Symbol;Acc:HGNC:2288]	COX7A2	KEGG_PD_Pathway
ENSG00000115944	cytochrome c oxidase subunit 7A2 like [Source:HGNC Symbol;Acc:HGNC:2289]	COX7A2L	KEGG_PD_Pathway
ENSG00000131174	cytochrome c oxidase subunit 7B [Source:HGNC Symbol;Acc:HGNC:2291]	COX7B	KEGG_PD_Pathway
ENSG00000170516	cytochrome c oxidase subunit 7B2 [Source:HGNC Symbol;Acc:HGNC:24381]	COX7B2	KEGG_PD_Pathway
ENSG00000127184	cytochrome c oxidase subunit 7C [Source:HGNC Symbol;Acc:HGNC:2292]	COX7C	KEGG_PD_Pathway
ENSG00000176340	cytochrome c oxidase subunit 8A [Source:HGNC Symbol;Acc:HGNC:2294]	COX8A	KEGG_PD_Pathway
ENSG00000277018	cytochrome c oxidase subunit 8C [Source:HGNC Symbol;Acc:HGNC:24382]	COX8C	KEGG_PD_Pathway
ENSG00000168993	complexin 1 [Source:HGNC Symbol;Acc:HGNC:2309]	CPLX1	Lahut et al., 2017, Disease Models & Mechanisms	10.1242/dmm.028035
ENSG00000113851	cereblon [Source:HGNC Symbol;Acc:HGNC:30185]	CRBN	Schormair et al., 2017, Lancet Neurology	10.1016/S1474-4422(17)30327-7
ENSG00000179091	cytochrome c1 [Source:HGNC Symbol;Acc:HGNC:2579]	CYC1	KEGG_PD_Pathway
ENSG00000172115	cytochrome c, somatic [Source:HGNC Symbol;Acc:HGNC:19986]	CYCS	KEGG_PD_Pathway
ENSG00000276644	dachshund family transcription factor 1 [Source:HGNC Symbol;Acc:HGNC:2663]	DACH1	Schormair et al., 2017, Lancet Neurology	10.1016/S1474-4422(17)30327-7
ENSG00000231617	death domain associated protein [Source:HGNC Symbol;Acc:HGNC:2681]	DAXX	KEGG_PD_Pathway
ENSG00000214866	doublecortin domain containing 2C [Source:HGNC Symbol;Acc:HGNC:32696]	DCDC2C	Schormair et al., 2017, Lancet Neurology	10.1016/S1474-4422(17)30327-7
ENSG00000175197	DNA damage inducible transcript 3 [Source:HGNC Symbol;Acc:HGNC:2726]	DDIT3	KEGG_PD_Pathway
ENSG00000083520	DIS3 homolog, exosome endoribonuclease and 3'-5' exoribonuclease [Source:HGNC Symbol;Acc:HGNC:20604]	DIS3	Schormair et al., 2017, Lancet Neurology	10.1016/S1474-4422(17)30327-7
ENSG00000138246	DnaJ heat shock protein family (Hsp40) member C13 [Source:HGNC Symbol;Acc:HGNC:30343]	DNAJC13	Yoshida et al., 2018, Human Molecular Genetics	10.1093/hmg/ddy003
ENSG00000116675	DnaJ heat shock protein family (Hsp40) member C6 [Source:HGNC Symbol;Acc:HGNC:15469]	DNAJC6	1. Vilageliu and Grinberg et al., 2017, Current Protein & Peptide Science 2. Lunati et al., 2018, Revue Neurologique	1. 10.2174/1389203717666160311115956 2. 10.1016/j.neurol.2018.08.004
ENSG00000134146	diphthamine biosynthesis 6 [Source:HGNC Symbol;Acc:HGNC:30543]	DPH6	Schormair et al., 2017, Lancet Neurology	10.1016/S1474-4422(17)30327-7
ENSG00000184845	dopamine receptor D1 [Source:HGNC Symbol;Acc:HGNC:3020]	DRD1	KEGG_PD_Pathway
ENSG00000149295	dopamine receptor D2 [Source:HGNC Symbol;Acc:HGNC:3023]	DRD2	KEGG_PD_Pathway
ENSG00000151577	dopamine receptor D3 [Source:HGNC Symbol;Acc:HGNC:3024]	DRD3	Dos Santos et al., 2019,The Journal of Clinical Pharmacology	10.1002/jcph.1394
ENSG00000276825	dopamine receptor D4 [Source:HGNC Symbol;Acc:HGNC:3025]	DRD4	Wan et al., 2001, Movement Disorders - not related to PD risk	10.1002/1531-8257(199903)14:2<225::aid-mds1004>3.0.co;2-7
ENSG00000169676	dopamine receptor D5 [Source:HGNC Symbol;Acc:HGNC:3026]	DRD5	Wang et al., 2001, Neuroscience Letters - NOT RELATED TO HALL.	https://doi.org/10.1016/S0304-3940(01)01971-1
ENSG00000120129	dual specificity phosphatase 1 [Source:HGNC Symbol;Acc:HGNC:3064]	DUSP1	KEGG_PD_Pathway
ENSG00000172071	eukaryotic translation initiation factor 2 alpha kinase 3 [Source:HGNC Symbol;Acc:HGNC:3255]	EIF2AK3	KEGG_PD_Pathway
ENSG00000134001	eukaryotic translation initiation factor 2 subunit alpha [Source:HGNC Symbol;Acc:HGNC:3265]	EIF2S1	KEGG_PD_Pathway
ENSG00000100225	F-box protein 7 [Source:HGNC Symbol;Acc:HGNC:13586]	FBXO7	Lunati et al., 2018, Revue Neurologique	https://doi.org/10.1016/j.neurol.2018.08.004
ENSG00000078579	fibroblast growth factor 20 [Source:HGNC Symbol;Acc:HGNC:3677]	FGF20	Rudakou et al., 2021, Brain	10.1093/brain/awaa401
ENSG00000262446	glucosylceramidase beta [Source:HGNC Symbol;Acc:HGNC:4177]	GBA	1. Vilageliu and Grinberg et al., 2017, Current Protein & Peptide Science 2. Lunati et al., 2018, Revue Neurologique	1. 10.2174/1389203717666160311115956 2. https://doi.org/10.1016/j.neurol.2018.08.004
ENSG00000131979	GTP cyclohydrolase 1 [Source:HGNC Symbol;Acc:HGNC:4193]	GCH1	Yoshino et al., 2018, Journal of Neurology	https://doi.org/10.1007/s00415-018-8930-8
ENSG00000204120	GRB10 interacting GYF protein 2 [Source:HGNC Symbol;Acc:HGNC:11960]	GIGYF2	Zheng et al., 2015, Neurological Sciences	10.1007/s10072-015-2316-9
ENSG00000124767	glyoxalase I [Source:HGNC Symbol;Acc:HGNC:4323]	GLO1	Schormair et al., 2017, Lancet Neurology	10.1016/S1474-4422(17)30327-7
ENSG00000127955	G protein subunit alpha i1 [Source:HGNC Symbol;Acc:HGNC:4384]	GNAI1	KEGG_PD_Pathway
ENSG00000114353	G protein subunit alpha i2 [Source:HGNC Symbol;Acc:HGNC:4385]	GNAI2	KEGG_PD_Pathway
ENSG00000065135	G protein subunit alpha i3 [Source:HGNC Symbol;Acc:HGNC:4387]	GNAI3	KEGG_PD_Pathway
ENSG00000141404	G protein subunit alpha L [Source:HGNC Symbol;Acc:HGNC:4388]	GNAL	KEGG_PD_Pathway
ENSG00000087460	GNAS complex locus [Source:HGNC Symbol;Acc:HGNC:4392]	GNAS	KEGG_PD_Pathway
ENSG00000170775	G protein-coupled receptor 37 [Source:HGNC Symbol;Acc:HGNC:4494]	GPR37	KEGG_PD_Pathway
ENSG00000176884	glutamate ionotropic receptor NMDA type subunit 1 [Source:HGNC Symbol;Acc:HGNC:4584]	GRIN1	Arning et al., 2005, Neurogenetics	https://doi.org/10.1007/s10048-004-0198-8
ENSG00000183454	glutamate ionotropic receptor NMDA type subunit 2A [Source:HGNC Symbol;Acc:HGNC:4585]	GRIN2A	Arning et al., 2005, Neurogenetics	https://doi.org/10.1007/s10048-004-0198-8
ENSG00000273079	glutamate ionotropic receptor NMDA type subunit 2B [Source:HGNC Symbol;Acc:HGNC:4586]	GRIN2B	Arning et al., 2005, Neurogenetics	https://doi.org/10.1007/s10048-004-0198-8
ENSG00000161509	glutamate ionotropic receptor NMDA type subunit 2C [Source:HGNC Symbol;Acc:HGNC:4587]	GRIN2C	Arning et al., 2005, Neurogenetics	https://doi.org/10.1007/s10048-004-0198-8
ENSG00000105464	glutamate ionotropic receptor NMDA type subunit 2D [Source:HGNC Symbol;Acc:HGNC:4588]	GRIN2D	Arning et al., 2005, Neurogenetics	https://doi.org/10.1007/s10048-004-0198-8
ENSG00000198785	glutamate ionotropic receptor NMDA type subunit 3A [Source:HGNC Symbol;Acc:HGNC:16767]	GRIN3A	Arning et al., 2005, Neurogenetics	https://doi.org/10.1007/s10048-004-0198-8
ENSG00000116032	glutamate ionotropic receptor NMDA type subunit 3B [Source:HGNC Symbol;Acc:HGNC:16768]	GRIN3B	Arning et al., 2005, Neurogenetics	https://doi.org/10.1007/s10048-004-0198-8
ENSG00000105723	glycogen synthase kinase 3 alpha [Source:HGNC Symbol;Acc:HGNC:4616]	GSK3A	Choi et. al, 2018, Expert Opinion	10.1080/17425255.2018.1417387
ENSG00000082701	glycogen synthase kinase 3 beta [Source:HGNC Symbol;Acc:HGNC:4617]	GSK3B	Choi et. al, 2018, Expert Opinion	10.1080/17425255.2018.1417387
ENSG00000152413	homer scaffold protein 1 [Source:HGNC Symbol;Acc:HGNC:17512]	HOMER1	Lenka et al., 2016, Journal of Neurological Sciences	10.1016/j.jns.2016.03.005
ENSG00000120094	homeobox B1 [Source:HGNC Symbol;Acc:HGNC:5111]	HOXB1	Schormair et al., 2017, Lancet Neurology	10.1016/S1474-4422(17)30327-7
ENSG00000159184	homeobox B13 [Source:HGNC Symbol;Acc:HGNC:5112]	HOXB13	Schormair et al., 2017, Lancet Neurology	10.1016/S1474-4422(17)30327-7
ENSG00000173917	homeobox B2 [Source:HGNC Symbol;Acc:HGNC:5113]	HOXB2	Schormair et al., 2017, Lancet Neurology	10.1016/S1474-4422(17)30327-7
ENSG00000120093	homeobox B3 [Source:HGNC Symbol;Acc:HGNC:5114]	HOXB3	Schormair et al., 2017, Lancet Neurology	10.1016/S1474-4422(17)30327-7
ENSG00000182742	homeobox B4 [Source:HGNC Symbol;Acc:HGNC:5115]	HOXB4	Schormair et al., 2017, Lancet Neurology	10.1016/S1474-4422(17)30327-7
ENSG00000120075	homeobox B5 [Source:HGNC Symbol;Acc:HGNC:5116]	HOXB5	Schormair et al., 2017, Lancet Neurology	10.1016/S1474-4422(17)30327-7
ENSG00000108511	homeobox B6 [Source:HGNC Symbol;Acc:HGNC:5117]	HOXB6	Schormair et al., 2017, Lancet Neurology	10.1016/S1474-4422(17)30327-7
ENSG00000260027	homeobox B7 [Source:HGNC Symbol;Acc:HGNC:5118]	HOXB7	Schormair et al., 2017, Lancet Neurology	10.1016/S1474-4422(17)30327-7
ENSG00000120068	homeobox B8 [Source:HGNC Symbol;Acc:HGNC:5119]	HOXB8	Schormair et al., 2017, Lancet Neurology	10.1016/S1474-4422(17)30327-7
ENSG00000170689	homeobox B9 [Source:HGNC Symbol;Acc:HGNC:5120]	HOXB9	Schormair et al., 2017, Lancet Neurology	10.1016/S1474-4422(17)30327-7
ENSG00000044574	heat shock protein family A (Hsp70) member 5 [Source:HGNC Symbol;Acc:HGNC:5238]	HSPA5	KEGG_PD_Pathway
ENSG00000115317	HtrA serine peptidase 2 [Source:HGNC Symbol;Acc:HGNC:14348]	HTRA2	KEGG_PD_Pathway
ENSG00000150995	inositol 1,4,5-trisphosphate receptor type 1 [Source:HGNC Symbol;Acc:HGNC:6180]	ITPR1	KEGG_PD_Pathway
ENSG00000123104	inositol 1,4,5-trisphosphate receptor type 2 [Source:HGNC Symbol;Acc:HGNC:6181]	ITPR2	KEGG_PD_Pathway
ENSG00000096433	inositol 1,4,5-trisphosphate receptor type 3 [Source:HGNC Symbol;Acc:HGNC:6182]	ITPR3	KEGG_PD_Pathway
ENSG00000155980	kinesin family member 5A [Source:HGNC Symbol;Acc:HGNC:6323]	KIF5A	KEGG_PD_Pathway
ENSG00000170759	kinesin family member 5B [Source:HGNC Symbol;Acc:HGNC:6324]	KIF5B	KEGG_PD_Pathway
ENSG00000276734	kinesin family member 5C [Source:HGNC Symbol;Acc:HGNC:6325]	KIF5C	KEGG_PD_Pathway
ENSG00000126214	kinesin light chain 1 [Source:HGNC Symbol;Acc:HGNC:6387]	KLC1	KEGG_PD_Pathway
ENSG00000174996	kinesin light chain 2 [Source:HGNC Symbol;Acc:HGNC:20716]	KLC2	KEGG_PD_Pathway
ENSG00000104892	kinesin light chain 3 [Source:HGNC Symbol;Acc:HGNC:20717]	KLC3	KEGG_PD_Pathway
ENSG00000137171	kinesin light chain 4 [Source:HGNC Symbol;Acc:HGNC:21624]	KLC4	KEGG_PD_Pathway
ENSG00000188906	leucine rich repeat kinase 2 [Source:HGNC Symbol;Acc:HGNC:18618]	LRRK2	KEGG_PD_Pathway
ENSG00000175928	leucine rich repeat neuronal 1 [Source:HGNC Symbol;Acc:HGNC:20980]	LRRN1	Schormair et al., 2017, Lancet Neurology	10.1016/S1474-4422(17)30327-7
ENSG00000189221	monoamine oxidase A [Source:HGNC Symbol;Acc:HGNC:6833]	MAOA	KEGG_PD_Pathway
ENSG00000069535	monoamine oxidase B [Source:HGNC Symbol;Acc:HGNC:6834]	MAOB	KEGG_PD_Pathway
ENSG00000137764	mitogen-activated protein kinase kinase 5 [Source:HGNC Symbol;Acc:HGNC:6845]	MAP2K5	Schormair et al., 2017, Lancet Neurology	10.1016/S1474-4422(17)30327-7
ENSG00000197442	mitogen-activated protein kinase kinase kinase 5 [Source:HGNC Symbol;Acc:HGNC:6857]	MAP3K5	KEGG_PD_Pathway
ENSG00000109339	mitogen-activated protein kinase 10 [Source:HGNC Symbol;Acc:HGNC:6872]	MAPK10	KEGG_PD_Pathway
ENSG00000107643	mitogen-activated protein kinase 8 [Source:HGNC Symbol;Acc:HGNC:6881]	MAPK8	KEGG_PD_Pathway
ENSG00000050748	mitogen-activated protein kinase 9 [Source:HGNC Symbol;Acc:HGNC:6886]	MAPK9	KEGG_PD_Pathway
ENSG00000276155	microtubule associated protein tau [Source:HGNC Symbol;Acc:HGNC:6893]	MAPT	KEGG_PD_Pathway
ENSG00000156026	mitochondrial calcium uniporter [Source:HGNC Symbol;Acc:HGNC:23526]	MCU	KEGG_PD_Pathway
ENSG00000112139	MAM domain containing glycosylphosphatidylinositol anchor 1 [Source:HGNC Symbol;Acc:HGNC:19267]	MDGA1	Schormair et al., 2017, Lancet Neurology	10.1016/S1474-4422(17)30327-7
ENSG00000143995	Meis homeobox 1 [Source:HGNC Symbol;Acc:HGNC:7000]	MEIS1	Schormair et al., 2017, Lancet Neurology	10.1016/S1474-4422(17)30327-7
ENSG00000134138	Meis homeobox 2 [Source:HGNC Symbol;Acc:HGNC:7001]	MEIS2	Schormair et al., 2017, Lancet Neurology	10.1016/S1474-4422(17)30327-7
ENSG00000171109	mitofusin 1 [Source:HGNC Symbol;Acc:HGNC:18262]	MFN1	KEGG_PD_Pathway
ENSG00000116688	mitofusin 2 [Source:HGNC Symbol;Acc:HGNC:16877]	MFN2	KEGG_PD_Pathway
ENSG00000276876	myelin transcription factor 1 [Source:HGNC Symbol;Acc:HGNC:7622]	MYT1	Schormair et al., 2017, Lancet Neurology	10.1016/S1474-4422(17)30327-7
ENSG00000125356	NADH:ubiquinone oxidoreductase subunit A1 [Source:HGNC Symbol;Acc:HGNC:7683]	NDUFA1	KEGG_PD_Pathway
ENSG00000130414	NADH:ubiquinone oxidoreductase subunit A10 [Source:HGNC Symbol;Acc:HGNC:7684]	NDUFA10	KEGG_PD_Pathway
ENSG00000174886	NADH:ubiquinone oxidoreductase subunit A11 [Source:HGNC Symbol;Acc:HGNC:20371]	NDUFA11	KEGG_PD_Pathway
ENSG00000184752	NADH:ubiquinone oxidoreductase subunit A12 [Source:HGNC Symbol;Acc:HGNC:23987]	NDUFA12	KEGG_PD_Pathway
ENSG00000186010	NADH:ubiquinone oxidoreductase subunit A13 [Source:HGNC Symbol;Acc:HGNC:17194]	NDUFA13	KEGG_PD_Pathway
ENSG00000131495	NADH:ubiquinone oxidoreductase subunit A2 [Source:HGNC Symbol;Acc:HGNC:7685]	NDUFA2	KEGG_PD_Pathway
ENSG00000273642	NADH:ubiquinone oxidoreductase subunit A3 [Source:HGNC Symbol;Acc:HGNC:7686]	NDUFA3	KEGG_PD_Pathway
ENSG00000189043	NDUFA4 mitochondrial complex associated [Source:HGNC Symbol;Acc:HGNC:7687]	NDUFA4	KEGG_PD_Pathway
ENSG00000185633	NDUFA4 mitochondrial complex associated like 2 [Source:HGNC Symbol;Acc:HGNC:29836]	NDUFA4L2	KEGG_PD_Pathway
ENSG00000128609	NADH:ubiquinone oxidoreductase subunit A5 [Source:HGNC Symbol;Acc:HGNC:7688]	NDUFA5	KEGG_PD_Pathway
ENSG00000277365	NADH:ubiquinone oxidoreductase subunit A6 [Source:HGNC Symbol;Acc:HGNC:7690]	NDUFA6	KEGG_PD_Pathway
ENSG00000267855	NADH:ubiquinone oxidoreductase subunit A7 [Source:HGNC Symbol;Acc:HGNC:7691]	NDUFA7	KEGG_PD_Pathway
ENSG00000119421	NADH:ubiquinone oxidoreductase subunit A8 [Source:HGNC Symbol;Acc:HGNC:7692]	NDUFA8	KEGG_PD_Pathway
ENSG00000139180	NADH:ubiquinone oxidoreductase subunit A9 [Source:HGNC Symbol;Acc:HGNC:7693]	NDUFA9	KEGG_PD_Pathway
ENSG00000004779	NADH:ubiquinone oxidoreductase subunit AB1 [Source:HGNC Symbol;Acc:HGNC:7694]	NDUFAB1	KEGG_PD_Pathway
ENSG00000183648	NADH:ubiquinone oxidoreductase subunit B1 [Source:HGNC Symbol;Acc:HGNC:7695]	NDUFB1	KEGG_PD_Pathway
ENSG00000140990	NADH:ubiquinone oxidoreductase subunit B10 [Source:HGNC Symbol;Acc:HGNC:7696]	NDUFB10	KEGG_PD_Pathway
ENSG00000147123	NADH:ubiquinone oxidoreductase subunit B11 [Source:HGNC Symbol;Acc:HGNC:20372]	NDUFB11	KEGG_PD_Pathway
ENSG00000090266	NADH:ubiquinone oxidoreductase subunit B2 [Source:HGNC Symbol;Acc:HGNC:7697]	NDUFB2	KEGG_PD_Pathway
ENSG00000119013	NADH:ubiquinone oxidoreductase subunit B3 [Source:HGNC Symbol;Acc:HGNC:7698]	NDUFB3	KEGG_PD_Pathway
ENSG00000065518	NADH:ubiquinone oxidoreductase subunit B4 [Source:HGNC Symbol;Acc:HGNC:7699]	NDUFB4	KEGG_PD_Pathway
ENSG00000136521	NADH:ubiquinone oxidoreductase subunit B5 [Source:HGNC Symbol;Acc:HGNC:7700]	NDUFB5	KEGG_PD_Pathway
ENSG00000165264	NADH:ubiquinone oxidoreductase subunit B6 [Source:HGNC Symbol;Acc:HGNC:7701]	NDUFB6	KEGG_PD_Pathway
ENSG00000099795	NADH:ubiquinone oxidoreductase subunit B7 [Source:HGNC Symbol;Acc:HGNC:7702]	NDUFB7	KEGG_PD_Pathway
ENSG00000166136	NADH:ubiquinone oxidoreductase subunit B8 [Source:HGNC Symbol;Acc:HGNC:7703]	NDUFB8	KEGG_PD_Pathway
ENSG00000147684	NADH:ubiquinone oxidoreductase subunit B9 [Source:HGNC Symbol;Acc:HGNC:7704]	NDUFB9	KEGG_PD_Pathway
ENSG00000109390	NADH:ubiquinone oxidoreductase subunit C1 [Source:HGNC Symbol;Acc:HGNC:7705]	NDUFC1	KEGG_PD_Pathway
ENSG00000151366	NADH:ubiquinone oxidoreductase subunit C2 [Source:HGNC Symbol;Acc:HGNC:7706]	NDUFC2	KEGG_PD_Pathway
ENSG00000259112	NDUFC2-KCTD14 readthrough [Source:HGNC Symbol;Acc:HGNC:42956]	NDUFC2-KCTD14	KEGG_PD_Pathway
ENSG00000283447	NADH:ubiquinone oxidoreductase core subunit S1 [Source:HGNC Symbol;Acc:HGNC:7707]	NDUFS1	KEGG_PD_Pathway
ENSG00000158864	NADH:ubiquinone oxidoreductase core subunit S2 [Source:HGNC Symbol;Acc:HGNC:7708]	NDUFS2	KEGG_PD_Pathway
ENSG00000285387	NADH:ubiquinone oxidoreductase core subunit S3 [Source:HGNC Symbol;Acc:HGNC:7710]	NDUFS3	KEGG_PD_Pathway
ENSG00000164258	NADH:ubiquinone oxidoreductase subunit S4 [Source:HGNC Symbol;Acc:HGNC:7711]	NDUFS4	KEGG_PD_Pathway
ENSG00000168653	NADH:ubiquinone oxidoreductase subunit S5 [Source:HGNC Symbol;Acc:HGNC:7712]	NDUFS5	KEGG_PD_Pathway
ENSG00000145494	NADH:ubiquinone oxidoreductase subunit S6 [Source:HGNC Symbol;Acc:HGNC:7713]	NDUFS6	KEGG_PD_Pathway
ENSG00000115286	NADH:ubiquinone oxidoreductase core subunit S7 [Source:HGNC Symbol;Acc:HGNC:7714]	NDUFS7	KEGG_PD_Pathway
ENSG00000110717	NADH:ubiquinone oxidoreductase core subunit S8 [Source:HGNC Symbol;Acc:HGNC:7715]	NDUFS8	KEGG_PD_Pathway
ENSG00000167792	NADH:ubiquinone oxidoreductase core subunit V1 [Source:HGNC Symbol;Acc:HGNC:7716]	NDUFV1	KEGG_PD_Pathway
ENSG00000178127	NADH:ubiquinone oxidoreductase core subunit V2 [Source:HGNC Symbol;Acc:HGNC:7717]	NDUFV2	KEGG_PD_Pathway
ENSG00000160194	NADH:ubiquinone oxidoreductase subunit V3 [Source:HGNC Symbol;Acc:HGNC:7719]	NDUFV3	KEGG_PD_Pathway
ENSG00000116044	nuclear factor, erythroid 2 like 2 [Source:HGNC Symbol;Acc:HGNC:7782]	NFE2L2	KEGG_PD_Pathway
ENSG00000162631	netrin G1 [Source:HGNC Symbol;Acc:HGNC:23319]	NTNG1	Schormair et al., 2017, Lancet Neurology	10.1016/S1474-4422(17)30327-7
ENSG00000112038	opioid receptor mu 1 [Source:HGNC Symbol;Acc:HGNC:8156]	OPRM1	Shih et al., 2013, Neurology Asia	http://neurology-asia.org/articles/neuroasia-2013-18(3)-279.pdf
ENSG00000116288	Parkinsonism associated deglycase [Source:HGNC Symbol;Acc:HGNC:16369]	PARK7	KEGG_PD_Pathway
ENSG00000158828	PTEN induced kinase 1 [Source:HGNC Symbol;Acc:HGNC:14581]	PINK1	KEGG_PD_Pathway
ENSG00000144283	plakophilin 4 [Source:HGNC Symbol;Acc:HGNC:9026]	PKP4	Schormair et al., 2017, Lancet Neurology	10.1016/S1474-4422(17)30327-7
ENSG00000184381	phospholipase A2 group VI [Source:HGNC Symbol;Acc:HGNC:9039]	PLA2G6	1. Vilageliu and Grinberg et al., 2017, Current Protein & Peptide Science 2. Lunati et al., 2018, Revue Neurologique	1. 10.2174/1389203717666160311115956 2. https://doi.org/10.1016/j.neurol.2018.08.004
ENSG00000124181	phospholipase C gamma 1 [Source:HGNC Symbol;Acc:HGNC:9065]	PLCG1	KEGG_PD_Pathway
ENSG00000162877	peptidase M20 domain containing 1 [Source:HGNC Symbol;Acc:HGNC:26518]	PM20D1	Rudakou et al., 2021, Brain	10.1093/brain/awaa401
ENSG00000128567	podocalyxin like [Source:HGNC Symbol;Acc:HGNC:9171]	PODXL	1. Vilageliu and Grinberg et al., 2017, Current Protein & Peptide Science 2. Lunati et al., 2018, Revue Neurologique	1. 10.2174/1389203717666160311115956 2. 10.1016/j.neurol.2018.08.004
ENSG00000108179	peptidylprolyl isomerase F [Source:HGNC Symbol;Acc:HGNC:9259]	PPIF	KEGG_PD_Pathway
ENSG00000159182	PRAC1 small nuclear protein [Source:HGNC Symbol;Acc:HGNC:30591]	PRAC1	Schormair et al., 2017, Lancet Neurology	10.1016/S1474-4422(17)30327-7
ENSG00000288516	protein kinase cAMP-activated catalytic subunit alpha [Source:HGNC Symbol;Acc:HGNC:9380]	PRKACA	KEGG_PD_Pathway
ENSG00000142875	protein kinase cAMP-activated catalytic subunit beta [Source:HGNC Symbol;Acc:HGNC:9381]	PRKACB	KEGG_PD_Pathway
ENSG00000165059	protein kinase cAMP-activated catalytic subunit gamma [Source:HGNC Symbol;Acc:HGNC:9382]	PRKACG	KEGG_PD_Pathway
ENSG00000185345	parkin RBR E3 ubiquitin protein ligase [Source:HGNC Symbol;Acc:HGNC:8607]	PRKN	KEGG_PD_Pathway
ENSG00000198890	protein arginine methyltransferase 6 [Source:HGNC Symbol;Acc:HGNC:18241]	PRMT6	Schormair et al., 2017, Lancet Neurology	10.1016/S1474-4422(17)30327-7
ENSG00000129084	proteasome 20S subunit alpha 1 [Source:HGNC Symbol;Acc:HGNC:9530]	PSMA1	KEGG_PD_Pathway
ENSG00000106588	proteasome 20S subunit alpha 2 [Source:HGNC Symbol;Acc:HGNC:9531]	PSMA2	KEGG_PD_Pathway
ENSG00000100567	proteasome 20S subunit alpha 3 [Source:HGNC Symbol;Acc:HGNC:9532]	PSMA3	KEGG_PD_Pathway
ENSG00000041357	proteasome 20S subunit alpha 4 [Source:HGNC Symbol;Acc:HGNC:9533]	PSMA4	KEGG_PD_Pathway
ENSG00000143106	proteasome 20S subunit alpha 5 [Source:HGNC Symbol;Acc:HGNC:9534]	PSMA5	KEGG_PD_Pathway
ENSG00000100902	proteasome 20S subunit alpha 6 [Source:HGNC Symbol;Acc:HGNC:9535]	PSMA6	KEGG_PD_Pathway
ENSG00000101182	proteasome 20S subunit alpha 7 [Source:HGNC Symbol;Acc:HGNC:9536]	PSMA7	KEGG_PD_Pathway
ENSG00000154611	proteasome 20S subunit alpha 8 [Source:HGNC Symbol;Acc:HGNC:22985]	PSMA8	KEGG_PD_Pathway
ENSG00000281184	proteasome 20S subunit beta 1 [Source:HGNC Symbol;Acc:HGNC:9537]	PSMB1	KEGG_PD_Pathway
ENSG00000126067	proteasome 20S subunit beta 2 [Source:HGNC Symbol;Acc:HGNC:9539]	PSMB2	KEGG_PD_Pathway
ENSG00000275903	proteasome 20S subunit beta 3 [Source:HGNC Symbol;Acc:HGNC:9540]	PSMB3	KEGG_PD_Pathway
ENSG00000159377	proteasome 20S subunit beta 4 [Source:HGNC Symbol;Acc:HGNC:9541]	PSMB4	KEGG_PD_Pathway
ENSG00000100804	proteasome 20S subunit beta 5 [Source:HGNC Symbol;Acc:HGNC:9542]	PSMB5	KEGG_PD_Pathway
ENSG00000142507	proteasome 20S subunit beta 6 [Source:HGNC Symbol;Acc:HGNC:9543]	PSMB6	KEGG_PD_Pathway
ENSG00000136930	proteasome 20S subunit beta 7 [Source:HGNC Symbol;Acc:HGNC:9544]	PSMB7	KEGG_PD_Pathway
ENSG00000100764	proteasome 26S subunit, ATPase 1 [Source:HGNC Symbol;Acc:HGNC:9547]	PSMC1	KEGG_PD_Pathway
ENSG00000161057	proteasome 26S subunit, ATPase 2 [Source:HGNC Symbol;Acc:HGNC:9548]	PSMC2	KEGG_PD_Pathway
ENSG00000165916	proteasome 26S subunit, ATPase 3 [Source:HGNC Symbol;Acc:HGNC:9549]	PSMC3	KEGG_PD_Pathway
ENSG00000281221	proteasome 26S subunit, ATPase 4 [Source:HGNC Symbol;Acc:HGNC:9551]	PSMC4	KEGG_PD_Pathway
ENSG00000087191	proteasome 26S subunit, ATPase 5 [Source:HGNC Symbol;Acc:HGNC:9552]	PSMC5	KEGG_PD_Pathway
ENSG00000100519	proteasome 26S subunit, ATPase 6 [Source:HGNC Symbol;Acc:HGNC:9553]	PSMC6	KEGG_PD_Pathway
ENSG00000173692	proteasome 26S subunit, non-ATPase 1 [Source:HGNC Symbol;Acc:HGNC:9554]	PSMD1	KEGG_PD_Pathway
ENSG00000108671	proteasome 26S subunit, non-ATPase 11 [Source:HGNC Symbol;Acc:HGNC:9556]	PSMD11	KEGG_PD_Pathway
ENSG00000197170	proteasome 26S subunit, non-ATPase 12 [Source:HGNC Symbol;Acc:HGNC:9557]	PSMD12	KEGG_PD_Pathway
ENSG00000185627	proteasome 26S subunit, non-ATPase 13 [Source:HGNC Symbol;Acc:HGNC:9558]	PSMD13	KEGG_PD_Pathway
ENSG00000115233	proteasome 26S subunit, non-ATPase 14 [Source:HGNC Symbol;Acc:HGNC:16889]	PSMD14	KEGG_PD_Pathway
ENSG00000175166	proteasome 26S subunit, non-ATPase 2 [Source:HGNC Symbol;Acc:HGNC:9559]	PSMD2	KEGG_PD_Pathway
ENSG00000108344	proteasome 26S subunit, non-ATPase 3 [Source:HGNC Symbol;Acc:HGNC:9560]	PSMD3	KEGG_PD_Pathway
ENSG00000159352	proteasome 26S subunit, non-ATPase 4 [Source:HGNC Symbol;Acc:HGNC:9561]	PSMD4	KEGG_PD_Pathway
ENSG00000163636	proteasome 26S subunit, non-ATPase 6 [Source:HGNC Symbol;Acc:HGNC:9564]	PSMD6	KEGG_PD_Pathway
ENSG00000103035	proteasome 26S subunit, non-ATPase 7 [Source:HGNC Symbol;Acc:HGNC:9565]	PSMD7	KEGG_PD_Pathway
ENSG00000099341	proteasome 26S subunit, non-ATPase 8 [Source:HGNC Symbol;Acc:HGNC:9566]	PSMD8	KEGG_PD_Pathway
ENSG00000110801	proteasome 26S subunit, non-ATPase 9 [Source:HGNC Symbol;Acc:HGNC:9567]	PSMD9	KEGG_PD_Pathway
ENSG00000282932	protein tyrosine phosphatase receptor type D [Source:HGNC Symbol;Acc:HGNC:9668]	PTPRD	Schormair et al., 2017, Lancet Neurology	10.1016/S1474-4422(17)30327-7
ENSG00000184924	peptidyl-tRNA hydrolase domain containing 1 [Source:HGNC Symbol;Acc:HGNC:33782]	PTRHD1	1. Vilageliu and Grinberg et al., 2017, Current Protein & Peptide Science 2. Lunati et al., 2018, Revue Neurologique	1. 10.2174/1389203717666160311115956 2. 10.1016/j.neurol.2018.08.004
ENSG00000166405	RIC3 acetylcholine receptor chaperone [Source:HGNC Symbol;Acc:HGNC:30338]	RIC3	Zheng et al., 2020, Molecular Genetics & Genomic Medicine	https://doi.org/10.1002/mgg3.1449
ENSG00000112130	ring finger protein 8 [Source:HGNC Symbol;Acc:HGNC:10071]	RNF8	Schormair et al., 2017, Lancet Neurology	10.1016/S1474-4422(17)30327-7
ENSG00000143947	ribosomal protein S27a [Source:HGNC Symbol;Acc:HGNC:10417]	RPS27A	KEGG_PD_Pathway
ENSG00000198838	ryanodine receptor 3 [Source:HGNC Symbol;Acc:HGNC:10485]	RYR3	KEGG_PD_Pathway
ENSG00000073578	succinate dehydrogenase complex flavoprotein subunit A [Source:HGNC Symbol;Acc:HGNC:10680]	SDHA	KEGG_PD_Pathway
ENSG00000117118	succinate dehydrogenase complex iron sulfur subunit B [Source:HGNC Symbol;Acc:HGNC:10681]	SDHB	KEGG_PD_Pathway
ENSG00000143252	succinate dehydrogenase complex subunit C [Source:HGNC Symbol;Acc:HGNC:10682]	SDHC	KEGG_PD_Pathway
ENSG00000204370	succinate dehydrogenase complex subunit D [Source:HGNC Symbol;Acc:HGNC:10683]	SDHD	KEGG_PD_Pathway
ENSG00000127922	SEM1 26S proteasome complex subunit [Source:HGNC Symbol;Acc:HGNC:10845]	SEM1	KEGG_PD_Pathway
ENSG00000137872	semaphorin 6D [Source:HGNC Symbol;Acc:HGNC:16770]	SEMA6D	Schormair et al., 2017, Lancet Neurology	10.1016/S1474-4422(17)30327-7
ENSG00000184702	septin 5 [Source:HGNC Symbol;Acc:HGNC:9164]	SEPTIN5	KEGG_PD_Pathway
ENSG00000152217	SET binding protein 1 [Source:HGNC Symbol;Acc:HGNC:15573]	SETBP1	Schormair et al., 2017, Lancet Neurology	10.1016/S1474-4422(17)30327-7
ENSG00000188779	SKI family transcriptional corepressor 1 [Source:HGNC Symbol;Acc:HGNC:21326]	SKOR1	Schormair et al., 2017, Lancet Neurology	10.1016/S1474-4422(17)30327-7
ENSG00000036565	solute carrier family 18 member A1 [Source:HGNC Symbol;Acc:HGNC:10934]	SLC18A1	KEGG_PD_Pathway
ENSG00000165646	solute carrier family 18 member A2 [Source:HGNC Symbol;Acc:HGNC:10935]	SLC18A2	KEGG_PD_Pathway
ENSG00000151475	solute carrier family 25 member 31 [Source:HGNC Symbol;Acc:HGNC:25319]	SLC25A31	KEGG_PD_Pathway
ENSG00000151729	solute carrier family 25 member 4 [Source:HGNC Symbol;Acc:HGNC:10990]	SLC25A4	KEGG_PD_Pathway
ENSG00000005022	solute carrier family 25 member 5 [Source:HGNC Symbol;Acc:HGNC:10991]	SLC25A5	KEGG_PD_Pathway
ENSG00000169100	solute carrier family 25 member 6 [Source:HGNC Symbol;Acc:HGNC:10992]	SLC25A6	KEGG_PD_Pathway
ENSG00000276996	solute carrier family 6 member 3 [Source:HGNC Symbol;Acc:HGNC:11049]	SLC6A3	KEGG_PD_Pathway
ENSG00000166949	SMAD family member 3 [Source:HGNC Symbol;Acc:HGNC:6769]	SMAD3	Schormair et al., 2017, Lancet Neurology	10.1016/S1474-4422(17)30327-7
ENSG00000166311	sphingomyelin phosphodiesterase 1 [Source:HGNC Symbol;Acc:HGNC:11120]	SMPD1	1. Vilageliu and Grinberg et al., 2017, Current Protein & Peptide Science 2. Lunati et al., 2018, Revue Neurologique	1. 10.2174/1389203717666160311115956 2. 10.1016/j.neurol.2018.08.004
ENSG00000145335	synuclein alpha [Source:HGNC Symbol;Acc:HGNC:11138]	SNCA	KEGG_PD_Pathway
ENSG00000064692	synuclein alpha interacting protein [Source:HGNC Symbol;Acc:HGNC:11139]	SNCAIP	KEGG_PD_Pathway
ENSG00000127954	STEAP4 metalloreductase [Source:HGNC Symbol;Acc:HGNC:21923]	STEAP4	Schormair et al., 2017, Lancet Neurology	10.1016/S1474-4422(17)30327-7
ENSG00000159082	synaptojanin 1 [Source:HGNC Symbol;Acc:HGNC:11503]	SYNJ1	1. Vilageliu and Grinberg et al., 2017, Current Protein & Peptide Science 2. Lunati et al., 2018, Revue Neurologique	1. 10.2174/1389203717666160311115956 2. https://doi.org/10.1016/j.neurol.2018.08.004
ENSG00000132718	synaptotagmin 11 [Source:HGNC Symbol;Acc:HGNC:19239]	SYT11	Rudakou et al., 2021, Brain	10.1093/brain/awaa401
ENSG00000115183	tetratricopeptide repeat, ankyrin repeat and coiled-coil containing 1 [Source:HGNC Symbol;Acc:HGNC:29364]	TANC1	Schormair et al., 2017, Lancet Neurology	10.1016/S1474-4422(17)30327-7
ENSG00000167074	TEF transcription factor, PAR bZIP family member [Source:HGNC Symbol;Acc:HGNC:11722]	TEF	Hua et al., 2012, Sleep Medicine	10.1016/j.sleep.2011.06.023
ENSG00000180176	tyrosine hydroxylase [Source:HGNC Symbol;Acc:HGNC:11782]	TH	KEGG_PD_Pathway
ENSG00000089063	transmembrane protein 230 [Source:HGNC Symbol;Acc:HGNC:15876]	TMEM230	Zheng et al., 2020, Molecular Genetics & Genomic Medicine	https://doi.org/10.1002/mgg3.1449
ENSG00000103460	TOX high mobility group box family member 3 [Source:HGNC Symbol;Acc:HGNC:11972]	TOX3	Schormair et al., 2017, Lancet Neurology	10.1016/S1474-4422(17)30327-7
ENSG00000141510	tumor protein p53 [Source:HGNC Symbol;Acc:HGNC:11998]	TP53	KEGG_PD_Pathway
ENSG00000126602	TNF receptor associated protein 1 [Source:HGNC Symbol;Acc:HGNC:16264]	TRAP1	KEGG_PD_Pathway
ENSG00000167552	tubulin alpha 1a [Source:HGNC Symbol;Acc:HGNC:20766]	TUBA1A	KEGG_PD_Pathway
ENSG00000123416	tubulin alpha 1b [Source:HGNC Symbol;Acc:HGNC:18809]	TUBA1B	KEGG_PD_Pathway
ENSG00000167553	tubulin alpha 1c [Source:HGNC Symbol;Acc:HGNC:20768]	TUBA1C	KEGG_PD_Pathway
ENSG00000198033	tubulin alpha 3c [Source:HGNC Symbol;Acc:HGNC:12408]	TUBA3C	KEGG_PD_Pathway
ENSG00000075886	tubulin alpha 3d [Source:HGNC Symbol;Acc:HGNC:24071]	TUBA3D	KEGG_PD_Pathway
ENSG00000152086	tubulin alpha 3e [Source:HGNC Symbol;Acc:HGNC:20765]	TUBA3E	KEGG_PD_Pathway
ENSG00000127824	tubulin alpha 4a [Source:HGNC Symbol;Acc:HGNC:12407]	TUBA4A	KEGG_PD_Pathway
ENSG00000183785	tubulin alpha 8 [Source:HGNC Symbol;Acc:HGNC:12410]	TUBA8	KEGG_PD_Pathway
ENSG00000178462	tubulin alpha like 3 [Source:HGNC Symbol;Acc:HGNC:23534]	TUBAL3	KEGG_PD_Pathway
ENSG00000235067	tubulin beta class I [Source:HGNC Symbol;Acc:HGNC:20778]	TUBB	KEGG_PD_Pathway
ENSG00000101162	tubulin beta 1 class VI [Source:HGNC Symbol;Acc:HGNC:16257]	TUBB1	KEGG_PD_Pathway
ENSG00000137267	tubulin beta 2A class IIa [Source:HGNC Symbol;Acc:HGNC:12412]	TUBB2A	KEGG_PD_Pathway
ENSG00000137285	tubulin beta 2B class IIb [Source:HGNC Symbol;Acc:HGNC:30829]	TUBB2B	KEGG_PD_Pathway
ENSG00000258947	tubulin beta 3 class III [Source:HGNC Symbol;Acc:HGNC:20772]	TUBB3	KEGG_PD_Pathway
ENSG00000104833	tubulin beta 4A class IVa [Source:HGNC Symbol;Acc:HGNC:20774]	TUBB4A	KEGG_PD_Pathway
ENSG00000188229	tubulin beta 4B class IVb [Source:HGNC Symbol;Acc:HGNC:20771]	TUBB4B	KEGG_PD_Pathway
ENSG00000176014	tubulin beta 6 class V [Source:HGNC Symbol;Acc:HGNC:20776]	TUBB6	KEGG_PD_Pathway
ENSG00000261456	tubulin beta 8 class VIII [Source:HGNC Symbol;Acc:HGNC:20773]	TUBB8	KEGG_PD_Pathway
ENSG00000136810	thioredoxin [Source:HGNC Symbol;Acc:HGNC:12435]	TXN	KEGG_PD_Pathway
ENSG00000100348	thioredoxin 2 [Source:HGNC Symbol;Acc:HGNC:17772]	TXN2	KEGG_PD_Pathway
ENSG00000130985	ubiquitin like modifier activating enzyme 1 [Source:HGNC Symbol;Acc:HGNC:12469]	UBA1	KEGG_PD_Pathway
ENSG00000221983	ubiquitin A-52 residue ribosomal protein fusion product 1 [Source:HGNC Symbol;Acc:HGNC:12458]	UBA52	KEGG_PD_Pathway
ENSG00000182179	ubiquitin like modifier activating enzyme 7 [Source:HGNC Symbol;Acc:HGNC:12471]	UBA7	KEGG_PD_Pathway
ENSG00000170315	ubiquitin B [Source:HGNC Symbol;Acc:HGNC:12463]	UBB	KEGG_PD_Pathway
ENSG00000150991	ubiquitin C [Source:HGNC Symbol;Acc:HGNC:12468]	UBC	KEGG_PD_Pathway
ENSG00000132388	ubiquitin conjugating enzyme E2 G1 [Source:HGNC Symbol;Acc:HGNC:12482]	UBE2G1	KEGG_PD_Pathway
ENSG00000184787	ubiquitin conjugating enzyme E2 G2 [Source:HGNC Symbol;Acc:HGNC:12483]	UBE2G2	KEGG_PD_Pathway
ENSG00000198833	ubiquitin conjugating enzyme E2 J1 [Source:HGNC Symbol;Acc:HGNC:17598]	UBE2J1	KEGG_PD_Pathway
ENSG00000160087	ubiquitin conjugating enzyme E2 J2 [Source:HGNC Symbol;Acc:HGNC:19268]	UBE2J2	KEGG_PD_Pathway
ENSG00000185651	ubiquitin conjugating enzyme E2 L3 [Source:HGNC Symbol;Acc:HGNC:12488]	UBE2L3	KEGG_PD_Pathway
ENSG00000156587	ubiquitin conjugating enzyme E2 L6 [Source:HGNC Symbol;Acc:HGNC:12490]	UBE2L6	KEGG_PD_Pathway
ENSG00000154277	ubiquitin C-terminal hydrolase L1 [Source:HGNC Symbol;Acc:HGNC:12513]	UCHL1	KEGG_PD_Pathway
ENSG00000184076	ubiquinol-cytochrome c reductase, complex III subunit X [Source:HGNC Symbol;Acc:HGNC:30863]	UQCR10	KEGG_PD_Pathway
ENSG00000127540	ubiquinol-cytochrome c reductase, complex III subunit XI [Source:HGNC Symbol;Acc:HGNC:30862]	UQCR11	KEGG_PD_Pathway
ENSG00000156467	ubiquinol-cytochrome c reductase binding protein [Source:HGNC Symbol;Acc:HGNC:12582]	UQCRB	KEGG_PD_Pathway
ENSG00000010256	ubiquinol-cytochrome c reductase core protein 1 [Source:HGNC Symbol;Acc:HGNC:12585]	UQCRC1	KEGG_PD_Pathway
ENSG00000140740	ubiquinol-cytochrome c reductase core protein 2 [Source:HGNC Symbol;Acc:HGNC:12586]	UQCRC2	KEGG_PD_Pathway
ENSG00000169021	ubiquinol-cytochrome c reductase, Rieske iron-sulfur polypeptide 1 [Source:HGNC Symbol;Acc:HGNC:12587]	UQCRFS1	KEGG_PD_Pathway
ENSG00000173660	ubiquinol-cytochrome c reductase hinge protein [Source:HGNC Symbol;Acc:HGNC:12590]	UQCRH	KEGG_PD_Pathway
ENSG00000233954	ubiquinol-cytochrome c reductase hinge protein like [Source:HGNC Symbol;Acc:HGNC:51714]	UQCRHL	KEGG_PD_Pathway
ENSG00000164405	ubiquinol-cytochrome c reductase complex III subunit VII [Source:HGNC Symbol;Acc:HGNC:29594]	UQCRQ	KEGG_PD_Pathway
ENSG00000213585	voltage dependent anion channel 1 [Source:HGNC Symbol;Acc:HGNC:12669]	VDAC1	KEGG_PD_Pathway
ENSG00000165637	voltage dependent anion channel 2 [Source:HGNC Symbol;Acc:HGNC:12672]	VDAC2	KEGG_PD_Pathway
ENSG00000078668	voltage dependent anion channel 3 [Source:HGNC Symbol;Acc:HGNC:12674]	VDAC3	KEGG_PD_Pathway
ENSG00000069329	VPS35 retromer complex component [Source:HGNC Symbol;Acc:HGNC:13487]	VPS35	1. Vilageliu and Grinberg et al., 2017, Current Protein & Peptide Science 2. Lunati et al., 2018, Revue Neurologique	1. 10.2174/1389203717666160311115956 2. https://doi.org/10.1016/j.neurol.2018.08.004
ENSG00000100219	X-box binding protein 1 [Source:HGNC Symbol;Acc:HGNC:12801]	XBP1	KEGG_PD_Pathway
ENSG00000182348	zinc finger protein 804B [Source:HGNC Symbol;Acc:HGNC:21958]	ZNF804B	Schormair et al., 2017, Lancet Neurology	10.1016/S1474-4422(17)30327-7
