# Supplementary material for: A Computational Analysis in a Cohort of Parkinson’s Disease Patients and Clock-Modified Colorectal Cancer Cells Reveals Common Expression Alterations in Clock-Regulated Genes
Source: Cancers (Basel). 2021 Nov 28;13(23):5978. doi: 10.3390/cancers13235978 (PMC8657387; doi:10.3390/cancers13235978)
Supplement: Supplementary file 1 [file cancers-13-05978-s001.zip › Supplementary_Files/Yalcinetal_Supplementary_Tables/Supplementary Table 8.xlsx]

## Sheet: Enrichment_Results_Rhythmic
Supplementary Table 8. GO Biological Process Enrichment results of 24h and 12h rhythmic genes
Cell_Line	Period	ID	Description	GeneRatio	BgRatio	pvalue	p.adjust	geneID
HCT116WT	24h	GO:0043153	entrainment of circadian clock by photoperiod	9/966	24/11496	8.25301e+09	0.45622616637679	CRY1/PER3/CRY2/PER2/BHLHE40/FBXL17/RBM4/PER1/FBXL6
HCT116WT	24h	GO:0009648	photoperiodism	9/966	26/11496	0.000169102887885945	0.467400382116753	CRY1/PER3/CRY2/PER2/BHLHE40/FBXL17/RBM4/PER1/FBXL6
HCT116WT	24h	GO:0009649	entrainment of circadian clock	9/966	28/11496	0.000320605131706194	0.590768389357281	CRY1/PER3/CRY2/PER2/BHLHE40/FBXL17/RBM4/PER1/FBXL6
HCT116WT	24h	GO:0051235	maintenance of location	31/966	216/11496	0.0022224663285492	0.999895302957721	CRY1/MCOLN3/KEAP1/CHERP/MCOLN1/RANGAP1/SQLE/NFKBIB/DBN1/SLC30A3/CCDC88A/ANKRD13C/ACVR1C/INSIG2/TRPM2/CAMK2D/ANK2/MCOLN2/TTC39B/TPCN2/BSCL2/MTLN/GBA/NRIP1/DRD1/TRPV1/FITM2/HTT/GPAA1/VPS13A/SPOUT1
HCT116WT	24h	GO:0001522	pseudouridine synthesis	6/966	18/11496	0.00266294880459854	0.999895302957721	RPUSD1/TSR3/NHP2/TRUB2/PUSL1/PUS1
HCT116WT	24h	GO:0016072	rRNA metabolic process	32/966	233/11496	0.00382956264639632	0.999895302957721	RPUSD1/TSR3/RRP12/WDR18/EXOSC5/SNU13/DDX17/NSUN5P2/NPM3/BYSL/DROSHA/NSUN5/RNASEL/URB1/NHP2/ABT1/DHX37/RRP1B/POP5/POP7/SART1/EXOSC4/RRS1/GEMIN4/MRPS11/TBL3/NOC4L/DDX51/PWP2/BOP1/RMRP/MRM1
HCT116WT	24h	GO:0010232	vascular transport	12/966	61/11496	0.00427288526520701	0.999895302957721	ATP2B4/SLC2A3/SLC7A5/SLC4A3/SLC1A4/ATP8A1/LRP3/SLC38A2/SLC2A13/SLC27A4/SLC19A1/SLC6A9
HCT116WT	24h	GO:0150104	transport across blood-brain barrier	12/966	61/11496	0.00427288526520701	0.999895302957721	ATP2B4/SLC2A3/SLC7A5/SLC4A3/SLC1A4/ATP8A1/LRP3/SLC38A2/SLC2A13/SLC27A4/SLC19A1/SLC6A9
HCT116WT	24h	GO:0006364	rRNA processing	31/966	226/11496	0.00446059556719847	0.999895302957721	RPUSD1/TSR3/RRP12/WDR18/EXOSC5/SNU13/DDX17/NSUN5P2/NPM3/BYSL/NSUN5/RNASEL/URB1/NHP2/ABT1/DHX37/RRP1B/POP5/POP7/SART1/EXOSC4/RRS1/GEMIN4/MRPS11/TBL3/NOC4L/DDX51/PWP2/BOP1/RMRP/MRM1
HCT116WT	24h	GO:0007176	regulation of epidermal growth factor-activated receptor activity	7/966	26/11496	0.00459292158352694	0.999895302957721	GPRC5A/AREG/ERRFI1/TGFA/BTC/CHMP6/ZGPAT
HCT116WT	12h	GO:0032102	negative regulation of response to external stimulus	11/187	211/11496	0.000664610245887281	0.181511736053809	PDGFB/RIOK3/PPARD/DUSP1/ADORA2A/LDLR/NR1H2/SEMA7A/NOTCH1/MAPK7/RTN4RL1
HCT116WT	12h	GO:0006006	glucose metabolic process	9/187	161/11496	0.00125799393118364	0.258602760290209	DGAT2/GPI/ALDOC/PPARD/ALDOA/HK2/MIDN/EPM2AIP1/PHLDA2
HCT116WT	12h	GO:0042445	hormone metabolic process	7/187	108/11496	0.00188539158649877	0.258602760290209	DGAT2/SCARB1/LIPE/HSD17B1/SLC16A10/SRD5A3/SELENOM
HCT116WT	12h	GO:0019915	lipid storage	5/187	59/11496	0.00265520196178333	0.258602760290209	DGAT2/SCARB1/PPARD/NR1H2/HILPDA
HCT116WT	12h	GO:0006641	triglyceride metabolic process	5/187	62/11496	0.00330035100286012	0.258602760290209	DGAT2/SCARB1/LIPE/LDLR/NR1H2
HCT116WT	12h	GO:0042692	muscle cell differentiation	10/187	223/11496	0.0035166067536905	0.258602760290209	EHD2/CTDP1/PDGFB/DYRK1B/KDM6B/SYPL2/NOTCH1/MESP1/KRT19/MRTFA
HCT116WT	12h	GO:0045834	positive regulation of lipid metabolic process	6/187	91/11496	0.00363168478437214	0.258602760290209	DGAT2/SCARB1/PDGFB/PPARD/LDLR/NR1H2
HCT116WT	12h	GO:0016051	carbohydrate biosynthetic process	8/187	155/11496	0.00380591655490001	0.258602760290209	DGAT2/PDGFB/GPI/ALDOC/ALDOA/B3GNT4/EPM2AIP1/NDST2
HCT116WT	12h	GO:0061061	muscle structure development	14/187	384/11496	0.004031168860931	0.258602760290209	EHD2/CTDP1/ERBB3/PDGFB/DYRK1B/PPARD/PDLIM2/KDM6B/SYPL2/NOTCH1/MESP1/KRT19/BCL9L/MRTFA
HCT116WT	12h	GO:0034754	cellular hormone metabolic process	5/187	65/11496	0.00405133204258748	0.258602760290209	DGAT2/SCARB1/LIPE/HSD17B1/SRD5A3
HCT116-ARNTLKO	24h	GO:0002686	negative regulation of leukocyte migration	6/293	24/11503	2.37165e+09	0.0707224627600876	C5AR2/CCN3/CCL28/PTGER4/APOD/MMP28
HCT116-ARNTLKO	24h	GO:0002685	regulation of leukocyte migration	11/293	108/11503	9.33702e+09	0.139214918323776	DAPK2/STK10/LGALS3/C5AR2/CCN3/CCL28/IL6R/CXCL8/PTGER4/APOD/MMP28
HCT116-ARNTLKO	24h	GO:0050900	leukocyte migration	16/293	225/11503	0.000207615002013947	0.17737535362002	DAPK2/STK10/CXCR4/SDC4/VPREB3/LGALS3/C5AR2/CCN3/LYST/CCL28/IL6R/CXCL8/PTGER4/STAT5B/APOD/MMP28
HCT116-ARNTLKO	24h	GO:0007389	pattern specification process	18/293	275/11503	0.00023792803973175	0.17737535362002	DNAH5/PALB2/HOXA3/DKK1/ARL6/APC2/GORAB/PAX8/LRP4/AHI1/SIX3/CCDC40/DZIP1L/RNF207/EOMES/HOXC5/HOXB4/PGAP1
HCT116-ARNTLKO	24h	GO:0030278	regulation of ossification	8/293	69/11503	0.000349639473974737	0.208524982278533	DKK1/TWIST1/LRP4/BMP2K/BMP6/OSR2/PTGER4/PHOSPHO1
HCT116-ARNTLKO	24h	GO:0140013	meiotic nuclear division	10/293	111/11503	0.000525725690074224	0.248336051262077	MLH3/TEX14/P3H4/NPM2/GPR3/RAD51B/SLX4/EME2/SYCE1L/MEIOSIN
HCT116-ARNTLKO	24h	GO:0002683	negative regulation of immune system process	15/293	225/11503	0.000644767047629003	0.248336051262077	FSTL3/CD274/SDC4/LGALS3/C5AR2/CCN3/SUSD4/CCL28/ALOX15/GPER1/PTGER4/A2M/APOD/HLA-DOB/MMP28
HCT116-ARNTLKO	24h	GO:0097529	myeloid leukocyte migration	9/293	96/11503	0.000744093055364165	0.248336051262077	DAPK2/LGALS3/C5AR2/CCN3/IL6R/CXCL8/PTGER4/STAT5B/MMP28
HCT116-ARNTLKO	24h	GO:0030155	regulation of cell adhesion	24/293	466/11503	0.000836090827325147	0.248336051262077	LIMCH1/TFE3/FSTL3/UNC13D/PPM1F/NEDD9/CD46/CD274/CXCR4/SDC4/LGALS3/RIN2/CCL28/PDE3B/BMP6/ALOX15/CXCL8/RHOD/STAT5B/SART1/ACER2/MUC1/APOD/NF1
HCT116-ARNTLKO	24h	GO:0030595	leukocyte chemotaxis	9/293	100/11503	0.000999340246527472	0.248336051262077	DAPK2/CXCR4/LGALS3/C5AR2/CCN3/LYST/IL6R/CXCL8/MMP28
HCT116-ARNTLKO	12h	GO:0070374	positive regulation of ERK1 and ERK2 cascade	6/160	98/11503	0.00242115658324542	0.75574922807583	GCNT2/PDGFRB/DNAJC27/PRXL2C/LGALS9/CHRNA7
HCT116-ARNTLKO	12h	GO:0045446	endothelial cell differentiation	5/160	76/11503	0.00408379493787115	0.75574922807583	ARHGEF26/TJP2/ZEB1/ZDHHC21/SOX18
HCT116-ARNTLKO	12h	GO:0043410	positive regulation of MAPK cascade	11/160	321/11503	0.00521341196458012	0.75574922807583	TRAF1/FGFR1/MID1/GCNT2/PDGFRB/DNAJC27/EPHA4/PRXL2C/ZC3H12A/LGALS9/CHRNA7
HCT116-ARNTLKO	12h	GO:0003158	endothelium development	5/160	85/11503	0.00656392741188869	0.75574922807583	ARHGEF26/TJP2/ZEB1/ZDHHC21/SOX18
HCT116-ARNTLKO	12h	GO:0007601	visual perception	5/160	89/11503	0.00794754912125228	0.75574922807583	PAX6/CEP250/AOC2/CACNA2D4/BEST1
HCT116-ARNTLKO	12h	GO:0050953	sensory perception of light stimulus	5/160	92/11503	0.00910986106660102	0.75574922807583	PAX6/CEP250/AOC2/CACNA2D4/BEST1
HCT116-ARNTLKO	12h	GO:0008015	blood circulation	9/160	275/11503	0.0146866570478473	0.75574922807583	NPR3/SGK1/TJP2/ADAMTS16/CACNA2D4/ZC3H12A/ZDHHC21/CACNB4/RYR1
HCT116-ARNTLKO	12h	GO:0002064	epithelial cell development	6/160	149/11503	0.0177695917619396	0.75574922807583	PAX6/ARHGEF26/TJP2/ARNTL/ZDHHC21/SOX18
HCT116-ARNTLKO	12h	GO:0070372	regulation of ERK1 and ERK2 cascade	6/160	164/11503	0.0269744832677569	0.75574922807583	GCNT2/PDGFRB/DNAJC27/PRXL2C/LGALS9/CHRNA7
HCT116-ARNTLKO	12h	GO:0044057	regulation of system process	9/160	306/11503	0.0271712107992284	0.75574922807583	SGK1/TRPC3/CACNA2D4/ZC3H12A/CNIH2/CHRNA7/ZDHHC21/CACNB4/RYR1
HCT116-PER2KO	24h	GO:0021854	hypothalamus development	5/415	10/11447	1.32537e+09	0.0575874211570151	NCOA1/BAX/ETS1/SRD5A1/HAP1
HCT116-PER2KO	24h	GO:0006695	cholesterol biosynthetic process	9/415	55/11447	0.000143398205918717	0.159449086798506	MSMO1/IDI1/FDFT1/MVK/HSD17B7/LSS/MVD/FASN/DHCR7
HCT116-PER2KO	24h	GO:1902653	secondary alcohol biosynthetic process	9/415	55/11447	0.000143398205918717	0.159449086798506	MSMO1/IDI1/FDFT1/MVK/HSD17B7/LSS/MVD/FASN/DHCR7
HCT116-PER2KO	24h	GO:0019216	regulation of lipid metabolic process	23/415	280/11447	0.000218167905162183	0.159449086798506	ABCA7/IDI1/PLPP1/FDFT1/NCOA1/PDGFB/CAV1/EDF1/MVK/NR4A3/AGAP2/SMPD2/FGF2/RGL1/PLIN2/ACSL1/SAMD8/LSS/MVD/FASN/DHCR7/NR1D2/PDGFA
HCT116-PER2KO	24h	GO:0016126	sterol biosynthetic process	9/415	59/11447	0.00024934089221351	0.159449086798506	MSMO1/IDI1/FDFT1/MVK/HSD17B7/LSS/MVD/FASN/DHCR7
HCT116-PER2KO	24h	GO:0061045	negative regulation of wound healing	7/415	36/11447	0.000262481127621689	0.159449086798506	EDN1/PDGFB/PLAT/F12/FGF2/PHLDB2/PDGFA
HCT116-PER2KO	24h	GO:0030193	regulation of blood coagulation	7/415	37/11447	0.000313764600351613	0.159449086798506	TBXA2R/EDN1/PDGFB/PLAT/CAV1/F12/PDGFA
HCT116-PER2KO	24h	GO:1900046	regulation of hemostasis	7/415	37/11447	0.000313764600351613	0.159449086798506	TBXA2R/EDN1/PDGFB/PLAT/CAV1/F12/PDGFA
HCT116-PER2KO	24h	GO:1903035	negative regulation of response to wounding	8/415	50/11447	0.000393123935810877	0.159449086798506	EDN1/PDGFB/PLAT/EPHA4/F12/FGF2/PHLDB2/PDGFA
HCT116-PER2KO	24h	GO:0032411	positive regulation of transporter activity	9/415	63/11447	0.000413291861137421	0.159449086798506	ANTKMT/KMT2A/AKAP9/ACTN4/RNF207/CACNB2/HAP1/HTT/KCTD7
HCT116-PER2KO	12h	GO:0009069	serine family amino acid metabolic process	5/89	29/11447	2.60014e+08	0.00430842544200002	SARS1/PSAT1/CSAD/SRR/DHFR2
HCT116-PER2KO	12h	GO:0003158	endothelium development	5/89	88/11447	0.000598457768742278	0.165274087134326	TJP2/STARD13/HEY2/XDH/HEG1
HCT116-PER2KO	12h	GO:1901605	alpha-amino acid metabolic process	5/89	133/11447	0.00373769832355667	0.281871241066882	SARS1/PSAT1/CSAD/SRR/DHFR2
HCT116-PER2KO	12h	GO:0007389	pattern specification process	7/89	269/11447	0.00489491547175089	0.318876616948368	CRAMP1/LRP6/HOXA3/PAX8/LRP4/HEY2/NKD1
HCT116-PER2KO	12h	GO:0003002	regionalization	6/89	205/11447	0.005195937632834	0.318876616948368	LRP6/HOXA3/PAX8/LRP4/HEY2/NKD1
HCT116-PER2KO	12h	GO:0090596	sensory organ morphogenesis	5/89	150/11447	0.00620902870468758	0.367441448702404	LRP6/PAX8/NKD1/CHD7/CEP290
HCT116-PER2KO	12h	GO:0048729	tissue morphogenesis	9/89	449/11447	0.00802152559961774	0.389746350108193	LRP6/PAX8/STARD13/HEY2/NKD1/CHD7/HEG1/GCNT1/CEP290
HCT116-PER2KO	12h	GO:0048562	embryonic organ morphogenesis	5/89	176/11447	0.0119276715779958	0.412129492835283	LRP6/HOXA3/PAX8/CHD7/CEP290
HCT116-PER2KO	12h	GO:0007423	sensory organ development	7/89	319/11447	0.0119833636788694	0.412129492835283	LRP6/USP45/PAX8/HEY2/NKD1/CHD7/CEP290
HCT116-PER2KO	12h	GO:0003013	circulatory system process	7/89	333/11447	0.0148837199674163	0.412129492835283	SLC1A2/TJP2/HEY2/KLK1/CHD7/HEG1/SLC6A17
HCT116-NR1D1KO	24h	GO:0051642	centrosome localization	7/660	27/11490	0.00064576346023087	0.970550803834378	SYNE2/INTS13/EZR/SUN2/PARD3B/AKAP9/SPOUT1
HCT116-NR1D1KO	24h	GO:0061842	microtubule organizing center localization	7/660	28/11490	0.000818888160885723	0.970550803834378	SYNE2/INTS13/EZR/SUN2/PARD3B/AKAP9/SPOUT1
HCT116-NR1D1KO	24h	GO:0003341	cilium movement	12/660	77/11490	0.00137708564135836	0.970550803834378	KATNIP/INTS13/SPA17/CAMSAP3/ODAD1/CCDC40/CFAP298/SLC9B2/CFAP91/INPP5B/CFAP44/MAFIP
HCT116-NR1D1KO	24h	GO:0043153	entrainment of circadian clock by photoperiod	6/660	24/11490	0.00193826505748299	0.970550803834378	CRY1/PER3/CRY2/PER2/SIK1/RBM4
HCT116-NR1D1KO	24h	GO:0019098	reproductive behavior	5/660	18/11490	0.0028200076086822	0.970550803834378	NCOA1/THRB/KALRN/OXTR/DRD1
HCT116-NR1D1KO	24h	GO:0022613	ribonucleoprotein complex biogenesis	39/660	429/11490	0.00293647458251608	0.970550803834378	TSR3/RRP12/SF3A1/SNU13/EIF3J/ERCC2/DDX49/GTPBP10/CPSF6/KAT2B/ERI3/EMG1/PRMT7/SRSF1/WDR12/CUL4A/NOB1/TXNL4A/UTP14A/TFB2M/SLU7/PSIP1/RPUSD4/MRPL36/RSL1D1/SMN1/RPL38/IMP3/EXOSC4/NPM1/RPF2/NUDT16/LSM2/WDR46/MCTS1/EIF6/RMRP/ZNF658/LOC102724159
HCT116-NR1D1KO	24h	GO:0009648	photoperiodism	6/660	26/11490	0.00300588903026925	0.970550803834378	CRY1/PER3/CRY2/PER2/SIK1/RBM4
HCT116-NR1D1KO	24h	GO:0009649	entrainment of circadian clock	6/660	28/11490	0.00446057129284236	0.970550803834378	CRY1/PER3/CRY2/PER2/SIK1/RBM4
HCT116-NR1D1KO	24h	GO:0033617	mitochondrial cytochrome c oxidase assembly	5/660	22/11490	0.00716353627872362	0.970550803834378	TIMM21/SCO1/OXA1L/COA4/SCO2
HCT116-NR1D1KO	24h	GO:0016072	rRNA metabolic process	23/660	233/11490	0.00784115790873873	0.970550803834378	TSR3/RRP12/SNU13/ERCC2/DDX49/KAT2B/ERI3/TRIR/EMG1/WDR12/NOB1/UTP14A/TFB2M/RPUSD4/RSL1D1/IMP3/EXOSC4/RPF2/NUDT16/WDR46/EIF6/RMRP/LOC102724159
HCT116-NR1D1KO	12h	GO:0006120	mitochondrial electron transport, NADH to ubiquinone	5/97	53/11490	8.04953e+09	0.0561276429133002	ND6/ND2/ND4/ND1/ND4L
HCT116-NR1D1KO	12h	GO:0042775	mitochondrial ATP synthesis coupled electron transport	6/97	93/11490	0.000130681454082757	0.0561276429133002	ND6/CYTB/ND2/ND4/ND1/ND4L
HCT116-NR1D1KO	12h	GO:0042773	ATP synthesis coupled electron transport	6/97	94/11490	0.000138649754436765	0.0561276429133002	ND6/CYTB/ND2/ND4/ND1/ND4L
HCT116-NR1D1KO	12h	GO:0006119	oxidative phosphorylation	7/97	136/11490	0.000147704323456053	0.0561276429133002	ND6/CYTB/ND2/ND4/ND1/ATP6/ND4L
HCT116-NR1D1KO	12h	GO:0022900	electron transport chain	7/97	153/11490	0.000305243610968137	0.0789282607776925	CYBB/ND6/CYTB/ND2/ND4/ND1/ND4L
HCT116-NR1D1KO	12h	GO:0022904	respiratory electron transport chain	6/97	109/11490	0.000311558924122471	0.0789282607776925	ND6/CYTB/ND2/ND4/ND1/ND4L
HCT116-NR1D1KO	12h	GO:0046034	ATP metabolic process	8/97	265/11490	0.00177154483120244	0.26927481434277	SLC4A4/ND6/CYTB/ND2/ND4/ND1/ATP6/ND4L
HCT116-NR1D1KO	12h	GO:0045333	cellular respiration	6/97	171/11490	0.003219365700616	0.326229057662422	ND6/CYTB/ND2/ND4/ND1/ND4L
HCT116-NR1D1KO	12h	GO:0006611	protein export from nucleus	6/97	175/11490	0.0036078140510157	0.330099352976664	DESI1/SRSF5/DNAJC27/SRSF11/BAG3/SMG1
HCT116-NR1D1KO	12h	GO:0051168	nuclear export	6/97	189/11490	0.00524573530578047	0.44297320359924	DESI1/SRSF5/DNAJC27/SRSF11/BAG3/SMG1
