# Supplementary material for: A Computational Analysis in a Cohort of Parkinson’s Disease Patients and Clock-Modified Colorectal Cancer Cells Reveals Common Expression Alterations in Clock-Regulated Genes
Source: Cancers (Basel). 2021 Nov 28;13(23):5978. doi: 10.3390/cancers13235978 (PMC8657387; doi:10.3390/cancers13235978)
Supplement: Supplementary file 1 [file cancers-13-05978-s001.zip › Supplementary_Files/Yalcinetal_Supplementary_Tables/Supplementary Table 9.xlsx]

## Sheet: Enrichment_Results_DE_Genes
Supplementary Table 9. GO Biological Process Enrichment results of differentially expressed genes in HCT116 cells
Cell_Line	ID	Description	GeneRatio	BgRatio	pvalue	p.adjust	geneID
HCT116-ARNTLKO vs HCT116WT	GO:0043062	extracellular structure organization	62/1253	194/10860	0.16836	7757.82	KLK7/PHLDB2/ADAM19/SPARC/KLK5/CAV1/ICAM1/PDGFB/MIA/LAMA1/ADAMTS14/CAV2/PXDN/FKBP10/DPP4/CCN2/SERPINE1/COL9A3/RUNX1/AGRN/ITGB8/LAMC2/CDH1/SERPINF2/MELTF/SMPD3/DDR1/BSG/COL13A1/TIMP2/RGCC/SOX9/LAMA3/WNT3A/FURIN/TGFB2/NPNT/LAMC1/ADAMTS16/COL18A1/MYO1E/TEX14/CYP1B1/SULF2/COL9A2/ITGB4/HAS3/FBLN5/NOXO1/APLP1/THBS1/VCAN/MMP14/ADAMTS15/THSD4/HSPG2/COL17A1/SCUBE1/COL16A1/COL4A6/CSGALNACT1/COL4A3
HCT116-ARNTLKO vs HCT116WT	GO:0030198	extracellular matrix organization	61/1253	193/10860	4.84359	7757.82	KLK7/PHLDB2/ADAM19/SPARC/KLK5/CAV1/ICAM1/PDGFB/MIA/LAMA1/ADAMTS14/CAV2/PXDN/FKBP10/DPP4/CCN2/SERPINE1/COL9A3/RUNX1/AGRN/ITGB8/LAMC2/CDH1/SERPINF2/MELTF/SMPD3/DDR1/BSG/COL13A1/TIMP2/RGCC/SOX9/LAMA3/WNT3A/FURIN/TGFB2/NPNT/LAMC1/ADAMTS16/COL18A1/MYO1E/CYP1B1/SULF2/COL9A2/ITGB4/HAS3/FBLN5/NOXO1/APLP1/THBS1/VCAN/MMP14/ADAMTS15/THSD4/HSPG2/COL17A1/SCUBE1/COL16A1/COL4A6/CSGALNACT1/COL4A3
HCT116-ARNTLKO vs HCT116WT	GO:0045229	external encapsulating structure organization	61/1253	193/10860	4.84359	7757.82	KLK7/PHLDB2/ADAM19/SPARC/KLK5/CAV1/ICAM1/PDGFB/MIA/LAMA1/ADAMTS14/CAV2/PXDN/FKBP10/DPP4/CCN2/SERPINE1/COL9A3/RUNX1/AGRN/ITGB8/LAMC2/CDH1/SERPINF2/MELTF/SMPD3/DDR1/BSG/COL13A1/TIMP2/RGCC/SOX9/LAMA3/WNT3A/FURIN/TGFB2/NPNT/LAMC1/ADAMTS16/COL18A1/MYO1E/CYP1B1/SULF2/COL9A2/ITGB4/HAS3/FBLN5/NOXO1/APLP1/THBS1/VCAN/MMP14/ADAMTS15/THSD4/HSPG2/COL17A1/SCUBE1/COL16A1/COL4A6/CSGALNACT1/COL4A3
HCT116-ARNTLKO vs HCT116WT	GO:0030855	epithelial cell differentiation	96/1253	398/10860	57.1786	68685.9	PALLD/CPT1A/LIF/KLK5/KRT23/ARNTL/CAV1/BMP4/ICAM1/ZBED2/PDGFB/WNT16/MET/EREG/LAMA1/EHF/TCF21/WWTR1/CDKN1A/SFN/CLIC4/TBX3/ZFP36L1/PPARG/CD109/SERPINE1/CDH3/DSC3/RUNX1/KRT16/SLC7A11/SOX4/EZR/KLF5/KLF4/ID3/ETV4/FASN/GSTK1/KRT19/VEGFA/CDK6/SPRY1/BMP7/ID2/SOX9/KRT15/FOSL2/PCK2/SULT2B1/DSC2/FURIN/ZEB1/KRTAP2-3/ROCK2/KRT86/ST14/CSTA/MYO7A/ATF4/KLF2/KRT7/KLF15/PRSS8/CEACAM1/CLDN3/FN3K/PDE2A/COL18A1/PTK7/I…
HCT116-ARNTLKO vs HCT116WT	GO:0001944	vasculature development	103/1253	444/10860	106.691	102530	SPARC/FGF9/LIF/CAV1/BMP4/PDGFB/FUT1/TWIST1/EREG/CXCL8/LAMA1/TCF21/MCAM/GATA2/RAMP1/FKBP10/PDE3B/ERAP1/AKT3/CCN3/PLK2/STIM1/CLIC4/TBX3/ZFP36L1/PPARG/RHOB/CCN2/HOXA3/SERPINE1/CEMIP2/RUNX1/PIK3R3/XBP1/STRA6/IL18/ITGB8/CARD10/SOX4/KLF5/SRPX2/KLF4/SERPINF2/VEGFA/BSG/PTGS2/BMP7/RGCC/TCF7L2/TYMP/TGFB2/ADGRG1/AMOTL2/ROCK2/TLR3/TGFBR3/KLF2/SEMA3C/CEACAM1/CHD7/PDE2A/COL18A1/PTK7/ID1/MYO1E/EIF2AK3/HMGA2/CYP…
HCT116-ARNTLKO vs HCT116WT	GO:0001568	blood vessel development	99/1253	422/10860	147.851	118404	SPARC/CAV1/BMP4/PDGFB/FUT1/TWIST1/EREG/CXCL8/LAMA1/TCF21/MCAM/GATA2/RAMP1/FKBP10/PDE3B/ERAP1/AKT3/CCN3/PLK2/STIM1/CLIC4/TBX3/ZFP36L1/PPARG/RHOB/CCN2/HOXA3/SERPINE1/CEMIP2/RUNX1/PIK3R3/XBP1/STRA6/IL18/ITGB8/CARD10/SOX4/KLF5/SRPX2/KLF4/SERPINF2/VEGFA/BSG/PTGS2/BMP7/RGCC/TCF7L2/TYMP/TGFB2/ADGRG1/AMOTL2/ROCK2/TLR3/TGFBR3/KLF2/SEMA3C/CEACAM1/CHD7/PDE2A/COL18A1/PTK7/ID1/MYO1E/EIF2AK3/HMGA2/CYP1B1/GPX1/…
HCT116-ARNTLKO vs HCT116WT	GO:0098609	cell-cell adhesion	101/1253	439/10860	30.6201	210185	ADAM19/PALLD/CD74/CAV1/BMP4/ICAM1/HLA-DRA/HLA-DRB1/HLA-DPA1/IL20RB/TNFSF9/CDC42EP1/CCN3/DPP4/ZFP36L1/CLDN4/UBASH3B/VTCN1/PDLIM5/CDH3/DSC3/CD9/RUNX1/PCDHGA10/XBP1/SKAP1/SLC7A11/IL18/IL4R/FUT3/PCDH19/SOX4/EZR/CDH1/SRPX2/KLF4/SERPINF2/CD33/IL27RA/CD58/PTAFR/CLDN7/PCDH7/VEGFA/BSG/ARG2/COL13A1/BMP7/WNK1/RGCC/SOX9/MYB/EFNB1/LAMA3/KIRREL1/DSC2/WNT3A/TNFSF4/TGFB2/SERPINB8/ASS1/BVES/CSTA/NPNT/VSIR/CD55/CE…
HCT116-ARNTLKO vs HCT116WT	GO:0006954	inflammatory response	85/1253	345/10860	387.587	232795	NR1D2/PLA2G3/ICAM1/H19/HLA-DRB1/IFI35/IL20RB/PLSCR1/DPEP1/CASP4/CXCL8/GGT5/NR1D1/CCN3/NMI/SERPINA1/USP18/SERPINA3/PPARG/LDLR/SERPINE1/SMPDL3B/F8/SELENOS/KRT16/MVK/IL18/IL4R/KLF4/SERPINF2/CSF1/PTAFR/SEMA7A/TMSB4X/CTNNBIP1/PTGS2/LYZ/PER1/FNDC4/PLA2G7/AXL/TRADD/TNFSF4/LIPA/AOC3/ASS1/TLR3/PTGER4/NUPR1/PDE2A/SNCA/SIGIRR/LTB4R2/ABCD1/GPX1/IL15/EPHA2/RELB/PTGS1/NLRP4/MGLL/ABCC2/HYAL1/SERPINF1/THBS1/F2R/…
HCT116-ARNTLKO vs HCT116WT	GO:0030155	regulation of cell adhesion	100/1253	439/10860	740.331	395255	PHLDB2/ADAM19/CD74/TACSTD2/LIF/CAV1/BMP4/ICAM1/DLC1/HLA-DRA/HLA-DRB1/PDGFB/HLA-DPA1/FUT1/PLAU/IL20RB/CXCL8/LAMA1/TNFSF9/PDE3B/DPP4/EPB41L4B/UBASH3B/VTCN1/SERPINE1/CD9/RUNX1/TESC/XBP1/SKAP1/IL18/IL4R/FUT3/SOX4/CDH1/KLF4/SERPINF2/CSF1/IL27RA/PTAFR/MELTF/CLDN7/DDR1/VEGFA/CDK6/ARG2/BMP7/STX3/WNK1/RGCC/SOX9/MYB/ARHGDIB/EFNB1/LAMA3/WNT3A/TNFSF4/TGFB2/ADGRG1/ROCK2/ASS1/NPNT/VSIR/CD55/CEACAM1/TMEM131L/PT…
HCT116-ARNTLKO vs HCT116WT	GO:0003013	circulatory system process	78/1253	309/10860	845.03	4060.37	HTR7/PDE4B/CAV1/ICAM1/FXYD3/PDGFB/SLC1A3/WWTR1/SLC4A3/ERAP1/STIM1/SLC5A1/PPARG/CCN2/SLC1A5/OCLN/SLCO3A1/SERPINF2/SLC6A9/PTAFR/SLC1A4/VEGFA/CTNNBIP1/PTGS2/ID2/CACNB4/TRHDE/DSC2/TGFB2/SLC7A8/ROCK2/BVES/KLF2/CEACAM1/ADAMTS16/TTN/CHD7/PDE2A/PTPRJ/CAMK2N1/P2RX4/RGS4/RGS2/DOCK5/SLC27A1/GPX1/SREBF1/FXYD1/KCNIP3/PTGS1/ADM2/GSN/SLC38A5/AKAP12/ABCC2/NOS3/SLC16A7/KCNQ1/CACNA1G/F2R/TRPM4/SLC7A5/FKBP1B/SLC1A1…
HCT116-PER2KO vs HCT116WT	GO:0002683	negative regulation of immune system process	73/2122	210/10860	1.24975e+07	0.000634625353427556	TRAF3IP1/TMBIM6/DPP4/PRKDC/DDT/FAM3A/BMP4/NR1H2/HLA-DRB1/CD74/KITLG/PRDX2/PHPT1/CD68/YTHDF3/GATA2/ZC3H12A/TNFSF4/SCRIB/LDLR/BANK1/PLCL2/PPARG/CCN3/SERPINB9/SOX9/GPR137/HLA-B/NBL1/TKFC/RC3H1/CD59/RUNX1/SELENOS/CD22/MDK/THOC1/DUSP1/HLA-E/AXL/CD55/NMI/NR1D1/HLA-F/GPAM/PAG1/GPNMB/TNFSF18/GPX1/LGALS3/BCL6/ZFPM1/RIOK3/LPXN/SMAD7/ARG2/ATM/VSIR/THBS1/TLR3/MIF/TREX1/LGALS9/BST2/DHX58/PADI2/VTCN1/TSC22D3/I…
HCT116-PER2KO vs HCT116WT	GO:0032102	negative regulation of response to external stimulus	69/2122	199/10860	3.07344e+07	0.000690319365266982	SEMA3A/TRAF3IP1/CHD8/PRKCD/CD9/DPP4/SERPINE2/PDGFB/DDT/FAM3A/NR1H2/HLA-DRB1/ASH1L/FGF2/PRDX2/SERPINE1/EPHA4/YTHDF3/SERPINF2/SHARPIN/LDLR/F12/PPARG/CCN3/SERPINB9/HLA-B/NBL1/SIGIRR/TKFC/SOCS3/SERPINF1/SELENOS/NUCB2/MDK/DUSP1/PLAUR/HLA-E/SEMA3B/PHLDB2/NMI/NR1D1/HLA-F/CORO1B/RTN4RL1/NOS3/KLK8/FNDC4/GPX1/CLDN3/PLAU/RIOK3/NT5E/ARG2/KLF4/THBS1/RTN4R/EPPK1/SEMA3G/MIF/PLXNA3/TREX1/LGALS9/DHX58/PADI2/SEMA3…
HCT116-PER2KO vs HCT116WT	GO:0060333	interferon-gamma-mediated signaling pathway	31/2122	66/10860	4.07829e+07	0.000690319365266982	ICAM1/PRKCD/NR1H2/HLA-DRA/HLA-DRB1/HLA-DPA1/B2M/PARP9/IFI30/PPARG/HLA-B/OASL/SOCS3/IRF7/MT2A/HLA-E/IRF9/SP100/NMI/HLA-F/IRF2/GBP2/HLA-DPB1/OAS1/TRIM34/PTAFR/TRIM22/NCAM1/TRIM5/TXK/HLA-DQB1
HCT116-PER2KO vs HCT116WT	GO:0034341	response to interferon-gamma	45/2122	115/10860	8.37108e+07	0.00106270892515116	ICAM1/PRKCD/VIM/NR1H2/HLA-DRA/HLA-DRB1/HLA-DPA1/CD74/IFITM3/B2M/PARP9/IFI30/PPARG/HLA-B/IFITM2/OASL/DAPK1/CD58/SOCS3/CITED1/IRF7/GAPDH/MT2A/HLA-E/IFITM1/IRF9/SP100/SLC26A6/NMI/HLA-F/IRF2/GBP2/HLA-DPB1/GSN/OAS1/TRIM34/PTAFR/TRIM22/TLR3/NCAM1/TRIM5/TXK/LGALS9/HLA-DQB1/BST2
HCT116-PER2KO vs HCT116WT	GO:0098609	cell-cell adhesion	125/2122	439/10860	2.6312e+08	0.00267224875418946	PALLD/ICAM1/CXADR/ADAM19/PRKCD/CD9/DPP4/SERPINE2/WNK1/SRPX2/IL18/BMP4/HLA-DRA/HLA-DRB1/HLA-DPA1/SOX4/CD74/CD33/PRDX2/SRC/CELSR1/PIEZO1/MYB/NFAT5/STK10/ETS1/TGFBR2/AFDN/PLEKHA7/SERPINF2/NECTIN3/TMOD3/ZC3H12A/FXYD5/TNFSF4/TNFSF9/SCRIB/ICAM3/BSG/CCN3/MAG/FUT3/SOX9/COL13A1/CLDN4/SKAP1/CDC42EP1/RC3H1/MYADM/PERP/CD58/PDLIM5/NTN1/PODXL/ICOSLG/CLDN23/RUNX1/ADGRL1/CERCAM/DSC3/MDK/PLAUR/HLA-E/NPNT/CD55/CDH…
HCT116-PER2KO vs HCT116WT	GO:0001816	cytokine production	123/2122	433/10860	3.60056e+08	0.00277419771674765	INAVA/PDE4B/EREG/H19/TRAF3IP1/LRRFIP1/ASB1/PRKDC/CYBA/EP300/IL18/DDT/SETD2/HDAC2/HLA-DRB1/HLA-DPA1/CD74/CD33/B2M/ISG15/SERPINE1/PLA2G3/MYB/NFAT5/MAVS/BTN3A3/S100A13/CREBBP/LAPTM4B/SERPINF2/AGPAT2/ZC3H12A/TNFSF4/TWIST1/SCRIB/NAV3/BANK1/ABCD1/DDX58/HLA-B/LTBP1/SIGIRR/DHX36/CD58/REL/TSKU/ICOSLG/HIF1A/RUNX1/IRF7/ERMAP/SELENOS/GAPDH/MDK/HLA-E/HEG1/AXL/CD55/MAPK11/F3/NMI/EPHA2/LGR4/HLA-F/GPAM/STAT5B/MC…
HCT116-PER2KO vs HCT116WT	GO:0001817	regulation of cytokine production	117/2122	409/10860	4.31981e+08	0.00277419771674765	INAVA/PDE4B/EREG/H19/TRAF3IP1/LRRFIP1/ASB1/PRKDC/CYBA/EP300/IL18/DDT/SETD2/HDAC2/HLA-DRB1/HLA-DPA1/CD74/CD33/B2M/ISG15/SERPINE1/PLA2G3/MYB/MAVS/BTN3A3/CREBBP/LAPTM4B/SERPINF2/AGPAT2/ZC3H12A/TNFSF4/TWIST1/SCRIB/NAV3/BANK1/ABCD1/DDX58/HLA-B/LTBP1/SIGIRR/DHX36/CD58/REL/TSKU/ICOSLG/HIF1A/RUNX1/IRF7/ERMAP/SELENOS/GAPDH/MDK/HLA-E/HEG1/AXL/MAPK11/F3/NMI/EPHA2/LGR4/HLA-F/GPAM/STAT5B/MC1R/SULF2/GPNMB/HLA-…
HCT116-PER2KO vs HCT116WT	GO:0019221	cytokine-mediated signaling pathway	131/2122	469/10860	4.51375e+08	0.00277419771674765	PXDN/EREG/IRS1/ICAM1/IFIT3/PRKCD/LCN2/WNK1/P4HB/SQSTM1/AIP/VIM/IL18/PDGFB/IFI6/IFI27/NR1H2/HLA-DRA/HLA-DRB1/MTAP/HLA-DPA1/TNFSF13/FGF2/CD74/IFITM3/IL18BP/PSME2/B2M/ISG15/ECM1/PARP9/SRC/CXCL8/CDKN1A/LIF/MAVS/LEPR/TRAF5/IFI30/YTHDF3/CNOT9/AGPAT2/IFIT2/SHARPIN/TIMP1/CASP4/TNFSF4/POU2F1/IFI35/TWIST1/TNFSF9/PPARG/PSMD1/PSME1/HLA-B/IL20RA/IFITM2/OASL/SIGIRR/SOCS3/HIF1A/MST1R/RUNX1/CTF1/TNFRSF25/IRF7/MT…
HCT116-PER2KO vs HCT116WT	GO:0009617	response to bacterium	85/2122	277/10860	4.91685e+08	0.00277419771674765	INAVA/PDE4B/ICAM1/CDC73/PRKCD/LCN2/SPARC/CHD7/CYBA/VIM/IL18/MTDH/HDAC2/HLA-DRB1/FKBP5/IFI44/B2M/MAPKAPK3/ISG15/PRDX2/SERPINE1/SRC/CXCL8/MAVS/GJB2/CD68/ZC3H12A/TNFSF4/BANK1/COCH/SERPINB9/HLA-B/SIGIRR/GSDMB/SASH1/CITED1/SELENOS/HLA-E/AXL/ABCC2/CD55/LYZ/EPHA2/GGT5/NR1D1/GBP2/HMCN1/RNF5/NAIP/LOXL1/C3/MGST2/NOS3/AKAP12/CEP192/ADGRB1/GPX1/NFKBIA/ANG/IL22RA1/GGT7/ARG2/ZFP36/PTAFR/CYP1A1/TLR3/ANXA3/MEF2C…
HCT116-PER2KO vs HCT116WT	GO:0071346	cellular response to interferon-gamma	39/2122	101/10860	6.47016e+08	0.00319906910854142	ICAM1/PRKCD/VIM/NR1H2/HLA-DRA/HLA-DRB1/HLA-DPA1/B2M/PARP9/IFI30/PPARG/HLA-B/OASL/DAPK1/CD58/SOCS3/IRF7/GAPDH/MT2A/HLA-E/IRF9/SP100/SLC26A6/NMI/HLA-F/IRF2/GBP2/HLA-DPB1/GSN/OAS1/TRIM34/PTAFR/TRIM22/TLR3/NCAM1/TRIM5/TXK/LGALS9/HLA-DQB1
HCT116-NR1D1KO vs HCT116WT	GO:0043062	extracellular structure organization	90/2262	194/10860	0.0832438	32.2953	KLK7/DPP4/TGFB2/VCAN/ADAM19/MIA/MELTF/COL12A1/SERPINE1/COL13A1/ICAM1/KLK5/CAV2/FKBP10/TIMP2/ITGA3/ADAMTS14/CCN2/CAV1/RUNX1/CDH1/LOXL2/LAMB3/THBS1/TIMP1/COL9A3/APP/PDGFB/FGF2/COL27A1/ITGA6/AGRN/HAS3/MPZL3/WNT3A/SPARC/TEX14/FBLN1/P3H4/COL17A1/COL9A2/MMP14/KAZALD1/SH3PXD2A/COL18A1/BSG/FN1/ITGB8/WASHC1/ERO1A/FOXF1/LAMB1/QSOX1/ELF3/LAMC1/LTBP3/COL6A1/PAPLN/SOX9/NF1/MFAP2/COL6A2/ITGA1/ITGB4/ANTXR1/SPP1…
HCT116-NR1D1KO vs HCT116WT	GO:0030198	extracellular matrix organization	89/2262	193/10860	0.190458	32.2953	KLK7/DPP4/TGFB2/VCAN/ADAM19/MIA/MELTF/COL12A1/SERPINE1/COL13A1/ICAM1/KLK5/CAV2/FKBP10/TIMP2/ITGA3/ADAMTS14/CCN2/CAV1/RUNX1/CDH1/LOXL2/LAMB3/THBS1/TIMP1/COL9A3/APP/PDGFB/FGF2/COL27A1/ITGA6/AGRN/HAS3/MPZL3/WNT3A/SPARC/FBLN1/P3H4/COL17A1/COL9A2/MMP14/KAZALD1/SH3PXD2A/COL18A1/BSG/FN1/ITGB8/WASHC1/ERO1A/FOXF1/LAMB1/QSOX1/ELF3/LAMC1/LTBP3/COL6A1/PAPLN/SOX9/NF1/MFAP2/COL6A2/ITGA1/ITGB4/ANTXR1/SPP1/HSPG2…
HCT116-NR1D1KO vs HCT116WT	GO:0045229	external encapsulating structure organization	89/2262	193/10860	0.190458	32.2953	KLK7/DPP4/TGFB2/VCAN/ADAM19/MIA/MELTF/COL12A1/SERPINE1/COL13A1/ICAM1/KLK5/CAV2/FKBP10/TIMP2/ITGA3/ADAMTS14/CCN2/CAV1/RUNX1/CDH1/LOXL2/LAMB3/THBS1/TIMP1/COL9A3/APP/PDGFB/FGF2/COL27A1/ITGA6/AGRN/HAS3/MPZL3/WNT3A/SPARC/FBLN1/P3H4/COL17A1/COL9A2/MMP14/KAZALD1/SH3PXD2A/COL18A1/BSG/FN1/ITGB8/WASHC1/ERO1A/FOXF1/LAMB1/QSOX1/ELF3/LAMC1/LTBP3/COL6A1/PAPLN/SOX9/NF1/MFAP2/COL6A2/ITGA1/ITGB4/ANTXR1/SPP1/HSPG2…
HCT116-NR1D1KO vs HCT116WT	GO:0001568	blood vessel development	154/2262	422/10860	2.91409	3204.49	EREG/PPARG/PLK2/ERAP1/KLF5/TGFB2/TGFBR2/CXCL8/NRP1/STRA6/SERPINE1/STAT1/SYK/FKBP10/CITED1/SP100/RAMP1/CCN2/CCN3/CAV1/RUNX1/TLR3/LOXL2/THBS1/SERPINF1/PARVA/SCG2/SMAD7/PDGFB/SRPX2/SPRY2/ECM1/FGF2/TGFBR3/CHD7/ACVR1/EMC10/EPHA2/ARHGAP24/PAXIP1/JAG1/PDCL3/CLIC4/AHR/TIPARP/KLF4/ARHGAP22/HIF1A/EFNB2/FZD5/PDE3B/MINAR1/SPARC/NRARP/HMGA2/PIK3R3/AGO2/ADM/HOXA13/HK2/MMP14/HOXA5/HMOX1/HOXA3/ZC3H12A/FGFBP1/COL…
HCT116-NR1D1KO vs HCT116WT	GO:0001944	vasculature development	160/2262	444/10860	3.14969	3204.49	EREG/PPARG/FGF9/PLK2/ERAP1/KLF5/TGFB2/TGFBR2/CXCL8/NRP1/STRA6/SERPINE1/STAT1/SYK/FKBP10/CITED1/SP100/RAMP1/CCN2/CCN3/CAV1/RUNX1/TLR3/LOXL2/SGCB/LIF/THBS1/SERPINF1/PARVA/SCG2/SMAD7/PDGFB/SRPX2/SPRY2/ECM1/FGF2/TGFBR3/CHD7/ACVR1/EMC10/EPHA2/ARHGAP24/PAXIP1/JAG1/PDCL3/CLIC4/AHR/TIPARP/KLF4/ARHGAP22/HIF1A/EFNB2/FZD5/PDE3B/MINAR1/SPARC/NRARP/HMGA2/PIK3R3/AGO2/ADM/HOXA13/HK2/MMP14/HOXA5/HMOX1/HOXA3/ZC3H…
HCT116-NR1D1KO vs HCT116WT	GO:0030855	epithelial cell differentiation	146/2262	398/10860	8.69723	737.38	EREG/PPARG/MET/HNF1B/PALLD/GRHL2/KLF5/VIM/KRT32/HNF4A/NRP1/OVOL1/SERPINE1/BMP6/TFCP2L1/STAT1/ZEB1/ICAM1/KLK5/GRHL1/CITED1/CDK6/WWTR1/CAV1/RUNX1/MYCL/CDKN1A/LIF/RAB25/CPT1A/TGFB1I1/OPHN1/CCDC88C/KDF1/PDGFB/MYD88/SPRY2/AFDN/FGF2/ACVR1/KRT13/EHF/CYP1A1/EPHA2/IKBKB/JAG1/VDR/CLIC4/ST14/PODXL/KLF4/HIF1A/WNT16/CD109/KRT15/ADAM9/PKP3/SHROOM3/KRT16/PSAP/KRT19/NR5A2/IL6ST/AQP3/ESRP1/KRT86/HOXA13/SPRED3/ONE…
HCT116-NR1D1KO vs HCT116WT	GO:0048514	blood vessel morphogenesis	136/2262	365/10860	16.3378	11872.9	EREG/PPARG/PLK2/ERAP1/KLF5/TGFB2/TGFBR2/CXCL8/NRP1/STRA6/SERPINE1/STAT1/SYK/FKBP10/CITED1/SP100/RAMP1/CCN2/CCN3/CAV1/RUNX1/TLR3/LOXL2/THBS1/SERPINF1/PARVA/SCG2/SMAD7/SRPX2/SPRY2/ECM1/FGF2/TGFBR3/CHD7/ACVR1/EMC10/EPHA2/ARHGAP24/PAXIP1/JAG1/PDCL3/CLIC4/TIPARP/KLF4/ARHGAP22/HIF1A/EFNB2/FZD5/PDE3B/MINAR1/SPARC/NRARP/HMGA2/PIK3R3/AGO2/ADM/HOXA13/HK2/MMP14/HOXA5/HMOX1/HOXA3/ZC3H12A/FGFBP1/COL18A1/SH2D2…
HCT116-NR1D1KO vs HCT116WT	GO:0006954	inflammatory response	128/2262	345/10860	123.703	78659.4	PPARG/TNFSF4/HLA-DRB1/SERPINA1/CXCL8/IFI35/DPEP1/SERPINE1/USP18/BMP6/ICAM1/SYK/APOL2/ABHD12/GBA/STK39/CCN3/TLR3/PLSCR1/LYZ/TPST1/HLA-E/THBS1/NR1D1/TIMP1/LGALS9/SERPINF1/RIPK1/SCG2/APP/SERPINA3/MYD88/REL/PRKCD/ECM1/NMI/CSF1/ACVR1/EPHA2/IKBKB/CASP4/FNDC4/KLF4/HIF1A/TFR2/PXK/IL1R1/HK1/KRT16/LTB4R2/ADGRE2/HYAL2/IL6ST/TGM2/ADM/PTGS1/SETD6/ADA/UNC13D/PER1/SYT11/SELENOS/HMOX1/STAT5B/ZC3H12A/AOC3/BRD4/FN…
HCT116-NR1D1KO vs HCT116WT	GO:0001525	angiogenesis	117/2262	311/10860	40.9936	23170.5	EREG/PPARG/PLK2/ERAP1/KLF5/TGFB2/TGFBR2/CXCL8/NRP1/SERPINE1/STAT1/SYK/SP100/RAMP1/CCN2/CCN3/CAV1/RUNX1/TLR3/LOXL2/THBS1/SERPINF1/PARVA/SCG2/SRPX2/SPRY2/ECM1/FGF2/TGFBR3/ACVR1/EMC10/EPHA2/ARHGAP24/JAG1/PDCL3/CLIC4/KLF4/ARHGAP22/HIF1A/EFNB2/FZD5/PDE3B/MINAR1/SPARC/NRARP/HMGA2/PIK3R3/AGO2/ADM/HK2/MMP14/HOXA5/HMOX1/HOXA3/ZC3H12A/FGFBP1/COL18A1/SH2D2A/BSG/FN1/VASH2/HGS/ITGB8/EPAS1/SHC1/C3/TWIST1/CEACA…
HCT116-NR1D1KO vs HCT116WT	GO:0060333	interferon-gamma-mediated signaling pathway	38/2262	66/10860	6631.65	3.37352e+06	PPARG/PARP14/OAS1/HLA-DPA1/B2M/HLA-DRB1/HLA-A/OAS3/PARP9/HLA-C/OASL/HLA-B/HLA-DRA/STAT1/ICAM1/NR1H2/SP100/IRF9/TRIM22/MID1/HLA-E/PRKCD/NMI/IRF1/IRF7/HLA-F/MT2A/HLA-DPB1/TRIM21/TRIM34/IRF2/TRIM38/SOCS1/TRIM5/TXK/GBP2/NCAM1/HLA-DQB1
