# Supplementary material for: A Computational Analysis in a Cohort of Parkinson’s Disease Patients and Clock-Modified Colorectal Cancer Cells Reveals Common Expression Alterations in Clock-Regulated Genes
Source: Cancers (Basel). 2021 Nov 28;13(23):5978. doi: 10.3390/cancers13235978 (PMC8657387; doi:10.3390/cancers13235978)
Supplement: Supplementary file 1 [file cancers-13-05978-s001.zip › Supplementary_Files/Yalcinetal_Supplementary_Tables/Supplementary Table 10.xlsx]

## Sheet: Enrichment_Results_DE_GSE99039
Supplementary Table 10. GO Biological Process Enrichment results of differentially expressed genes in Parkinson’s DiseaseDataset
Cohort_Information	ID	Description	GeneRatio	BgRatio	pvalue	p.adjust	geneID
IPD vs Control (Total)	GO:0043312	neutrophil degranulation	52/537	485/18862	0.0161418	45.6188	OSCAR/S100A11/CAPN1/PSAP/CKAP4/IGF2R/MVP/SLPI/CYBA/RHOG/KCNAB2/TNFRSF1B/DGAT1/MMP9/TYROBP/TCIRG1/PLEKHO2/DEFA1/FPR1/ADAM8/CFD/CDA/KRT1/HK3/PTPN6/DEFA4/PGLYRP1/LILRB2/MMP25/FGR/CD300A/CAMP/P2RX1/SLC11A1/CEACAM3/LILRB3/SERPINA1/NBEAL2/GSDMD/ADGRG3/DOK3/ARHGAP9/COTL1/SLC15A4/SLC44A2/RAB24/TRAPPC1/NAPRT/RAB37/RAB4B/NFAM1/STK10
IPD vs Control (Total)	GO:0002283	neutrophil activation involved in immune response	52/537	488/18862	0.0209453	45.6188	OSCAR/S100A11/CAPN1/PSAP/CKAP4/IGF2R/MVP/SLPI/CYBA/RHOG/KCNAB2/TNFRSF1B/DGAT1/MMP9/TYROBP/TCIRG1/PLEKHO2/DEFA1/FPR1/ADAM8/CFD/CDA/KRT1/HK3/PTPN6/DEFA4/PGLYRP1/LILRB2/MMP25/FGR/CD300A/CAMP/P2RX1/SLC11A1/CEACAM3/LILRB3/SERPINA1/NBEAL2/GSDMD/ADGRG3/DOK3/ARHGAP9/COTL1/SLC15A4/SLC44A2/RAB24/TRAPPC1/NAPRT/RAB37/RAB4B/NFAM1/STK10
IPD vs Control (Total)	GO:0002446	neutrophil mediated immunity	52/537	499/18862	0.0534339	63.2707	OSCAR/S100A11/CAPN1/PSAP/CKAP4/IGF2R/MVP/SLPI/CYBA/RHOG/KCNAB2/TNFRSF1B/DGAT1/MMP9/TYROBP/TCIRG1/PLEKHO2/DEFA1/FPR1/ADAM8/CFD/CDA/KRT1/HK3/PTPN6/DEFA4/PGLYRP1/LILRB2/MMP25/FGR/CD300A/CAMP/P2RX1/SLC11A1/CEACAM3/LILRB3/SERPINA1/NBEAL2/GSDMD/ADGRG3/DOK3/ARHGAP9/COTL1/SLC15A4/SLC44A2/RAB24/TRAPPC1/NAPRT/RAB37/RAB4B/NFAM1/STK10
IPD vs Control (Total)	GO:0042119	neutrophil activation	52/537	500/18862	0.0580998	63.2707	OSCAR/S100A11/CAPN1/PSAP/CKAP4/IGF2R/MVP/SLPI/CYBA/RHOG/KCNAB2/TNFRSF1B/DGAT1/MMP9/TYROBP/TCIRG1/PLEKHO2/DEFA1/FPR1/ADAM8/CFD/CDA/KRT1/HK3/PTPN6/DEFA4/PGLYRP1/LILRB2/MMP25/FGR/CD300A/CAMP/P2RX1/SLC11A1/CEACAM3/LILRB3/SERPINA1/NBEAL2/GSDMD/ADGRG3/DOK3/ARHGAP9/COTL1/SLC15A4/SLC44A2/RAB24/TRAPPC1/NAPRT/RAB37/RAB4B/NFAM1/STK10
IPD vs Control (Total)	GO:0042110	T cell activation	36/537	474/18862	9.91714e+06	8.63981e+09	FKBP1A/HSPD1/FLOT2/LAPTM5/PRKCZ/TNFRSF1B/BCL2/DPP4/TCIRG1/BCL3/ADAM8/GPR183/TRAF6/RASGRP1/CD27/IL2RA/CD28/PTPN6/CRTAM/HSPH1/LILRB1/LILRB2/TNFSF14/CD8B/GBA/CD300A/SLC11A1/ITK/LEF1/BCL11B/ZC3H8/GPR89B/GPR89A/CAMK4/CD5/PRDX2
IPD vs Control (Total)	GO:1903131	mononuclear cell differentiation	32/537	411/18862	2.97122e+07	0.000215710828517896	PRKCZ/HDAC5/LTBR/BCL2/TCIRG1/BCL3/ADAM8/SPI1/FES/GPR183/TRAF6/CD27/IL2RA/CD28/PTPN6/CRTAM/LILRB1/LILRB2/GBA/ITK/PCID2/ADGRG3/LEF1/BCL11B/ZC3H8/GPR89B/GPR89A/ZBTB7A/MS4A1/CAMK4/NFAM1/PRDX2
IPD vs Control (Total)	GO:0030098	lymphocyte differentiation	28/537	358/18862	1.50587e+08	0.000937080645867255	PRKCZ/HDAC5/BCL2/TCIRG1/BCL3/ADAM8/SPI1/GPR183/CD27/IL2RA/CD28/PTPN6/CRTAM/LILRB2/GBA/ITK/PCID2/ADGRG3/LEF1/BCL11B/ZC3H8/GPR89B/GPR89A/ZBTB7A/MS4A1/CAMK4/NFAM1/PRDX2
IPD vs Control (Total)	GO:0001819	positive regulation of cytokine production	31/537	437/18862	3.25394e+08	0.00177177019366086	HSPD1/LAPTM5/HDAC2/PRKCZ/DHX9/CYBA/TGFB1/TYROBP/PDE4D/BCL3/ADAM8/TRAF6/RASGRP1/CD28/CRTAM/LILRB1/LILRB2/FGR/MYD88/MBP/SLC11A1/KIR2DL4/GSDMD/RGCC/POLR3K/C1QTNF3/NLRP12/MCOLN2/TLR6/NFAM1/PRKD2
IPD vs Control (Total)	GO:0045730	respiratory burst	8/537	36/18862	6.13662e+08	0.00297012569830549	CYBA/NCF1/NCF4/HCK/SLC11A1/NCF1B/CYBC1/PRDX2
IPD vs Control (Total)	GO:0042254	ribosome biogenesis	24/537	307/18862	8.4771e+08	0.00369262291607288	GTF3A/DKC1/ABCE1/NUP88/DDX10/MAK16/NOLC1/RSL1D1/URB1/GTPBP4/NOL8/WDR12/WDR3/PAK1IP1/NIP7/SHQ1/GAR1/NOL11/SBDS/RRP1/EIF2A/NOP58/RPUSD4/EXOSC6
IPD vs Control (Females)	GO:0043312	neutrophil degranulation	36/359	485/18862	327.637	735560	OSCAR/S100A11/GRN/CAPN1/CTSD/CST3/PRKCD/TOM1/ADGRE5/RHOG/DGAT1/PLEKHO2/ARSA/CFP/PTPN6/CXCR1/PGLYRP1/FCAR/MMP25/NCSTN/NEU1/STXBP2/SLC11A1/SIGLEC9/PLAUR/C5AR1/ADGRG3/DBNL/AP1M1/COTL1/SLC44A2/TRAPPC1/TMEM179B/RAB37/NFAM1/ATP6V0C
IPD vs Control (Females)	GO:0002283	neutrophil activation involved in immune response	36/359	488/18862	391.881	735560	OSCAR/S100A11/GRN/CAPN1/CTSD/CST3/PRKCD/TOM1/ADGRE5/RHOG/DGAT1/PLEKHO2/ARSA/CFP/PTPN6/CXCR1/PGLYRP1/FCAR/MMP25/NCSTN/NEU1/STXBP2/SLC11A1/SIGLEC9/PLAUR/C5AR1/ADGRG3/DBNL/AP1M1/COTL1/SLC44A2/TRAPPC1/TMEM179B/RAB37/NFAM1/ATP6V0C
IPD vs Control (Females)	GO:0002446	neutrophil mediated immunity	36/359	499/18862	746.233	741866	OSCAR/S100A11/GRN/CAPN1/CTSD/CST3/PRKCD/TOM1/ADGRE5/RHOG/DGAT1/PLEKHO2/ARSA/CFP/PTPN6/CXCR1/PGLYRP1/FCAR/MMP25/NCSTN/NEU1/STXBP2/SLC11A1/SIGLEC9/PLAUR/C5AR1/ADGRG3/DBNL/AP1M1/COTL1/SLC44A2/TRAPPC1/TMEM179B/RAB37/NFAM1/ATP6V0C
IPD vs Control (Females)	GO:0042119	neutrophil activation	36/359	500/18862	790.481	741866	OSCAR/S100A11/GRN/CAPN1/CTSD/CST3/PRKCD/TOM1/ADGRE5/RHOG/DGAT1/PLEKHO2/ARSA/CFP/PTPN6/CXCR1/PGLYRP1/FCAR/MMP25/NCSTN/NEU1/STXBP2/SLC11A1/SIGLEC9/PLAUR/C5AR1/ADGRG3/DBNL/AP1M1/COTL1/SLC44A2/TRAPPC1/TMEM179B/RAB37/NFAM1/ATP6V0C
IPD vs Control (Females)	GO:0002573	myeloid leukocyte differentiation	19/359	204/18862	1.37073e+06	1.02914e+09	OSCAR/JUN/ACIN1/LTBR/CTNNBIP1/TGFB1/CSF1R/RARA/GAB2/SBNO2/SPI1/FES/LILRB1/GBA/MYH9/TFE3/RIPK1/PRXL2A/NRROS
IPD vs Control (Females)	GO:0030099	myeloid cell differentiation	26/359	419/18862	1.43252e+07	8.96277e+09	OSCAR/JUN/ACIN1/G6PD/LTBR/CTNNBIP1/TGFB1/CSF1R/PTK2B/RARA/GAB2/SBNO2/SPI1/FES/ZBTB16/PTPN6/LILRB1/H3C8/GBA/MYH9/TFE3/RIPK1/PRXL2A/NRROS/RASGRP4/LDB1
IPD vs Control (Females)	GO:1903131	mononuclear cell differentiation	23/359	411/18862	4.38979e+08	0.00235418196105016	JUN/ACIN1/LTBR/CTNNBIP1/CSF1R/PTK2B/LGALS9/RARA/BCL3/SASH3/SPI1/FES/ZBTB16/PTPN6/LILRB1/GBA/GPS2/MYH9/ADGRG3/VSIR/ZBTB7B/RHOH/NFAM1
IPD vs Control (Females)	GO:1902105	regulation of leukocyte differentiation	18/359	279/18862	7.23355e+08	0.00276211780763016	JUN/ACIN1/CTNNBIP1/TGFB1/LGALS9/RARA/SASH3/FES/ZBTB16/PTPN6/LILRB1/TFE3/VSIR/RIPK1/PRXL2A/ZBTB7B/RHOH/NFAM1
IPD vs Control (Females)	GO:0006968	cellular defense response	8/359	54/18862	7.72249e+08	0.00276211780763016	RELA/PTK2B/LSP1/KIR3DL2/KIR2DS3/KIR2DL4/PRF1/C5AR1
IPD vs Control (Females)	GO:1902107	positive regulation of leukocyte differentiation	13/359	154/18862	8.09358e+08	0.00276211780763016	JUN/ACIN1/CTNNBIP1/TGFB1/LGALS9/RARA/SASH3/FES/ZBTB16/VSIR/RIPK1/ZBTB7B/RHOH
IPD vs Control (Males)	GO:0002283	neutrophil activation involved in immune response	88/787	488/18862	3.88703e-18	1.16541e-14	OSCAR/S100A11/CD63/GRN/GSN/CAPN1/CTSD/IGF2R/MVP/MAPK14/PRKCD/ADGRE5/SLPI/CYBA/RHOG/MME/TNFRSF1B/S100A9/DGAT1/MMP9/TYROBP/TCIRG1/IMPDH1/PLEKHO2/SELL/TLR2/FPR1/ADAM8/FCN1/CFD/TCN1/CDA/S100A12/KRT1/HK3/CFP/PTPN6/CPNE1/CXCR1/PGLYRP1/SYK/FCAR/LILRB2/LILRA2/MMP25/FGR/ANXA3/CEACAM1/PADI2/CD300A/P2RX1/SLC11A1/ADGRE3/CEACAM3/LILRB3/GYG1/SERPINA1/HBB/NBEAL2/HSPA6/KPNB1/ACAA1/ALDOA/ADGRG3/CRISPLD2/PYCARD/CA…
IPD vs Control (Males)	GO:0042119	neutrophil activation	89/787	500/18862	4.71061e-18	1.16541e-14	OSCAR/S100A11/CD63/GRN/GSN/CAPN1/CTSD/IGF2R/MVP/MAPK14/PRKCD/ADGRE5/SLPI/CYBA/RHOG/MME/TNFRSF1B/S100A9/DGAT1/MMP9/TYROBP/TCIRG1/IMPDH1/PLEKHO2/SELL/TLR2/FPR1/ADAM8/FCN1/CFD/TCN1/CDA/S100A12/KRT1/HK3/CFP/PTPN6/CPNE1/CXCR1/PGLYRP1/SYK/FCAR/LILRB2/LILRA2/MMP25/FGR/ANXA3/CEACAM1/PADI2/CD300A/P2RX1/SLC11A1/ADGRE3/CEACAM3/LILRB3/GYG1/SERPINA1/HBB/NBEAL2/HSPA6/KPNB1/ACAA1/ALDOA/ADGRG3/CRISPLD2/PYCARD/CA…
IPD vs Control (Males)	GO:0043312	neutrophil degranulation	87/787	485/18862	1.34313e-17	2.21528e-14	OSCAR/S100A11/CD63/GRN/GSN/CAPN1/CTSD/IGF2R/MVP/MAPK14/PRKCD/ADGRE5/SLPI/CYBA/RHOG/MME/TNFRSF1B/S100A9/DGAT1/MMP9/TYROBP/TCIRG1/IMPDH1/PLEKHO2/SELL/TLR2/FPR1/ADAM8/FCN1/CFD/TCN1/CDA/S100A12/KRT1/HK3/CFP/PTPN6/CPNE1/CXCR1/PGLYRP1/SYK/FCAR/LILRB2/MMP25/FGR/ANXA3/CEACAM1/PADI2/CD300A/P2RX1/SLC11A1/ADGRE3/CEACAM3/LILRB3/GYG1/SERPINA1/HBB/NBEAL2/HSPA6/KPNB1/ACAA1/ALDOA/ADGRG3/CRISPLD2/PYCARD/CANT1/MOS…
IPD vs Control (Males)	GO:0002446	neutrophil mediated immunity	87/787	499/18862	1.19459e-16	1.47771e-14	OSCAR/S100A11/CD63/GRN/GSN/CAPN1/CTSD/IGF2R/MVP/MAPK14/PRKCD/ADGRE5/SLPI/CYBA/RHOG/MME/TNFRSF1B/S100A9/DGAT1/MMP9/TYROBP/TCIRG1/IMPDH1/PLEKHO2/SELL/TLR2/FPR1/ADAM8/FCN1/CFD/TCN1/CDA/S100A12/KRT1/HK3/CFP/PTPN6/CPNE1/CXCR1/PGLYRP1/SYK/FCAR/LILRB2/MMP25/FGR/ANXA3/CEACAM1/PADI2/CD300A/P2RX1/SLC11A1/ADGRE3/CEACAM3/LILRB3/GYG1/SERPINA1/HBB/NBEAL2/HSPA6/KPNB1/ACAA1/ALDOA/ADGRG3/CRISPLD2/PYCARD/CANT1/MOS…
IPD vs Control (Males)	GO:0030099	myeloid cell differentiation	55/787	419/18862	0.0416964	4126.28	OSCAR/JUNB/NFKBIA/ADAR/MAPK14/LYN/TGFB1/PTK2B/BCL6/KMT2B/BPGM/CSF3R/RARA/GAB2/PIK3CD/MMP9/CEBPA/TYROBP/TCIRG1/SBNO2/TLR2/SPI1/FES/SLC4A1/H3C10/PTPN6/LILRB1/PRKDC/H3-3A/THOC5/CEACAM1/DNASE2/EPB42/LILRB3/ALAS2/RBPJ/H3-3B/NBEAL2/TFE3/CEBPB/PIP4K2A/H3C4/TAL1/EIF2AK1/SLC25A38/TESC/TRIM10/PITHD1/FAM210B/MFHAS1/JAK3/CAMK4/SP3/RASGRP4/FAXDC2
IPD vs Control (Males)	GO:0042110	T cell activation	53/787	474/18862	6510.21	5.36875e+06	GSN/FKBP1A/HLA-E/FLOT2/LAPTM5/PRKCZ/CSK/LYN/BCL6/IL4R/TNFRSF1B/RARA/PIK3CD/TCIRG1/BCL3/IL1B/ADAM8/CD8A/IL6R/CD27/VAV1/PTPN6/RIPOR2/FKBP1B/LILRB1/AKT1/SYK/LILRB2/TNFSF14/CD8B/PRKDC/CORO1A/CEACAM1/CD300A/SLC11A1/ITK/HLA-G/CEBPB/CD6/ERBB2/PYCARD/PRELID1/NFKBIZ/TNFAIP8L2/PREX1/VSIR/CHD7/PAK1/JAK3/JAML/CAMK4/SP3/PRDX2
IPD vs Control (Males)	GO:0031349	positive regulation of defense response	41/787	361/18862	62707.6	4.43253e+08	GRN/HLA-E/RAF1/PSMB3/NFKBIA/OPTN/DHX9/PRKCD/LYN/PRKACA/CYBA/S100A9/CEBPA/TYROBP/GPSM3/SNCA/TLR2/ICAM3/IL1B/ADAM8/FCN1/S100A12/VAV1/SYK/TNFRSF1A/LILRA2/HCK/PRKDC/IL16/IKBKG/HLA-G/MAPK3/CEBPB/FFAR2/PYCARD/HLA-F/NFKBIZ/NLRP12/SLC15A4/PAK1/PARP9
IPD vs Control (Males)	GO:1903706	regulation of hemopoiesis	44/787	415/18862	1.42782e+06	8.83109e+08	FBXO7/NFKBIA/PRKCZ/MAPK14/LYN/TGFB1/PTK2B/BCL6/IL4R/KMT2B/CSF3R/RARA/TYROBP/ADAM8/SPI1/FES/H3C10/CD27/PTPN6/LILRB1/SYK/LILRB2/PRKDC/H3-3A/CEACAM1/LILRB3/HLA-G/H3-3B/TFE3/CEBPB/H3C4/ERBB2/TAL1/TESC/PRELID1/PITHD1/NFKBIZ/FAM210B/VSIR/JAK3/CAMK4/NFAM1/PRDX2/FAXDC2
IPD vs Control (Males)	GO:0046777	protein autophosphorylation	30/787	226/18862	2.11617e+06	1.16342e+09	MVP/CSK/MARK3/CSNK1G2/LYN/PRKACA/PTK2B/MAP3K3/MAP3K11/MARK2/PPP2R5B/FES/DAPK2/BMX/AKT1/HCK/FGR/ITK/MAPK3/SIK2/ERBB2/EIF2AK1/MKNK2/NLRP12/PIM3/PAK1/CAMK4/MKNK1/PRKD2/STK10
IPD vs Control (Males)	GO:0002573	myeloid leukocyte differentiation	28/787	204/18862	3.00996e+06	1.38449e+08	OSCAR/JUNB/MAPK14/LYN/TGFB1/RARA/GAB2/PIK3CD/MMP9/CEBPA/TYROBP/TCIRG1/SBNO2/TLR2/SPI1/FES/LILRB1/THOC5/CEACAM1/LILRB3/RBPJ/TFE3/CEBPB/TAL1/EIF2AK1/TESC/CAMK4/SP3
