# Supplementary material for: A Computational Analysis in a Cohort of Parkinson’s Disease Patients and Clock-Modified Colorectal Cancer Cells Reveals Common Expression Alterations in Clock-Regulated Genes
Source: Cancers (Basel). 2021 Nov 28;13(23):5978. doi: 10.3390/cancers13235978 (PMC8657387; doi:10.3390/cancers13235978)
Supplement: Supplementary file 1 [file cancers-13-05978-s001.zip › Supplementary_Files/Yalcinetal_Supplementary_Tables/Supplementary Table 12.xlsx]

## Sheet: Sheet1
Supplementary Table 12. The list of differentially expressed genes found to be associated with overall survival of TCGA-COAD patients and results from the cox-regression analysis based on stratification for tumor stage
Gene_Symbol	q-value (Not-stage stratified survival analysis)	q-value (Stage stratified cox survival analysis)
APC2	0.026189	6.03252e-05
PCBP3	0.026189	0.000272341
ACOX1	0.0487492	0.000326024
CPT2	0.026189	0.000498981
SULT1B1	0.042732	0.00060684
C8orf79	0.0466101	0.00107049
GDF15	0.0466101	0.00138123
BMP5	0.0474643	0.00164616
ATP8B1	0.026189	0.00170993
PPARGC1A	0.026189	0.00187521
ACOT11	0.044784	0.00233903
TOX2	0.0466101	0.00253841
ELFN1	0.026189	0.00271678
SUCLG2	0.030201	0.00272937
SLC22A5	0.030201	0.00289453
SERINC2	0.0466101	0.00386206
BGN	0.030201	0.0044028
SOX6	0.037464	0.00456877
CCL15	0.0319526	0.00501982
SLC11A1	0.0319526	0.00505093
CLDN23	0.0466101	0.0064205
B3GNT8	0.0393725	0.00652212
FOXD1	0.042732	0.00678541
CALB2	0.0487492	0.00713974
SLC35D1	0.0487492	0.00742875
GLT25D2	0.037464	0.00791011
ABCA5	0.030201	0.00793034
GAL3ST2	0.0466101	0.00821524
TPSG1	0.037464	0.00839986
ANKRD6	0.026189	0.00840831
PRRT1	0.0466101	0.00849576
ZBTB7C	0.037464	0.00851938
HMGCS2	0.0466101	0.00897389
GABRD	0.0295837	0.00912617
LRFN1	0.0487492	0.00958709
TUBB6	0.0387633	0.0101354
MPP2	0.026189	0.0109921
SALL1	0.030201	0.012412
SLC6A1	0.042732	0.0124887
HIST1H4H	0.030201	0.0128497
PARM1	0.026189	0.0130726
LZTS1	0.042732	0.0132943
CTHRC1	0.042732	0.014373
CHSY3	0.042732	0.0144689
RIMKLB	0.0295837	0.0146613
FOXS1	0.0387633	0.0147363
NRG1	0.0439164	0.0152425
IGF2BP3	0.0387633	0.0154879
CELF6	0.037464	0.0162783
PC	0.037464	0.0170226
HCG27	0.044784	0.0170913
RORC	0.0466101	0.0174495
B4GALNT2	0.0353463	0.0176528
GSTM1	0.0468207	0.0178451
VAV3	0.0487492	0.0179712
KCNJ14	0.026189	0.0181647
AREG	0.0466101	0.0182168
CNTN3	0.0487492	0.0183637
COLEC11	0.03498	0.0186162
SLC26A3	0.0487492	0.0217774
TNFAIP8L3	0.0466101	0.0227102
B3GNT6	0.030201	0.0238996
INSC	0.030201	0.0239426
LOH3CR2A	0.0466101	0.0240828
FUCA1	0.030201	0.0243112
HAGHL	0.0474643	0.0253872
SDR42E1	0.0468207	0.0272829
HEPACAM2	0.0333986	0.0273959
PTPRN	0.0487492	0.0276723
FAM72B	0.0466101	0.0289483
KCNIP2	0.0474643	0.0297222
C6orf174	0.0474643	0.0302885
MEGF6	0.0474643	0.0306877
KIF13B	0.026189	0.031147
TESC	0.0474643	0.0315382
CPA6	0.0474643	0.031806
CAPN9	0.0474643	0.0321603
SMARCD3	0.0476335	0.0321659
ENTPD5	0.0476335	0.0328605
DMPK	0.030201	0.0329416
D4S234E	0.0482604	0.0339979
REEP2	0.0487492	0.0348182
TIGD1	0.0487492	0.0351481
PAK6	0.0487492	0.0356277
INCA1	0.0466101	0.0363081
ATOH1	0.026189	0.036911
EBF4	0.0487492	0.0371966
ITLN1	0.037464	0.0382059
STK31	0.0487492	0.0385091
MAPT	0.0487492	0.0391207
CDR2L	0.0487492	0.0406356
MT1L	0.0387633	0.0407156
SFRP2	0.0295837	0.0413446
TMEM61	0.0487492	0.041375
CCDC78	0.0387633	0.0414122
TRAP1	0.0487492	0.0416894
GSTM2	0.049743	0.0422214
MPP3	0.0487492	0.0427816
LRRC4	0.0487492	0.0429607
GPR44	0.0487492	0.0449499
OSBPL3	0.0487492	0.0452897
FZD3	0.0490864	0.0462357
GEFT	0.0493257	0.0479227
CLCA1	0.0466101	0.0486868
EDNRB	0.049743	0.0492269
FES	0.0474643	0.100244
PANK3	0.037464	0.100427
NAV3	0.0305882	0.10087
CDC25C	0.044784	0.102741
NAT2	0.026189	0.102899
HIST1H2AC	0.0487492	0.10531
NACAD	0.0499041	0.108276
SPP1	0.0487492	0.109187
GLDN	0.0466101	0.111812
TCP11L2	0.0466101	0.11183
SH3BGR	0.0468207	0.113027
NOX4	0.0487492	0.113196
TRPC1	0.026189	0.115023
PCK1	0.0493237	0.116001
PDE1B	0.0487492	0.116038
NEURL1B	0.0466101	0.118589
C4orf19	0.030201	0.124363
PLEKHA9	0.0324353	0.126533
PDZD7	0.044784	0.130917
ITGBL1	0.044784	0.133097
FBXO17	0.030201	0.133264
TKT	0.0487492	0.133858
SPOCD1	0.044784	0.135911
PAFAH2	0.0466101	0.135914
CRYAB	0.0387633	0.136178
SELENBP1	0.044784	0.137797
KIFC3	0.04113	0.139152
NAT1	0.030201	0.140945
C2orf27A	0.0466101	0.141899
SPON2	0.0466101	0.142818
CNNM2	0.0474643	0.143349
CACNB1	0.0466101	0.14359
SNCG	0.0468207	0.153554
SMPDL3A	0.0476335	0.154906
ADAMTS8	0.03498	0.156492
PTRF	0.044784	0.156665
PSD	0.026189	0.160282
TNNI3	0.0493257	0.162111
CA2	0.0487492	0.162835
ITGA7	0.044784	0.163487
CCDC136	0.026189	0.163641
PHYHIP	0.0499041	0.165045
TPM2	0.0295837	0.165394
KLK12	0.0487492	0.168639
P4HA3	0.030201	0.175501
POPDC2	0.0423315	0.179949
C6orf150	0.044784	0.180768
THBS2	0.037464	0.182649
SYT1	0.030201	0.183903
SUSD5	0.042732	0.185586
E2F5	0.042732	0.189649
SCG2	0.03498	0.191587
LPHN3	0.0487492	0.194578
F2RL1	0.0468207	0.194891
LOC644538	0.0474643	0.195518
AQP8	0.042732	0.195853
KBTBD11	0.044784	0.196537
ANO7	0.042732	0.199387
PTGER2	0.0387633	0.199674
MEIS1	0.0476335	0.201241
BEX5	0.0487492	0.207368
GPRASP1	0.0387633	0.219195
LOC400043	0.042732	0.221615
FXYD5	0.0466101	0.222259
KPNA2	0.0363802	0.222814
C2orf74	0.030201	0.223756
TAGLN	0.0466101	0.234635
PTGIS	0.042732	0.239465
JAZF1	0.0493257	0.24186
CTF1	0.026189	0.245784
TMEM106A	0.0474643	0.248623
TUB	0.0466101	0.249565
KCNK10	0.044784	0.250484
SPEG	0.0487492	0.252472
OTUB2	0.0493257	0.254452
PLK1	0.0487492	0.257373
MAP6	0.0477429	0.270255
SULT1A1	0.0487492	0.271503
LOC399959	0.0466101	0.283309
PTP4A1	0.0468207	0.289594
HSPB8	0.044784	0.293155
FADS1	0.0487492	0.296645
TM6SF1	0.0487492	0.300239
SMAD9	0.0487492	0.300422
OLR1	0.0487492	0.301436
KIF15	0.044784	0.302265
PRRT2	0.0387633	0.302591
AOC3	0.0468207	0.307584
MMP14	0.0468207	0.307838
FAM50B	0.044784	0.312828
NDRG2	0.042732	0.317077
HAND2	0.0393725	0.320215
GPC2	0.037464	0.32931
NMUR1	0.0466101	0.329345
CDC25A	0.0487492	0.332687
TSHZ3	0.0487492	0.333578
SPARC	0.0474643	0.33549
ACTA2	0.0474643	0.337383
NECAB1	0.0493257	0.340685
PRELP	0.0423315	0.342955
CNN1	0.0487492	0.34926
GALK1	0.047916	0.349632
MYL9	0.026189	0.356347
FEZ1	0.0466101	0.368484
AKAP12	0.0387633	0.371663
MGP	0.030201	0.37688
TMEM200B	0.0474643	0.382023
MACC1	0.026189	0.382274
TRAF5	0.0487492	0.386649
CD38	0.0487492	0.391498
MFAP5	0.0468207	0.395712
NEO1	0.0474643	0.40392
UST	0.0474643	0.403924
DZIP1	0.0487492	0.404097
ZNF692	0.044784	0.404686
ProSAPiP1	0.0487492	0.405442
ANK3	0.037464	0.405755
PGM5	0.0487492	0.409612
CNTNAP1	0.0487492	0.410074
MAB21L2	0.0466101	0.412866
FCN3	0.044784	0.415146
FAM38B	0.044784	0.415575
COL1A1	0.0487492	0.420581
TMEM47	0.0387633	0.420891
CCNI2	0.0434041	0.426194
HSPB7	0.0487492	0.435183
ETHE1	0.049743	0.438073
RHOJ	0.0499041	0.438684
OXTR	0.0487492	0.439037
ELOVL4	0.030201	0.441685
DDX21	0.0466101	0.45854
SULF1	0.037464	0.45938
KIF26B	0.047916	0.471557
FLNA	0.0474643	0.486333
PALM	0.0487492	0.490783
POU2AF1	0.0466101	0.495234
PLN	0.0474643	0.497015
APBB1	0.042732	0.509971
PNMAL1	0.0468207	0.512218
ATP6V1C2	0.0474643	0.526171
RIMS3	0.0387633	0.528955
ACHE	0.044784	0.52915
ATP8A1	0.0487492	0.545012
PDLIM4	0.0466101	0.549666
DNA2	0.0487492	0.57843
CTLA4	0.0487492	0.581868
CBFA2T3	0.0468207	0.584476
P2RX4	0.0474643	0.591631
PACSIN2	0.044784	0.593567
VAT1L	0.0476335	0.596408
GABRE	0.030201	0.596984
BRIP1	0.0466101	0.607127
PNMAL2	0.037464	0.623113
ANGPTL1	0.044784	0.635035
MUC2	0.0487492	0.65342
CCR7	0.0487492	0.661231
GTSE1	0.049743	0.68115
EDAR	0.0466101	0.686246
CENPE	0.0487492	0.695102
PPP1R9A	0.0474643	0.695383
GCNT2	0.0487492	0.696143
PPP1R3C	0.0490864	0.702037
CCL14	0.0493257	0.703002
PBK	0.0493237	0.708609
RNF150	0.0487492	0.709407
ACO2	0.0474643	0.723965
PHLPP2	0.037464	0.727702
GINS2	0.0474643	0.729385
DEPDC1B	0.0474643	0.736224
SGIP1	0.0487492	0.739443
FAM46C	0.0487492	0.748122
RPS6KA5	0.0487492	0.758747
ADAMTSL3	0.042732	0.780407
CDC45	0.0487492	0.798464
VAMP2	0.0487492	0.839967
FOXQ1	0.0466101	0.847446
IL1B	0.0490864	0.866814
SLC41A2	0.044784	0.867192
IL8	0.0487492	0.891082
RCC1	0.044784	0.922245
CYBRD1	0.0476335	0.923483
CDHR3	0.0487492	0.963821
SLAMF7	0.0493237	0.964658
SEC14L2	0.0487492	0.978704
